# Supplementary material for: Genotype Diversity, Wild Bird-to-Poultry Transmissions, and Farm-to-Farm Carryover during the Spread of the Highly Pathogenic Avian Influenza H5N1 in the Czech Republic in 2021/2022
Source: Preprints.org preprint supplement (doi:10.20944/preprints202211.0545.v1), 2022-11-29
Supplement: Supplementary file 1 [file supplementary]

**Supplementary Material 1, Table 1.** Overview of pathological signs of infected birds. The table shows the frequency of pathological signs in absolute values and in percentages.

| Gross pathology lesions                                       | Chicken n=68 | Guinea fowl n=3 | Duck n=8 | Goose n=13 | Mute swan n=4 | Pheasant n=5 | Grey heron/egret n=19 |
|---------------------------------------------------------------|--------------|-----------------|----------|------------|---------------|--------------|-----------------------|
| Cyanosis or hyperemia of comb and wattle, head skin or beak   | 46 (68%)     |                 | 6 (75%)  | 9 (69%)    |               |              |                       |
| Cardiac or epicardiac haemorrhages, petechiae or inflammation |              |                 | 3 (38%)  | 5 (38%)    | 4 (100%)      |              | 2 (11%)               |
| Enlarged spleen                                               | 56 (82%)     | 3 (100%)        | 6 (75%)  | 11 (85%)   | 4 (100%)      | 5 (100%)     | 8 (42%)               |
| Serosal haemorrhages                                          | 32 (47%)     | 3 (100%)        | 7 (88%)  | 6 (46%)    | 2 (50%)       |              | 4 (21%)               |
| Pancreatic necrosis or haemorrhages                           | 34 (50%)     | 3 (100%)        | 6 (75%)  | 11 (85%)   | 2 (50%)       |              | 8 (42%)               |
| Proventricular haemorrhages or erosions                       | 47 (69%)     | 3 (100%)        | 4 (50%)  | 8 (62%)    | 2 (50%)       |              | 8 (42%)               |
| Lung hyperemia                                                | 59 (87%)     | 3 (100%)        | 8 (100%) | 10 (77%)   | 4 (100%)      | 5 (100%)     | 19 (100%)             |
| Hyperemic trachea                                             | 53 (78%)     | 3 (100%)        | 7 (88%)  | 10 (77%)   | 1 (25%)       |              | 8 (42%)               |
| Leg cyanosis or hyperemia                                     | 10 (15%)     | 3 (100%)        |          | 5 (38%)    |               |              |                       |

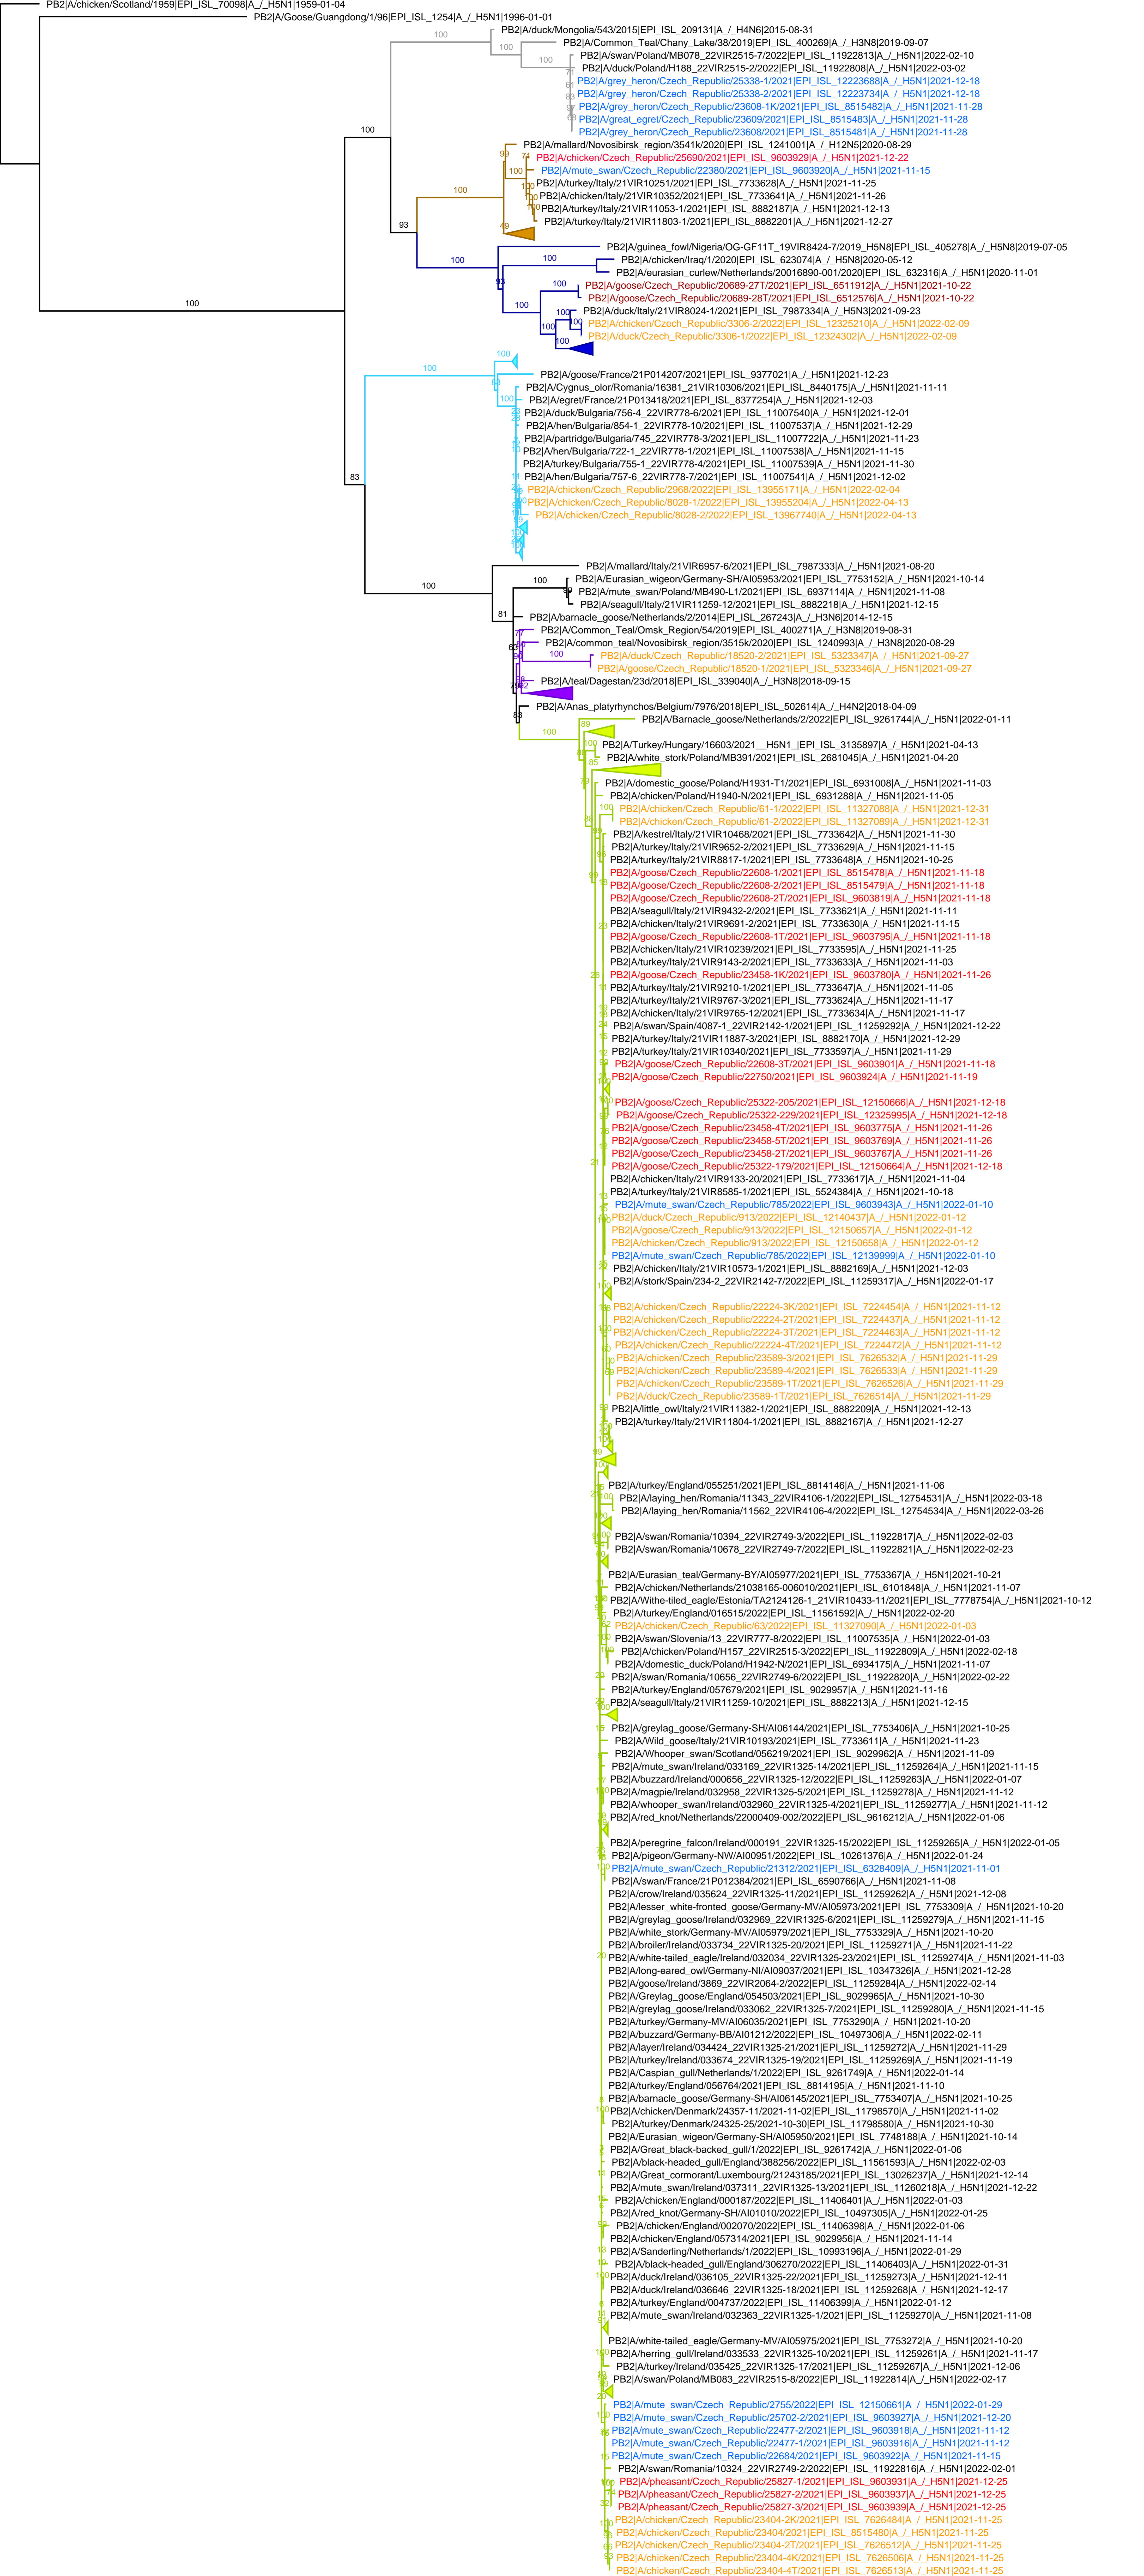





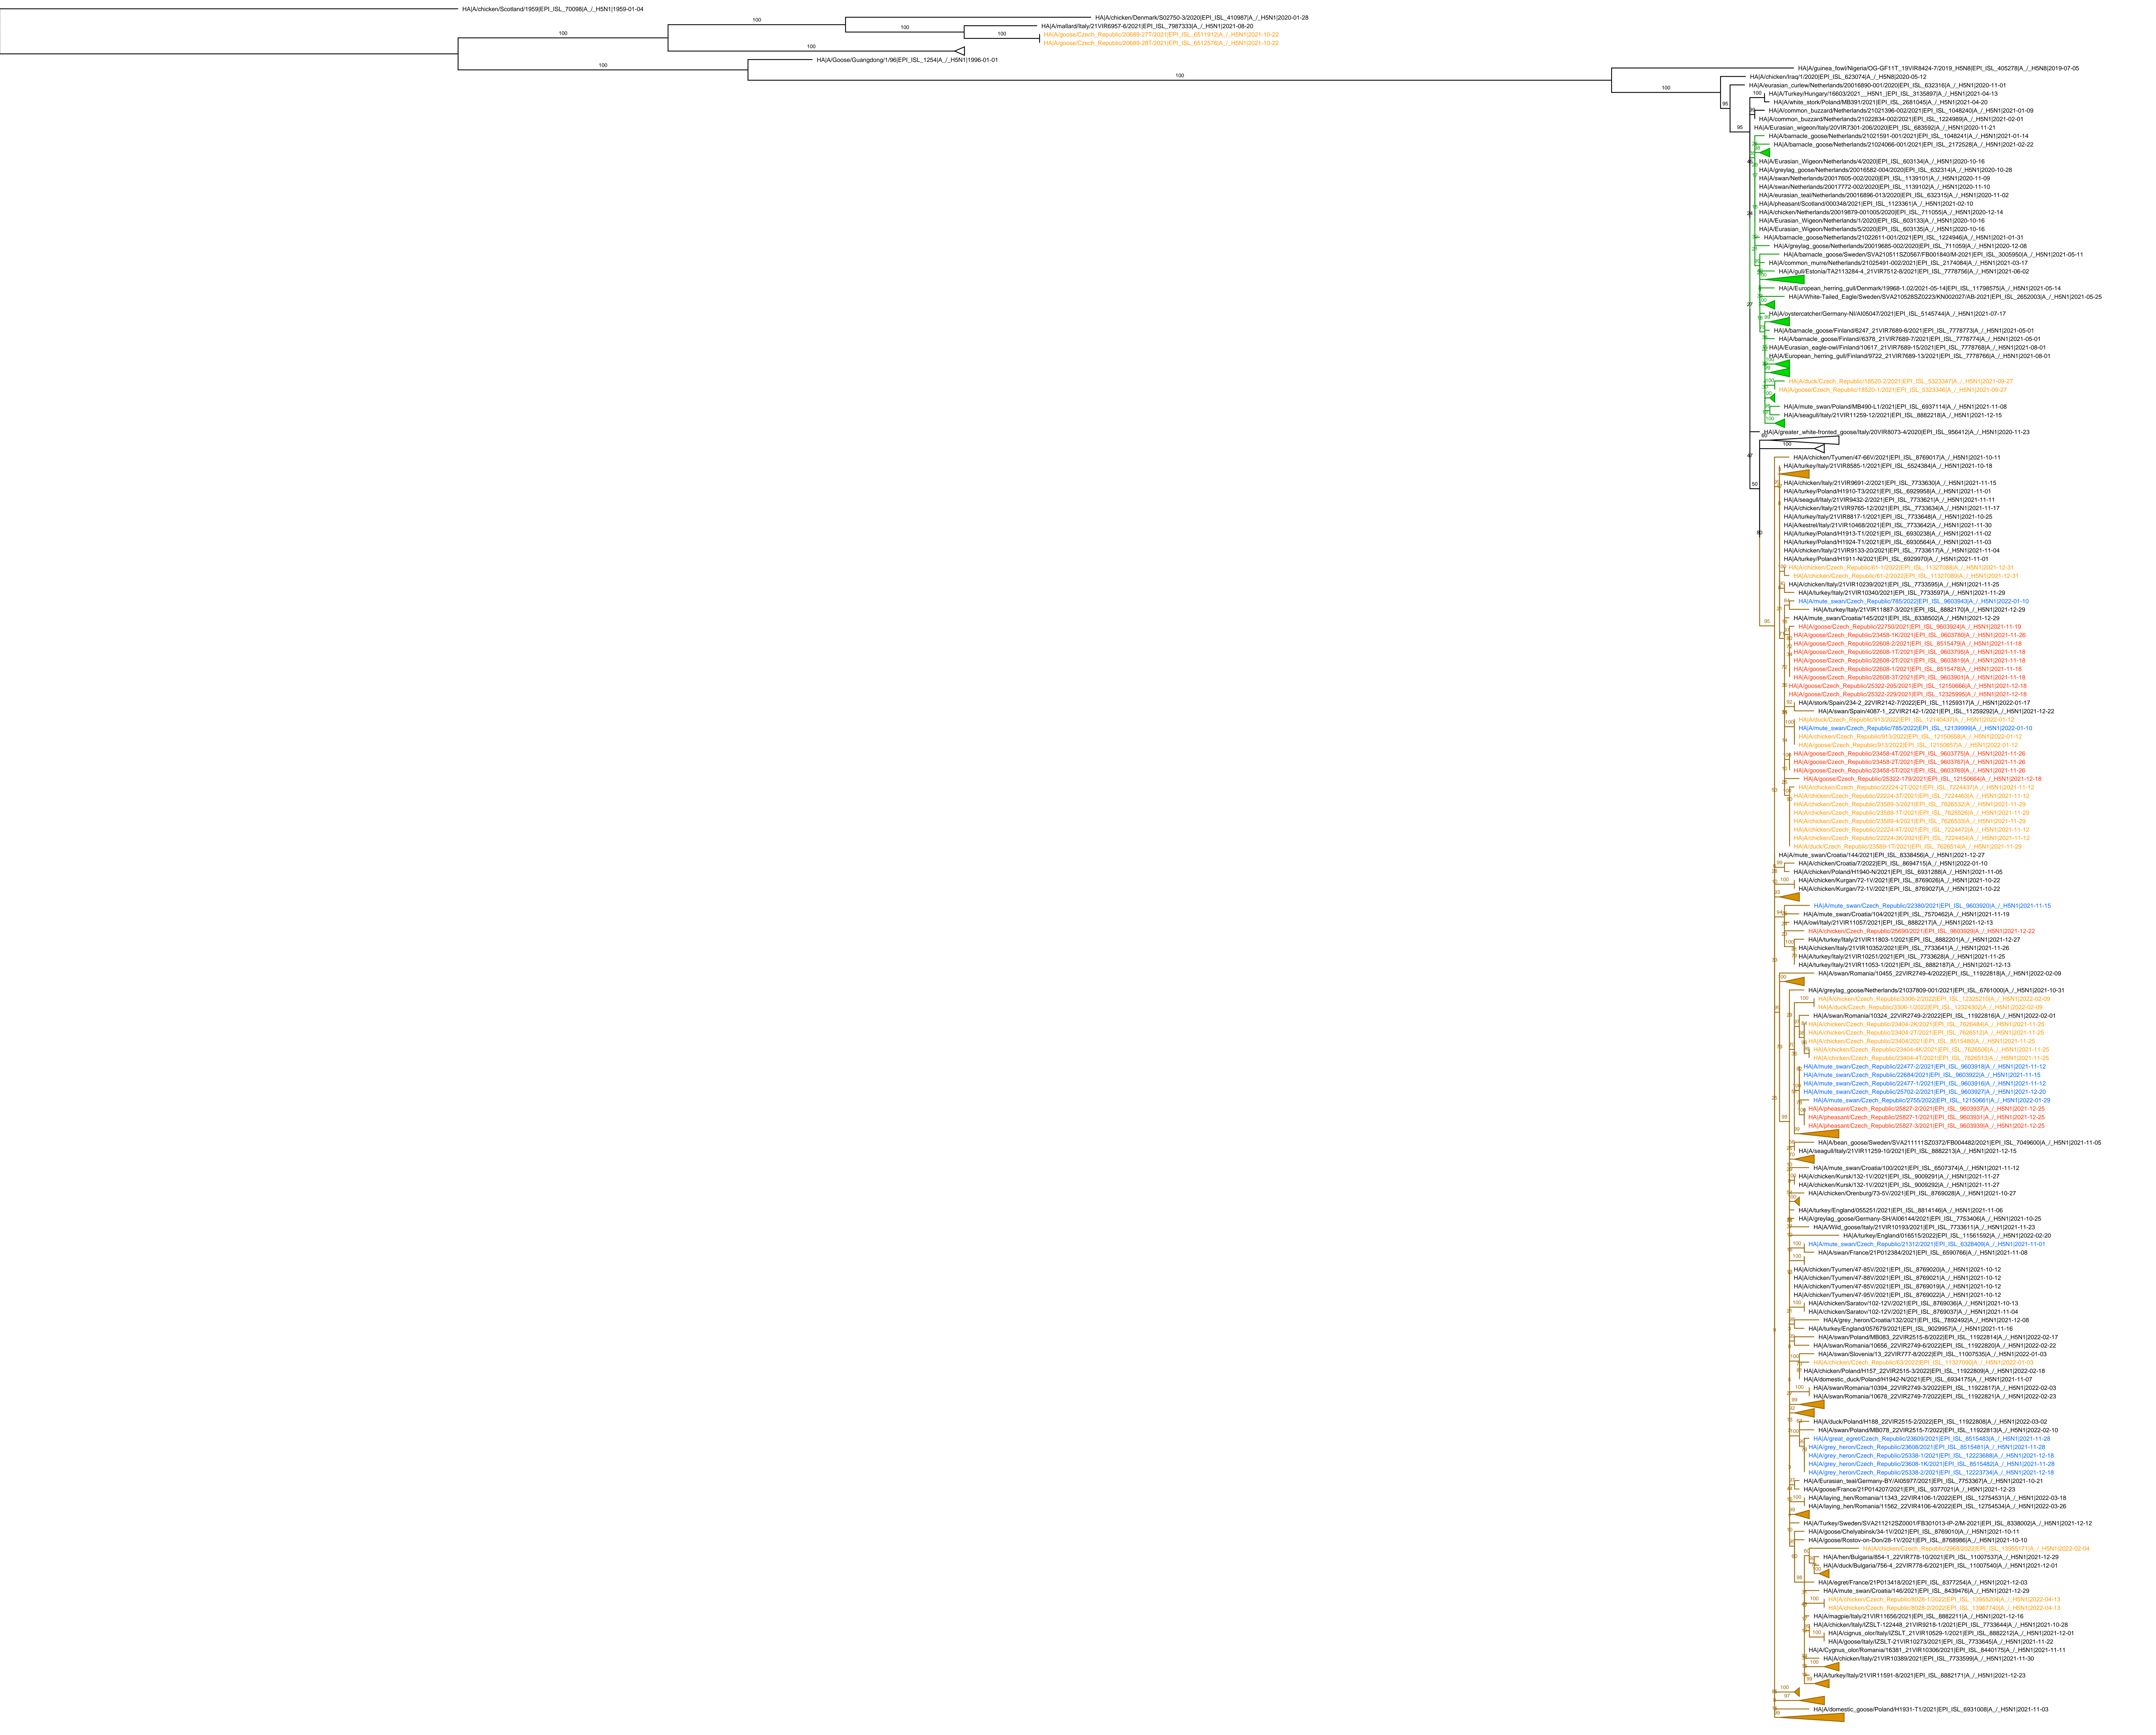





[illegible]

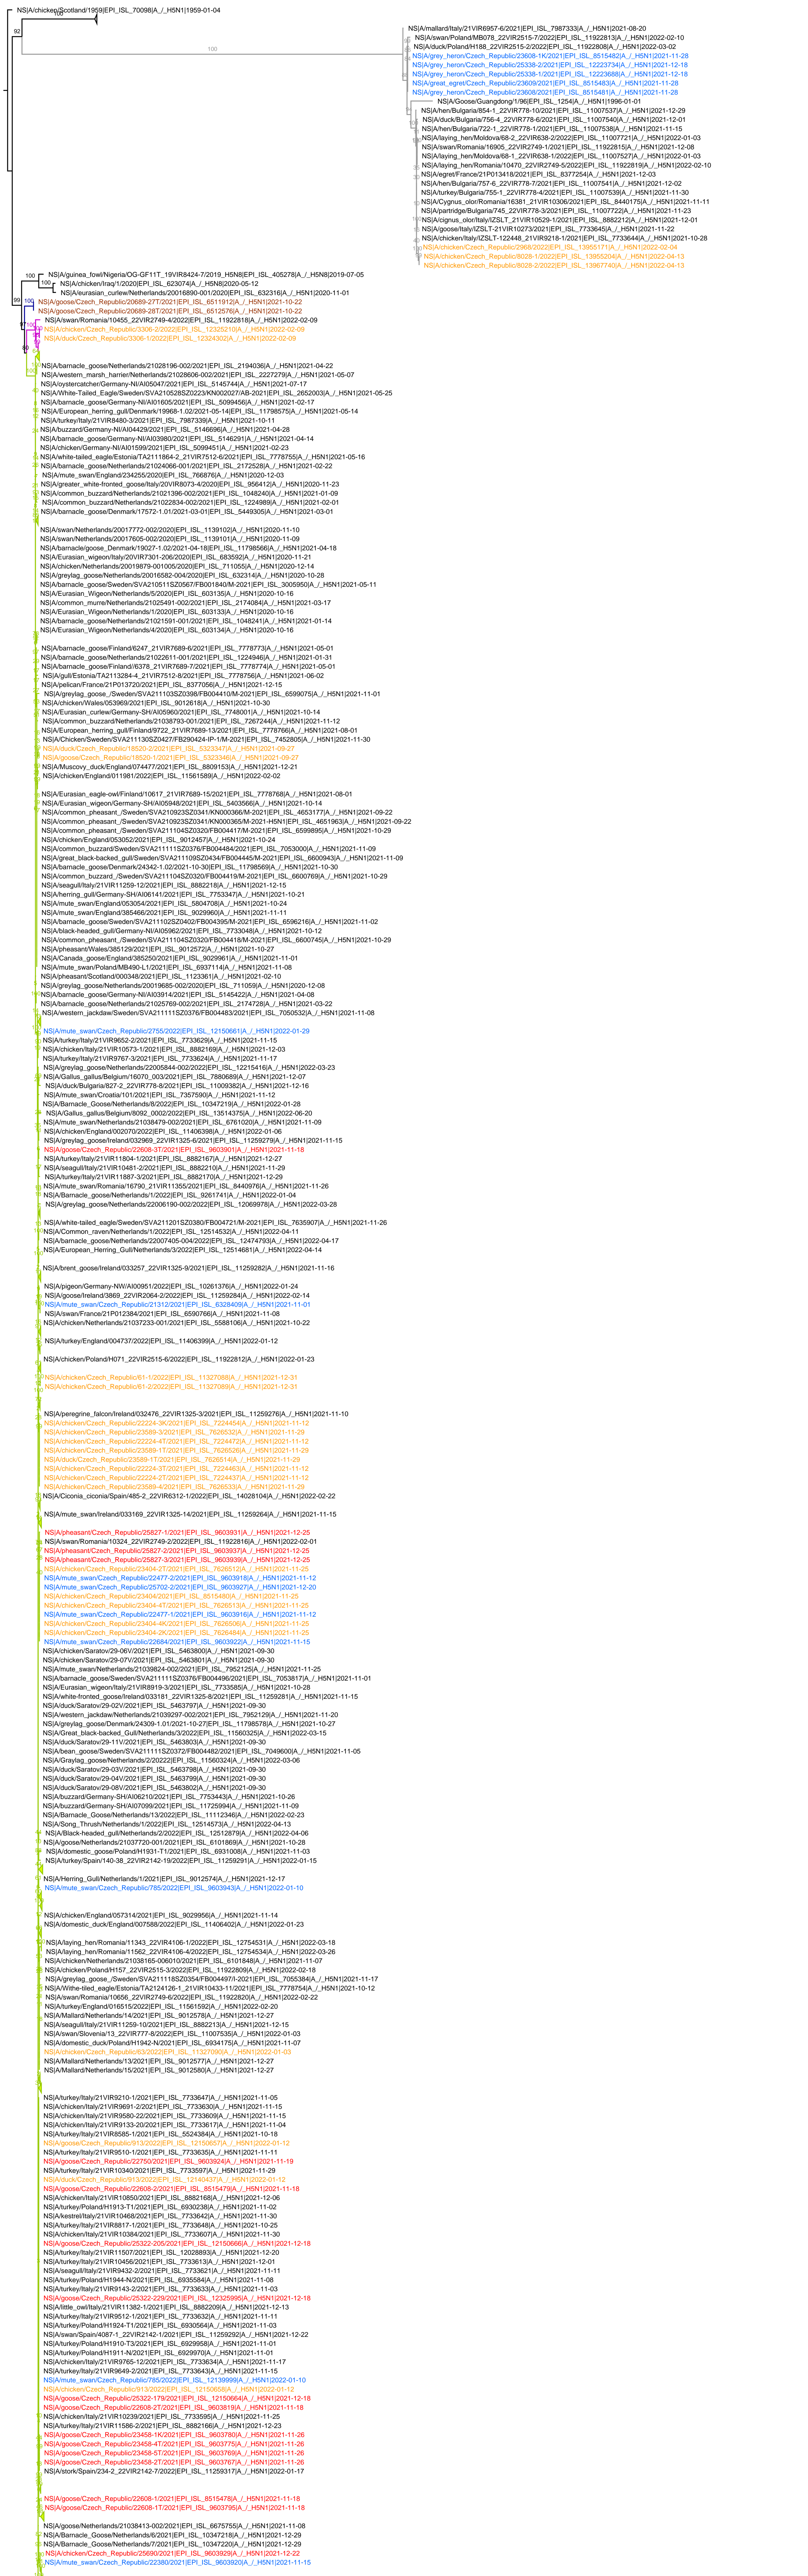

# Supplementary Material 1, Figure 1. Phylogenetic analysis of Czech H5N1 HP/LPAI strains detected during the 2021/2022 influenza season.

The ML tree (Best-fit substitution models according to Bayesian information criterion: PB2: GTR+F+G4; PB1: UNREST+FO+I+G4; PA: UNREST+FO+G4; H5: GTR+F+G4; NP: GTR+F+I+G4; N1: TVM+F+G4; MP: K3P+G4; NS: TVM+F+I+G4) was calculated separately for each genomic segment, based on Eurasian H5N1 sequences collected between September 2021 and Jun 2022 and stored in the GISAID EpiFlu database PB2 n=602, PB1 n=591, PA=593, H5 n=661, NP=590, N1 n=594, MP n=599 and NS n=597. Colouring: red-commercial, orange-backyard, and blue-wild. For each branch, the bootstrap values (1000 replicates) in percentages are indicated. All trees except N1 were rooted to A/chicken/Scotland/1959 H5N1. The N1 tree was rooted to A/goose/Guangdong/1/1996. The branches of the tree corresponding with discrete genotypes were highlighted with a genotype specific colour (Figure 3).

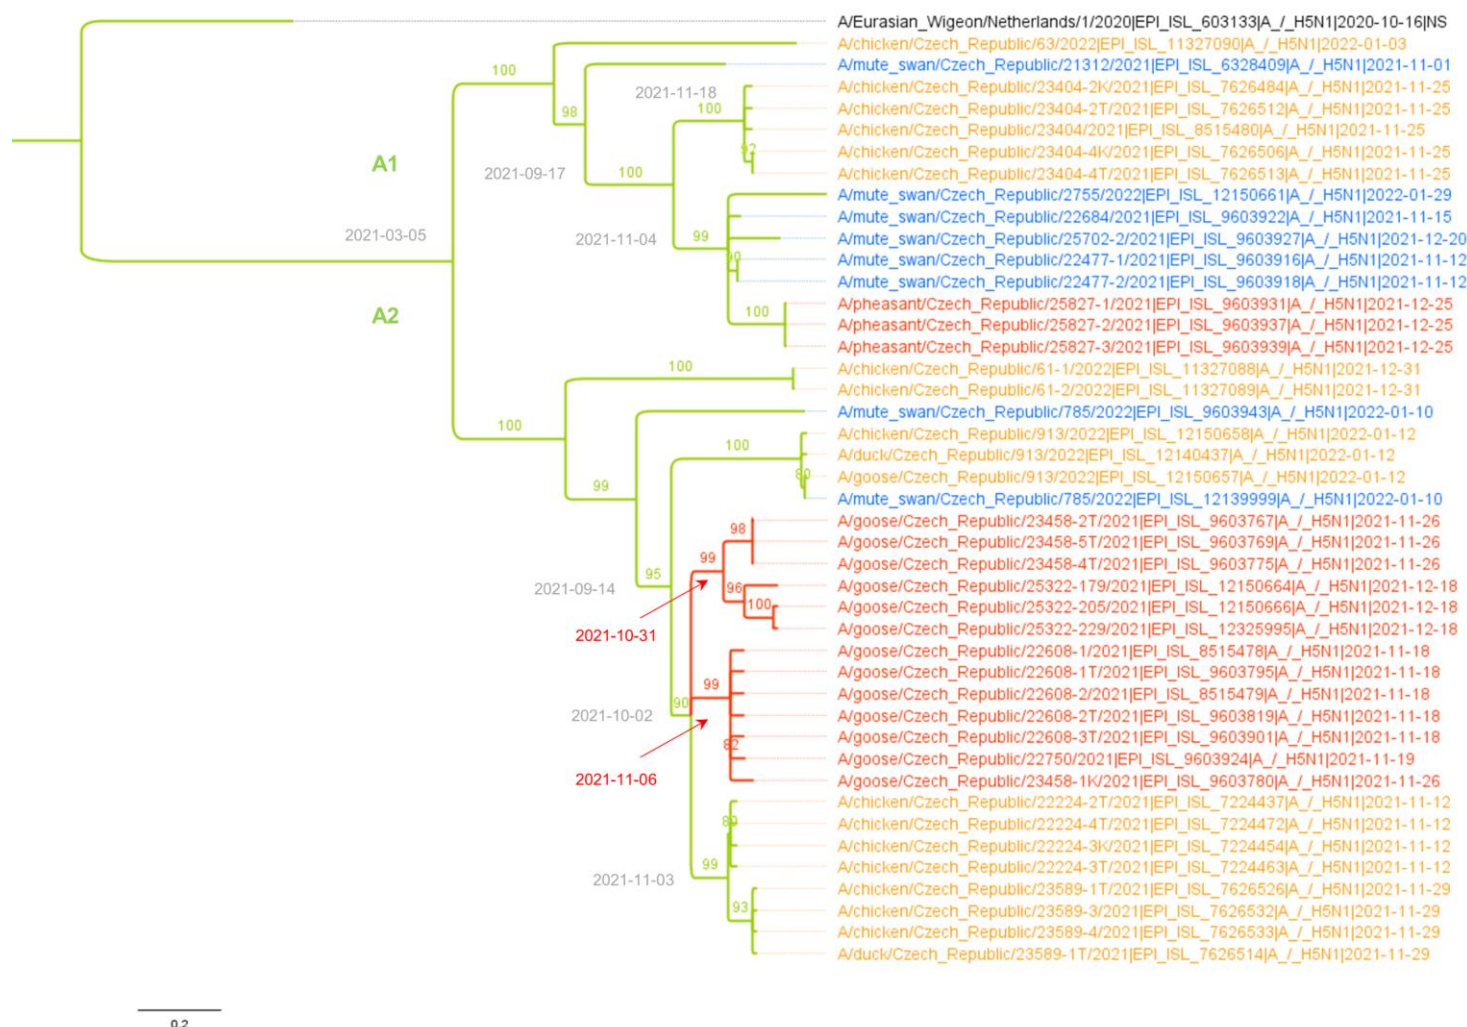

## Supplementary Material 1, Figure 2. Phylogenetic dating.

Concatenated ML tree with the most probable divergence times estimated using the LSD approach. The tree was rooted to the A/ew/NL/1/2020 H5N1 strain. For clarity, only the subtree encompassing genotypes A1 and A2 (Figure 3) was provided. The order of segments in the concatenated genomes is PB2, PB1, PA, H5, NP, N1, MP and NS. The tree was computed using IQ-TREE (GTR+F+R2 as the best fitting model selected according to the Bayesian information criterion) and scaled with branch lengths measured in number of substitutions per site. For each branch, bootstrap values (1000 replicates) were given in percentages. The branches consisted of H5N1 HPAI strains from geese are highlighted red. Virus taxa were highlighted according to origin: red-commercial; orange-backyard; and blue-wild.
