# Supplementary material for: Genotype Diversity, Wild Bird-to-Poultry Transmissions, and Farm-to-Farm Carryover during the Spread of the Highly Pathogenic Avian Influenza H5N1 in the Czech Republic in 2021/2022
Source: Preprints.org preprint supplement (doi:10.20944/preprints202211.0545.v1), 2022-11-29
Supplement: Supplementary file 1 [file Supplementary material 2.xlsx]

## Sheet: PB2
Sequence Identity Matrix
PB2-nt	25338-1	25338-2	23608-1K	23609	23608	25690	22380	20689-27T	20689-28T	3306-2	3306-1	2968	8028-1	8028-2	18520-2	18520-1	63	21312	2755	25702-2	22477-2	22477-1	22684	25827-1	25827-2	25827-3	23404-2K	23404	23404-2T	23404-4K	23404-4T	61-1	61-2	22608-1	22608-2	22608-2T	22608-1T	23458-1K	22608-3T	22750	25322-205	25322-229	23458-4T	23458-5T	23458-2T	25322-179	785	913	913
25338-1	ID	0.999	0.999	0.999	0.999	0.933	0.932	0.925	0.925	0.923	0.923	0.915	0.915	0.915	0.905	0.905	0.901	0.901	0.902	0.901	0.902	0.902	0.902	0.901	0.901	0.901	0.902	0.902	0.902	0.902	0.902	0.9	0.9	0.903	0.903	0.903	0.903	0.903	0.902	0.903	0.902	0.903	0.902	0.902	0.902	0.902	0.902	0.902	0.902
25338-2	0.999	ID	0.999	0.999	0.999	0.932	0.931	0.924	0.925	0.922	0.922	0.914	0.914	0.915	0.905	0.905	0.901	0.901	0.901	0.901	0.902	0.902	0.902	0.901	0.901	0.901	0.902	0.902	0.901	0.901	0.901	0.9	0.9	0.902	0.902	0.902	0.902	0.902	0.902	0.903	0.902	0.902	0.902	0.902	0.902	0.902	0.902	0.902	0.902
23608-1K	0.999	0.999	ID	0.999	0.999	0.932	0.931	0.924	0.925	0.922	0.922	0.914	0.914	0.915	0.905	0.905	0.901	0.901	0.901	0.901	0.902	0.902	0.902	0.901	0.901	0.901	0.902	0.902	0.901	0.901	0.901	0.9	0.9	0.902	0.902	0.902	0.902	0.902	0.902	0.903	0.902	0.902	0.902	0.902	0.902	0.902	0.902	0.902	0.902
23609	0.999	0.999	0.999	ID	1	0.932	0.931	0.924	0.925	0.922	0.922	0.914	0.914	0.915	0.905	0.905	0.901	0.901	0.901	0.901	0.902	0.902	0.902	0.901	0.901	0.901	0.902	0.902	0.901	0.901	0.901	0.9	0.9	0.902	0.902	0.902	0.902	0.902	0.902	0.903	0.902	0.902	0.902	0.902	0.902	0.902	0.902	0.902	0.902
23608	0.999	0.999	0.999	1	ID	0.932	0.931	0.924	0.925	0.922	0.922	0.914	0.914	0.915	0.905	0.905	0.901	0.901	0.901	0.901	0.902	0.902	0.902	0.901	0.901	0.901	0.902	0.902	0.901	0.901	0.901	0.9	0.9	0.902	0.902	0.902	0.902	0.902	0.902	0.903	0.902	0.902	0.902	0.902	0.902	0.902	0.902	0.902	0.902
25690	0.933	0.932	0.932	0.932	0.932	ID	0.996	0.935	0.935	0.935	0.935	0.925	0.925	0.925	0.913	0.913	0.911	0.912	0.913	0.912	0.913	0.913	0.913	0.913	0.913	0.913	0.913	0.913	0.913	0.913	0.913	0.912	0.912	0.914	0.914	0.914	0.914	0.913	0.913	0.913	0.912	0.912	0.913	0.913	0.913	0.913	0.913	0.913	0.913
22380	0.932	0.931	0.931	0.931	0.931	0.996	ID	0.935	0.935	0.935	0.935	0.925	0.925	0.925	0.912	0.912	0.912	0.912	0.913	0.912	0.913	0.913	0.913	0.913	0.913	0.913	0.913	0.913	0.913	0.913	0.913	0.912	0.912	0.914	0.914	0.914	0.914	0.913	0.913	0.913	0.912	0.912	0.913	0.913	0.913	0.913	0.913	0.913	0.913
20689-27T	0.925	0.924	0.924	0.924	0.924	0.935	0.935	ID	0.998	0.978	0.978	0.917	0.917	0.918	0.915	0.915	0.911	0.911	0.912	0.911	0.912	0.912	0.912	0.911	0.911	0.911	0.912	0.912	0.912	0.912	0.912	0.912	0.912	0.913	0.913	0.913	0.913	0.913	0.913	0.913	0.911	0.911	0.912	0.912	0.912	0.912	0.912	0.912	0.912
20689-28T	0.925	0.925	0.925	0.925	0.925	0.935	0.935	0.998	ID	0.977	0.977	0.917	0.917	0.918	0.915	0.915	0.911	0.911	0.912	0.911	0.912	0.912	0.912	0.911	0.911	0.911	0.912	0.912	0.912	0.912	0.912	0.911	0.911	0.912	0.912	0.912	0.912	0.912	0.912	0.912	0.911	0.91	0.911	0.911	0.911	0.911	0.911	0.911	0.911
3306-2	0.923	0.922	0.922	0.922	0.922	0.935	0.935	0.978	0.977	ID	1	0.917	0.917	0.917	0.918	0.918	0.914	0.913	0.915	0.914	0.915	0.915	0.915	0.915	0.915	0.915	0.915	0.914	0.915	0.915	0.915	0.915	0.915	0.915	0.915	0.915	0.915	0.915	0.916	0.916	0.914	0.914	0.915	0.915	0.915	0.915	0.915	0.915	0.915
3306-1	0.923	0.922	0.922	0.922	0.922	0.935	0.935	0.978	0.977	1	ID	0.917	0.917	0.917	0.918	0.918	0.914	0.913	0.915	0.914	0.915	0.915	0.915	0.915	0.915	0.915	0.915	0.914	0.915	0.915	0.915	0.915	0.915	0.915	0.915	0.915	0.915	0.915	0.916	0.916	0.914	0.914	0.915	0.915	0.915	0.915	0.915	0.915	0.915
2968	0.915	0.914	0.914	0.914	0.914	0.925	0.925	0.917	0.917	0.917	0.917	ID	0.999	0.996	0.921	0.921	0.917	0.917	0.919	0.918	0.919	0.919	0.919	0.918	0.918	0.918	0.919	0.919	0.919	0.919	0.919	0.916	0.916	0.918	0.918	0.918	0.918	0.918	0.917	0.918	0.918	0.917	0.918	0.918	0.918	0.918	0.918	0.918	0.918
8028-1	0.915	0.914	0.914	0.914	0.914	0.925	0.925	0.917	0.917	0.917	0.917	0.999	ID	0.997	0.92	0.92	0.916	0.916	0.918	0.918	0.918	0.918	0.918	0.917	0.918	0.918	0.918	0.918	0.918	0.918	0.918	0.915	0.915	0.917	0.917	0.917	0.917	0.917	0.916	0.917	0.917	0.916	0.917	0.917	0.917	0.917	0.917	0.917	0.917
8028-2	0.915	0.915	0.915	0.915	0.915	0.925	0.925	0.918	0.918	0.917	0.917	0.996	0.997	ID	0.92	0.92	0.916	0.916	0.918	0.917	0.918	0.918	0.918	0.917	0.917	0.917	0.918	0.918	0.918	0.918	0.918	0.915	0.915	0.917	0.917	0.917	0.917	0.916	0.915	0.916	0.916	0.916	0.916	0.916	0.916	0.916	0.916	0.916	0.916
18520-2	0.905	0.905	0.905	0.905	0.905	0.913	0.912	0.915	0.915	0.918	0.918	0.921	0.92	0.92	ID	0.998	0.957	0.957	0.957	0.956	0.957	0.957	0.957	0.955	0.955	0.955	0.957	0.957	0.957	0.957	0.957	0.956	0.956	0.958	0.958	0.958	0.958	0.958	0.958	0.959	0.958	0.957	0.959	0.959	0.959	0.959	0.958	0.958	0.958
18520-1	0.905	0.905	0.905	0.905	0.905	0.913	0.912	0.915	0.915	0.918	0.918	0.921	0.92	0.92	0.998	ID	0.958	0.958	0.958	0.958	0.959	0.959	0.959	0.956	0.957	0.957	0.959	0.958	0.958	0.958	0.958	0.957	0.957	0.959	0.959	0.959	0.959	0.959	0.959	0.96	0.959	0.959	0.96	0.96	0.96	0.96	0.959	0.959	0.959
63	0.901	0.901	0.901	0.901	0.901	0.911	0.912	0.911	0.911	0.914	0.914	0.917	0.916	0.916	0.957	0.958	ID	0.995	0.995	0.995	0.996	0.996	0.996	0.993	0.994	0.994	0.995	0.994	0.994	0.994	0.994	0.991	0.991	0.993	0.993	0.993	0.993	0.993	0.992	0.993	0.992	0.992	0.993	0.993	0.993	0.993	0.993	0.993	0.993
21312	0.901	0.901	0.901	0.901	0.901	0.912	0.912	0.911	0.911	0.913	0.913	0.917	0.916	0.916	0.957	0.958	0.995	ID	0.997	0.996	0.997	0.997	0.997	0.995	0.996	0.996	0.996	0.996	0.996	0.996	0.996	0.992	0.992	0.994	0.994	0.994	0.994	0.994	0.993	0.994	0.993	0.993	0.994	0.994	0.994	0.994	0.994	0.994	0.994
2755	0.902	0.901	0.901	0.901	0.901	0.913	0.913	0.912	0.912	0.915	0.915	0.919	0.918	0.918	0.957	0.958	0.995	0.997	ID	0.998	0.999	0.999	0.999	0.997	0.997	0.997	0.998	0.997	0.998	0.998	0.998	0.992	0.992	0.994	0.994	0.994	0.994	0.994	0.993	0.994	0.993	0.993	0.994	0.994	0.994	0.994	0.994	0.994	0.994
25702-2	0.901	0.901	0.901	0.901	0.901	0.912	0.912	0.911	0.911	0.914	0.914	0.918	0.918	0.917	0.956	0.958	0.995	0.996	0.998	ID	0.999	0.999	0.999	0.996	0.997	0.997	0.998	0.997	0.997	0.997	0.997	0.991	0.991	0.994	0.994	0.994	0.994	0.993	0.993	0.993	0.993	0.992	0.993	0.993	0.993	0.993	0.993	0.993	0.993
22477-2	0.902	0.902	0.902	0.902	0.902	0.913	0.913	0.912	0.912	0.915	0.915	0.919	0.918	0.918	0.957	0.959	0.996	0.997	0.999	0.999	ID	1	1	0.997	0.998	0.998	0.999	0.998	0.998	0.998	0.998	0.992	0.992	0.995	0.995	0.995	0.995	0.994	0.993	0.994	0.993	0.993	0.994	0.994	0.994	0.994	0.994	0.994	0.994
22477-1	0.902	0.902	0.902	0.902	0.902	0.913	0.913	0.912	0.912	0.915	0.915	0.919	0.918	0.918	0.957	0.959	0.996	0.997	0.999	0.999	1	ID	1	0.997	0.998	0.998	0.999	0.998	0.998	0.998	0.998	0.992	0.992	0.995	0.995	0.995	0.995	0.994	0.993	0.994	0.993	0.993	0.994	0.994	0.994	0.994	0.994	0.994	0.994
22684	0.902	0.902	0.902	0.902	0.902	0.913	0.913	0.912	0.912	0.915	0.915	0.919	0.918	0.918	0.957	0.959	0.996	0.997	0.999	0.999	1	1	ID	0.997	0.998	0.998	0.999	0.998	0.998	0.998	0.998	0.992	0.992	0.995	0.995	0.995	0.995	0.994	0.993	0.994	0.993	0.993	0.994	0.994	0.994	0.994	0.994	0.994	0.994
25827-1	0.901	0.901	0.901	0.901	0.901	0.913	0.913	0.911	0.911	0.915	0.915	0.918	0.917	0.917	0.955	0.956	0.993	0.995	0.997	0.996	0.997	0.997	0.997	ID	0.999	0.999	0.996	0.996	0.996	0.996	0.996	0.99	0.99	0.993	0.993	0.993	0.993	0.992	0.991	0.992	0.991	0.991	0.992	0.992	0.992	0.992	0.992	0.992	0.992
25827-2	0.901	0.901	0.901	0.901	0.901	0.913	0.913	0.911	0.911	0.915	0.915	0.918	0.918	0.917	0.955	0.957	0.994	0.996	0.997	0.997	0.998	0.998	0.998	0.999	ID	1	0.997	0.996	0.996	0.996	0.996	0.99	0.99	0.993	0.993	0.993	0.993	0.993	0.992	0.993	0.992	0.991	0.993	0.993	0.993	0.993	0.993	0.993	0.993
25827-3	0.901	0.901	0.901	0.901	0.901	0.913	0.913	0.911	0.911	0.915	0.915	0.918	0.918	0.917	0.955	0.957	0.994	0.996	0.997	0.997	0.998	0.998	0.998	0.999	1	ID	0.997	0.996	0.996	0.996	0.996	0.99	0.99	0.993	0.993	0.993	0.993	0.993	0.992	0.993	0.992	0.991	0.993	0.993	0.993	0.993	0.993	0.993	0.993
23404-2K	0.902	0.902	0.902	0.902	0.902	0.913	0.913	0.912	0.912	0.915	0.915	0.919	0.918	0.918	0.957	0.959	0.995	0.996	0.998	0.998	0.999	0.999	0.999	0.996	0.997	0.997	ID	0.999	0.999	0.999	0.999	0.991	0.991	0.994	0.994	0.994	0.994	0.993	0.993	0.993	0.993	0.992	0.993	0.993	0.993	0.993	0.993	0.993	0.993
23404	0.902	0.902	0.902	0.902	0.902	0.913	0.913	0.912	0.912	0.914	0.914	0.919	0.918	0.918	0.957	0.958	0.994	0.996	0.997	0.997	0.998	0.998	0.998	0.996	0.996	0.996	0.999	ID	0.999	0.999	0.999	0.99	0.99	0.993	0.993	0.993	0.993	0.993	0.992	0.993	0.992	0.991	0.993	0.993	0.993	0.993	0.993	0.993	0.993
23404-2T	0.902	0.901	0.901	0.901	0.901	0.913	0.913	0.912	0.912	0.915	0.915	0.919	0.918	0.918	0.957	0.958	0.994	0.996	0.998	0.997	0.998	0.998	0.998	0.996	0.996	0.996	0.999	0.999	ID	0.999	0.999	0.991	0.991	0.993	0.993	0.993	0.993	0.993	0.992	0.993	0.992	0.992	0.993	0.993	0.993	0.993	0.993	0.993	0.993
23404-4K	0.902	0.901	0.901	0.901	0.901	0.913	0.913	0.912	0.912	0.915	0.915	0.919	0.918	0.918	0.957	0.958	0.994	0.996	0.998	0.997	0.998	0.998	0.998	0.996	0.996	0.996	0.999	0.999	0.999	ID	1	0.991	0.991	0.993	0.993	0.993	0.993	0.993	0.992	0.993	0.992	0.992	0.993	0.993	0.993	0.993	0.993	0.993	0.993
23404-4T	0.902	0.901	0.901	0.901	0.901	0.913	0.913	0.912	0.912	0.915	0.915	0.919	0.918	0.918	0.957	0.958	0.994	0.996	0.998	0.997	0.998	0.998	0.998	0.996	0.996	0.996	0.999	0.999	0.999	1	ID	0.991	0.991	0.993	0.993	0.993	0.993	0.993	0.992	0.993	0.992	0.992	0.993	0.993	0.993	0.993	0.993	0.993	0.993
61-1	0.9	0.9	0.9	0.9	0.9	0.912	0.912	0.912	0.911	0.915	0.915	0.916	0.915	0.915	0.956	0.957	0.991	0.992	0.992	0.991	0.992	0.992	0.992	0.99	0.99	0.99	0.991	0.99	0.991	0.991	0.991	ID	1	0.995	0.995	0.995	0.995	0.995	0.994	0.995	0.994	0.993	0.995	0.995	0.995	0.995	0.995	0.995	0.995
61-2	0.9	0.9	0.9	0.9	0.9	0.912	0.912	0.912	0.911	0.915	0.915	0.916	0.915	0.915	0.956	0.957	0.991	0.992	0.992	0.991	0.992	0.992	0.992	0.99	0.99	0.99	0.991	0.99	0.991	0.991	0.991	1	ID	0.995	0.995	0.995	0.995	0.995	0.994	0.995	0.994	0.993	0.995	0.995	0.995	0.995	0.995	0.995	0.995
22608-1	0.903	0.902	0.902	0.902	0.902	0.914	0.914	0.913	0.912	0.915	0.915	0.918	0.917	0.917	0.958	0.959	0.993	0.994	0.994	0.994	0.995	0.995	0.995	0.993	0.993	0.993	0.994	0.993	0.993	0.993	0.993	0.995	0.995	ID	1	1	1	0.999	0.998	0.999	0.998	0.998	0.999	0.999	0.999	0.999	0.999	0.999	0.999
22608-2	0.903	0.902	0.902	0.902	0.902	0.914	0.914	0.913	0.912	0.915	0.915	0.918	0.917	0.917	0.958	0.959	0.993	0.994	0.994	0.994	0.995	0.995	0.995	0.993	0.993	0.993	0.994	0.993	0.993	0.993	0.993	0.995	0.995	1	ID	1	1	0.999	0.998	0.999	0.998	0.998	0.999	0.999	0.999	0.999	0.999	0.999	0.999
22608-2T	0.903	0.902	0.902	0.902	0.902	0.914	0.914	0.913	0.912	0.915	0.915	0.918	0.917	0.917	0.958	0.959	0.993	0.994	0.994	0.994	0.995	0.995	0.995	0.993	0.993	0.993	0.994	0.993	0.993	0.993	0.993	0.995	0.995	1	1	ID	1	0.999	0.998	0.999	0.998	0.998	0.999	0.999	0.999	0.999	0.999	0.999	0.999
22608-1T	0.903	0.902	0.902	0.902	0.902	0.914	0.914	0.913	0.912	0.915	0.915	0.918	0.917	0.917	0.958	0.959	0.993	0.994	0.994	0.994	0.995	0.995	0.995	0.993	0.993	0.993	0.994	0.993	0.993	0.993	0.993	0.995	0.995	1	1	1	ID	0.999	0.998	0.999	0.998	0.998	0.999	0.999	0.999	0.999	0.999	0.999	0.999
23458-1K	0.903	0.902	0.902	0.902	0.902	0.913	0.913	0.913	0.912	0.915	0.915	0.918	0.917	0.916	0.958	0.959	0.993	0.994	0.994	0.993	0.994	0.994	0.994	0.992	0.993	0.993	0.993	0.993	0.993	0.993	0.993	0.995	0.995	0.999	0.999	0.999	0.999	ID	0.998	0.999	0.998	0.997	0.999	0.999	0.999	0.999	0.999	0.999	0.999
22608-3T	0.902	0.902	0.902	0.902	0.902	0.913	0.913	0.913	0.912	0.916	0.916	0.917	0.916	0.915	0.958	0.959	0.992	0.993	0.993	0.993	0.993	0.993	0.993	0.991	0.992	0.992	0.993	0.992	0.992	0.992	0.992	0.994	0.994	0.998	0.998	0.998	0.998	0.998	ID	0.999	0.997	0.996	0.998	0.998	0.998	0.998	0.998	0.998	0.998
22750	0.903	0.903	0.903	0.903	0.903	0.913	0.913	0.913	0.912	0.916	0.916	0.918	0.917	0.916	0.959	0.96	0.993	0.994	0.994	0.993	0.994	0.994	0.994	0.992	0.993	0.993	0.993	0.993	0.993	0.993	0.993	0.995	0.995	0.999	0.999	0.999	0.999	0.999	0.999	ID	0.998	0.997	0.999	0.999	0.999	0.999	0.999	0.999	0.999
25322-205	0.902	0.902	0.902	0.902	0.902	0.912	0.912	0.911	0.911	0.914	0.914	0.918	0.917	0.916	0.958	0.959	0.992	0.993	0.993	0.993	0.993	0.993	0.993	0.991	0.992	0.992	0.993	0.992	0.992	0.992	0.992	0.994	0.994	0.998	0.998	0.998	0.998	0.998	0.997	0.998	ID	0.999	0.999	0.999	0.999	0.999	0.998	0.998	0.998
25322-229	0.903	0.902	0.902	0.902	0.902	0.912	0.912	0.911	0.91	0.914	0.914	0.917	0.916	0.916	0.957	0.959	0.992	0.993	0.993	0.992	0.993	0.993	0.993	0.991	0.991	0.991	0.992	0.991	0.992	0.992	0.992	0.993	0.993	0.998	0.998	0.998	0.998	0.997	0.996	0.997	0.999	ID	0.998	0.998	0.998	0.998	0.997	0.997	0.997
23458-4T	0.902	0.902	0.902	0.902	0.902	0.913	0.913	0.912	0.911	0.915	0.915	0.918	0.917	0.916	0.959	0.96	0.993	0.994	0.994	0.993	0.994	0.994	0.994	0.992	0.993	0.993	0.993	0.993	0.993	0.993	0.993	0.995	0.995	0.999	0.999	0.999	0.999	0.999	0.998	0.999	0.999	0.998	ID	1	1	1	0.999	0.999	0.999
23458-5T	0.902	0.902	0.902	0.902	0.902	0.913	0.913	0.912	0.911	0.915	0.915	0.918	0.917	0.916	0.959	0.96	0.993	0.994	0.994	0.993	0.994	0.994	0.994	0.992	0.993	0.993	0.993	0.993	0.993	0.993	0.993	0.995	0.995	0.999	0.999	0.999	0.999	0.999	0.998	0.999	0.999	0.998	1	ID	1	1	0.999	0.999	0.999
23458-2T	0.902	0.902	0.902	0.902	0.902	0.913	0.913	0.912	0.911	0.915	0.915	0.918	0.917	0.916	0.959	0.96	0.993	0.994	0.994	0.993	0.994	0.994	0.994	0.992	0.993	0.993	0.993	0.993	0.993	0.993	0.993	0.995	0.995	0.999	0.999	0.999	0.999	0.999	0.998	0.999	0.999	0.998	1	1	ID	1	0.999	0.999	0.999
25322-179	0.902	0.902	0.902	0.902	0.902	0.913	0.913	0.912	0.911	0.915	0.915	0.918	0.917	0.916	0.959	0.96	0.993	0.994	0.994	0.993	0.994	0.994	0.994	0.992	0.993	0.993	0.993	0.993	0.993	0.993	0.993	0.995	0.995	0.999	0.999	0.999	0.999	0.999	0.998	0.999	0.999	0.998	1	1	1	ID	0.999	0.999	0.999
785	0.902	0.902	0.902	0.902	0.902	0.913	0.913	0.912	0.911	0.915	0.915	0.918	0.917	0.916	0.958	0.959	0.993	0.994	0.994	0.993	0.994	0.994	0.994	0.992	0.993	0.993	0.993	0.993	0.993	0.993	0.993	0.995	0.995	0.999	0.999	0.999	0.999	0.999	0.998	0.999	0.998	0.997	0.999	0.999	0.999	0.999	ID	1	1
913	0.902	0.902	0.902	0.902	0.902	0.913	0.913	0.912	0.911	0.915	0.915	0.918	0.917	0.916	0.958	0.959	0.993	0.994	0.994	0.993	0.994	0.994	0.994	0.992	0.993	0.993	0.993	0.993	0.993	0.993	0.993	0.995	0.995	0.999	0.999	0.999	0.999	0.999	0.998	0.999	0.998	0.997	0.999	0.999	0.999	0.999	1	ID	1
913	0.902	0.902	0.902	0.902	0.902	0.913	0.913	0.912	0.911	0.915	0.915	0.918	0.917	0.916	0.958	0.959	0.993	0.994	0.994	0.993	0.994	0.994	0.994	0.992	0.993	0.993	0.993	0.993	0.993	0.993	0.993	0.995	0.995	0.999	0.999	0.999	0.999	0.999	0.998	0.999	0.998	0.997	0.999	0.999	0.999	0.999	1	1	ID
913	0.902	0.902	0.902	0.902	0.902	0.913	0.913	0.912	0.911	0.915	0.915	0.918	0.917	0.916	0.958	0.959	0.993	0.994	0.994	0.993	0.994	0.994	0.994	0.992	0.993	0.993	0.993	0.993	0.993	0.993	0.993	0.995	0.995	0.999	0.999	0.999	0.999	0.999	0.998	0.999	0.998	0.997	0.999	0.999	0.999	0.999	1	1	1
785	0.903	0.902	0.902	0.902	0.902	0.913	0.913	0.913	0.912	0.915	0.915	0.917	0.916	0.915	0.957	0.958	0.992	0.993	0.993	0.993	0.993	0.993	0.993	0.991	0.992	0.992	0.993	0.992	0.992	0.992	0.992	0.994	0.994	0.998	0.998	0.998	0.998	0.998	0.997	0.998	0.997	0.996	0.998	0.998	0.998	0.998	0.998	0.998	0.998
22224-3K	0.902	0.901	0.901	0.901	0.901	0.913	0.913	0.912	0.911	0.915	0.915	0.917	0.916	0.916	0.957	0.959	0.993	0.993	0.993	0.993	0.994	0.994	0.994	0.992	0.992	0.992	0.993	0.992	0.993	0.993	0.993	0.994	0.994	0.999	0.999	0.999	0.999	0.998	0.997	0.998	0.997	0.997	0.998	0.998	0.998	0.998	0.998	0.998	0.998
22224-2T	0.902	0.901	0.901	0.901	0.901	0.913	0.913	0.912	0.911	0.915	0.915	0.917	0.916	0.916	0.957	0.959	0.993	0.993	0.993	0.993	0.994	0.994	0.994	0.992	0.992	0.992	0.993	0.992	0.993	0.993	0.993	0.994	0.994	0.999	0.999	0.999	0.999	0.998	0.997	0.998	0.997	0.997	0.998	0.998	0.998	0.998	0.998	0.998	0.998
22224-3T	0.902	0.901	0.901	0.901	0.901	0.913	0.913	0.912	0.911	0.915	0.915	0.917	0.916	0.916	0.957	0.959	0.993	0.993	0.993	0.993	0.994	0.994	0.994	0.992	0.992	0.992	0.993	0.992	0.993	0.993	0.993	0.994	0.994	0.999	0.999	0.999	0.999	0.998	0.997	0.998	0.997	0.997	0.998	0.998	0.998	0.998	0.998	0.998	0.998
22224-4T	0.901	0.901	0.901	0.901	0.901	0.912	0.912	0.911	0.911	0.914	0.914	0.917	0.916	0.915	0.957	0.958	0.992	0.993	0.993	0.993	0.993	0.993	0.993	0.991	0.992	0.992	0.993	0.992	0.992	0.992	0.992	0.994	0.994	0.998	0.998	0.998	0.998	0.998	0.997	0.998	0.997	0.996	0.998	0.998	0.998	0.998	0.998	0.998	0.998
23589-3	0.901	0.901	0.901	0.901	0.901	0.913	0.913	0.911	0.911	0.914	0.914	0.916	0.915	0.915	0.956	0.957	0.991	0.992	0.992	0.992	0.993	0.993	0.993	0.991	0.991	0.991	0.992	0.991	0.991	0.991	0.991	0.993	0.993	0.997	0.997	0.997	0.997	0.997	0.996	0.997	0.996	0.996	0.997	0.997	0.997	0.997	0.997	0.997	0.997
23589-4	0.901	0.901	0.901	0.901	0.901	0.913	0.913	0.911	0.911	0.914	0.914	0.916	0.915	0.915	0.956	0.958	0.992	0.993	0.993	0.992	0.993	0.993	0.993	0.991	0.991	0.991	0.992	0.991	0.992	0.992	0.992	0.993	0.993	0.998	0.998	0.998	0.998	0.997	0.996	0.997	0.996	0.996	0.997	0.997	0.997	0.997	0.997	0.997	0.997
23589-1T	0.901	0.901	0.901	0.901	0.901	0.913	0.913	0.911	0.911	0.914	0.914	0.916	0.915	0.915	0.956	0.958	0.992	0.993	0.993	0.992	0.993	0.993	0.993	0.991	0.991	0.991	0.992	0.991	0.992	0.992	0.992	0.993	0.993	0.998	0.998	0.998	0.998	0.997	0.996	0.997	0.996	0.996	0.997	0.997	0.997	0.997	0.997	0.997	0.997
23589-1T	0.901	0.901	0.901	0.901	0.901	0.913	0.913	0.911	0.911	0.914	0.914	0.916	0.915	0.915	0.956	0.958	0.992	0.993	0.993	0.992	0.993	0.993	0.993	0.991	0.991	0.991	0.992	0.991	0.992	0.992	0.992	0.993	0.993	0.998	0.998	0.998	0.998	0.997	0.996	0.997	0.996	0.996	0.997	0.997	0.997	0.997	0.997	0.997	0.997
Sequence Difference Count Matrix
PB2-nt	25338-1	25338-2	23608-1K	23609	23608	25690	22380	20689-27T	20689-28T	3306-2	3306-1	2968	8028-1	8028-2	18520-2	18520-1	63	21312	2755	25702-2	22477-2	22477-1	22684	25827-1	25827-2	25827-3	23404-2K	23404	23404-2T	23404-4K	23404-4T	61-1	61-2	22608-1	22608-2	22608-2T	22608-1T	23458-1K	22608-3T	22750	25322-205	25322-229	23458-4T	23458-5T	23458-2T	25322-179	785	913	913
25338-1	ID	1	2	1	1	153	156	172	171	176	176	195	195	194	217	216	226	225	224	225	223	223	223	226	225	225	223	223	224	224	224	228	228	222	222	222	222	222	223	221	223	222	223	223	223	223	223	223	223
25338-2	1	ID	2	1	1	154	157	173	172	177	177	196	196	195	218	217	227	226	225	226	224	224	224	227	226	226	224	224	225	225	225	229	229	223	223	223	223	223	224	222	224	223	224	224	224	224	224	224	224
23608-1K	2	2	ID	1	1	154	157	173	172	177	177	196	196	195	218	217	227	226	225	226	224	224	224	227	226	226	224	224	225	225	225	229	229	223	223	223	223	223	224	222	224	223	224	224	224	224	224	224	224
23609	1	1	1	ID	0	154	157	173	172	177	177	196	196	195	218	217	227	226	225	226	224	224	224	227	226	226	224	224	225	225	225	229	229	223	223	223	223	223	224	222	224	223	224	224	224	224	224	224	224
23608	1	1	1	0	ID	154	157	173	172	177	177	196	196	195	218	217	227	226	225	226	224	224	224	227	226	226	224	224	225	225	225	229	229	223	223	223	223	223	224	222	224	223	224	224	224	224	224	224	224
25690	153	154	154	154	154	ID	7	147	148	148	148	171	171	172	199	199	202	201	199	200	198	198	198	199	198	198	198	198	199	199	199	201	201	197	197	197	197	198	198	198	200	201	198	198	198	198	198	198	198
22380	156	157	157	157	157	7	ID	148	149	147	147	170	170	171	201	201	201	201	199	200	198	198	198	199	198	198	198	198	199	199	199	201	201	197	197	197	197	198	198	198	200	201	198	198	198	198	198	198	198
20689-27T	172	173	173	173	173	147	148	ID	3	50	50	190	190	188	194	194	203	204	201	202	200	200	200	203	202	202	200	200	201	201	201	201	201	199	199	199	199	199	198	198	202	203	200	200	200	200	200	200	200
20689-28T	171	172	172	172	172	148	149	3	ID	51	51	190	190	188	194	194	203	204	201	202	200	200	200	203	202	202	200	200	201	201	201	203	203	201	201	201	201	201	200	200	204	205	202	202	202	202	202	202	202
3306-2	176	177	177	177	177	148	147	50	51	ID	0	190	190	190	188	186	197	198	195	196	194	194	194	195	194	194	194	196	195	195	195	195	195	193	193	193	193	193	192	192	196	197	194	194	194	194	194	194	194
3306-1	176	177	177	177	177	148	147	50	51	0	ID	190	190	190	188	186	197	198	195	196	194	194	194	195	194	194	194	196	195	195	195	195	195	193	193	193	193	193	192	192	196	197	194	194	194	194	194	194	194
2968	195	196	196	196	196	171	170	190	190	190	190	ID	2	8	181	181	189	189	185	186	184	184	184	187	186	186	184	184	185	185	185	191	191	187	187	187	187	188	190	188	188	189	188	188	188	188	188	188	188
8028-1	195	196	196	196	196	171	170	190	190	190	190	2	ID	6	183	183	191	191	187	188	186	186	186	189	188	188	186	186	187	187	187	193	193	189	189	189	189	190	192	190	190	191	190	190	190	190	190	190	190
8028-2	194	195	195	195	195	172	171	188	188	190	190	8	6	ID	183	183	192	192	188	189	187	187	187	190	189	189	187	187	188	188	188	194	194	190	190	190	190	191	193	191	191	192	191	191	191	191	191	191	191
18520-2	217	218	218	218	218	199	201	194	194	188	188	181	183	183	ID	3	98	98	98	99	97	97	97	102	101	101	97	97	98	98	98	100	100	95	95	95	95	95	96	94	96	97	94	94	94	94	96	96	96
18520-1	216	217	217	217	217	199	201	194	194	186	186	181	183	183	3	ID	95	95	95	96	94	94	94	99	98	98	94	96	95	95	95	97	97	92	92	92	92	92	93	91	93	94	91	91	91	91	93	93	93
63	226	227	227	227	227	202	201	203	203	197	197	189	191	192	98	95	ID	10	10	11	9	9	9	14	13	13	11	13	12	12	12	20	20	14	14	14	14	15	17	15	17	18	15	15	15	15	15	15	15
21312	225	226	226	226	226	201	201	204	204	198	198	189	191	192	98	95	10	ID	6	7	5	5	5	10	9	9	7	9	8	8	8	18	18	12	12	12	12	13	15	13	15	16	13	13	13	13	13	13	13
2755	224	225	225	225	225	199	199	201	201	195	195	185	187	188	98	95	10	6	ID	3	1	1	1	6	5	5	3	5	4	4	4	18	18	12	12	12	12	13	15	13	15	16	13	13	13	13	13	13	13
25702-2	225	226	226	226	226	200	200	202	202	196	196	186	188	189	99	96	11	7	3	ID	2	2	2	7	6	6	4	6	5	5	5	19	19	13	13	13	13	14	16	14	16	17	14	14	14	14	14	14	14
22477-2	223	224	224	224	224	198	198	200	200	194	194	184	186	187	97	94	9	5	1	2	ID	0	0	5	4	4	2	4	3	3	3	17	17	11	11	11	11	12	14	12	14	15	12	12	12	12	12	12	12
22477-1	223	224	224	224	224	198	198	200	200	194	194	184	186	187	97	94	9	5	1	2	0	ID	0	5	4	4	2	4	3	3	3	17	17	11	11	11	11	12	14	12	14	15	12	12	12	12	12	12	12
22684	223	224	224	224	224	198	198	200	200	194	194	184	186	187	97	94	9	5	1	2	0	0	ID	5	4	4	2	4	3	3	3	17	17	11	11	11	11	12	14	12	14	15	12	12	12	12	12	12	12
25827-1	226	227	227	227	227	199	199	203	203	195	195	187	189	190	102	99	14	10	6	7	5	5	5	ID	1	1	7	9	8	8	8	22	22	16	16	16	16	17	19	17	19	20	17	17	17	17	17	17	17
25827-2	225	226	226	226	226	198	198	202	202	194	194	186	188	189	101	98	13	9	5	6	4	4	4	1	ID	0	6	8	7	7	7	21	21	15	15	15	15	16	18	16	18	19	16	16	16	16	16	16	16
25827-3	225	226	226	226	226	198	198	202	202	194	194	186	188	189	101	98	13	9	5	6	4	4	4	1	0	ID	6	8	7	7	7	21	21	15	15	15	15	16	18	16	18	19	16	16	16	16	16	16	16
23404-2K	223	224	224	224	224	198	198	200	200	194	194	184	186	187	97	94	11	7	3	4	2	2	2	7	6	6	ID	2	1	1	1	19	19	13	13	13	13	14	16	14	16	17	14	14	14	14	14	14	14
23404	223	224	224	224	224	198	198	200	200	196	196	184	186	187	97	96	13	9	5	6	4	4	4	9	8	8	2	ID	1	2	2	21	21	15	15	15	15	16	18	16	18	19	16	16	16	16	16	16	16
23404-2T	224	225	225	225	225	199	199	201	201	195	195	185	187	188	98	95	12	8	4	5	3	3	3	8	7	7	1	1	ID	1	1	20	20	14	14	14	14	15	17	15	17	18	15	15	15	15	15	15	15
23404-4K	224	225	225	225	225	199	199	201	201	195	195	185	187	188	98	95	12	8	4	5	3	3	3	8	7	7	1	2	1	ID	0	20	20	14	14	14	14	15	17	15	17	18	15	15	15	15	15	15	15
23404-4T	224	225	225	225	225	199	199	201	201	195	195	185	187	188	98	95	12	8	4	5	3	3	3	8	7	7	1	2	1	0	ID	20	20	14	14	14	14	15	17	15	17	18	15	15	15	15	15	15	15
61-1	228	229	229	229	229	201	201	201	203	195	195	191	193	194	100	97	20	18	18	19	17	17	17	22	21	21	19	21	20	20	20	ID	0	10	10	10	10	11	13	11	13	14	11	11	11	11	11	11	11
61-2	228	229	229	229	229	201	201	201	203	195	195	191	193	194	100	97	20	18	18	19	17	17	17	22	21	21	19	21	20	20	20	0	ID	10	10	10	10	11	13	11	13	14	11	11	11	11	11	11	11
22608-1	222	223	223	223	223	197	197	199	201	193	193	187	189	190	95	92	14	12	12	13	11	11	11	16	15	15	13	15	14	14	14	10	10	ID	0	0	0	1	3	1	3	4	1	1	1	1	1	1	1
22608-2	222	223	223	223	223	197	197	199	201	193	193	187	189	190	95	92	14	12	12	13	11	11	11	16	15	15	13	15	14	14	14	10	10	0	ID	0	0	1	3	1	3	4	1	1	1	1	1	1	1
22608-2T	222	223	223	223	223	197	197	199	201	193	193	187	189	190	95	92	14	12	12	13	11	11	11	16	15	15	13	15	14	14	14	10	10	0	0	ID	0	1	3	1	3	4	1	1	1	1	1	1	1
22608-1T	222	223	223	223	223	197	197	199	201	193	193	187	189	190	95	92	14	12	12	13	11	11	11	16	15	15	13	15	14	14	14	10	10	0	0	0	ID	1	3	1	3	4	1	1	1	1	1	1	1
23458-1K	222	223	223	223	223	198	198	199	201	193	193	188	190	191	95	92	15	13	13	14	12	12	12	17	16	16	14	16	15	15	15	11	11	1	1	1	1	ID	3	1	4	5	2	2	2	2	2	2	2
22608-3T	223	224	224	224	224	198	198	198	200	192	192	190	192	193	96	93	17	15	15	16	14	14	14	19	18	18	16	18	17	17	17	13	13	3	3	3	3	3	ID	2	6	7	4	4	4	4	4	4	4
22750	221	222	222	222	222	198	198	198	200	192	192	188	190	191	94	91	15	13	13	14	12	12	12	17	16	16	14	16	15	15	15	11	11	1	1	1	1	1	2	ID	4	5	2	2	2	2	2	2	2
25322-205	223	224	224	224	224	200	200	202	204	196	196	188	190	191	96	93	17	15	15	16	14	14	14	19	18	18	16	18	17	17	17	13	13	3	3	3	3	4	6	4	ID	1	2	2	2	2	4	4	4
25322-229	222	223	223	223	223	201	201	203	205	197	197	189	191	192	97	94	18	16	16	17	15	15	15	20	19	19	17	19	18	18	18	14	14	4	4	4	4	5	7	5	1	ID	3	3	3	3	5	5	5
23458-4T	223	224	224	224	224	198	198	200	202	194	194	188	190	191	94	91	15	13	13	14	12	12	12	17	16	16	14	16	15	15	15	11	11	1	1	1	1	2	4	2	2	3	ID	0	0	0	2	2	2
23458-5T	223	224	224	224	224	198	198	200	202	194	194	188	190	191	94	91	15	13	13	14	12	12	12	17	16	16	14	16	15	15	15	11	11	1	1	1	1	2	4	2	2	3	0	ID	0	0	2	2	2
23458-2T	223	224	224	224	224	198	198	200	202	194	194	188	190	191	94	91	15	13	13	14	12	12	12	17	16	16	14	16	15	15	15	11	11	1	1	1	1	2	4	2	2	3	0	0	ID	0	2	2	2
25322-179	223	224	224	224	224	198	198	200	202	194	194	188	190	191	94	91	15	13	13	14	12	12	12	17	16	16	14	16	15	15	15	11	11	1	1	1	1	2	4	2	2	3	0	0	0	ID	2	2	2
785	223	224	224	224	224	198	198	200	202	194	194	188	190	191	96	93	15	13	13	14	12	12	12	17	16	16	14	16	15	15	15	11	11	1	1	1	1	2	4	2	4	5	2	2	2	2	ID	0	0
913	223	224	224	224	224	198	198	200	202	194	194	188	190	191	96	93	15	13	13	14	12	12	12	17	16	16	14	16	15	15	15	11	11	1	1	1	1	2	4	2	4	5	2	2	2	2	0	ID	0
913	223	224	224	224	224	198	198	200	202	194	194	188	190	191	96	93	15	13	13	14	12	12	12	17	16	16	14	16	15	15	15	11	11	1	1	1	1	2	4	2	4	5	2	2	2	2	0	0	ID
913	223	224	224	224	224	198	198	200	202	194	194	188	190	191	96	93	15	13	13	14	12	12	12	17	16	16	14	16	15	15	15	11	11	1	1	1	1	2	4	2	4	5	2	2	2	2	0	0	0
785	222	223	223	223	223	199	199	199	201	193	193	190	192	193	98	95	17	15	15	16	14	14	14	19	18	18	16	18	17	17	17	13	13	3	3	3	3	4	6	4	6	7	4	4	4	4	4	4	4
22224-3K	224	225	225	225	225	199	199	201	203	195	195	189	191	192	97	94	16	14	14	15	13	13	13	18	17	17	15	17	16	16	16	12	12	2	2	2	2	3	5	3	5	6	3	3	3	3	3	3	3
22224-2T	224	225	225	225	225	199	199	201	203	195	195	189	191	192	97	94	16	14	14	15	13	13	13	18	17	17	15	17	16	16	16	12	12	2	2	2	2	3	5	3	5	6	3	3	3	3	3	3	3
22224-3T	224	225	225	225	225	199	199	201	203	195	195	189	191	192	97	94	16	14	14	15	13	13	13	18	17	17	15	17	16	16	16	12	12	2	2	2	2	3	5	3	5	6	3	3	3	3	3	3	3
22224-4T	225	226	226	226	226	200	200	202	204	196	196	190	192	193	98	95	17	15	15	16	14	14	14	19	18	18	16	18	17	17	17	13	13	3	3	3	3	4	6	4	6	7	4	4	4	4	4	4	4
23589-3	225	226	226	226	226	198	198	202	204	196	196	192	194	195	100	97	19	17	17	18	16	16	16	20	19	19	18	20	19	19	19	15	15	5	5	5	5	6	8	6	8	9	6	6	6	6	6	6	6
23589-4	225	226	226	226	226	198	198	202	204	196	196	191	193	194	99	96	18	16	16	17	15	15	15	20	19	19	17	19	18	18	18	14	14	4	4	4	4	5	7	5	7	8	5	5	5	5	5	5	5
23589-1T	225	226	226	226	226	198	198	202	204	196	196	191	193	194	99	96	18	16	16	17	15	15	15	20	19	19	17	19	18	18	18	14	14	4	4	4	4	5	7	5	7	8	5	5	5	5	5	5	5
23589-1T	225	226	226	226	226	198	198	202	204	196	196	191	193	194	99	96	18	16	16	17	15	15	15	20	19	19	17	19	18	18	18	14	14	4	4	4	4	5	7	5	7	8	5	5	5	5	5	5	5
[truncated: 70 more columns]

## Sheet: PB1
Sequence Identity Matrix
PB1-nt	20689-27T	20689-28T	2968	8028-1	8028-2	22380	25690	18520-2	18520-1	25338-1	25338-2	23609	23608	23608-1K	3306-2	3306-1	63	21312	23404	23404-2T	23404-4K	23404-2K	23404-4T	22477-2	22684	22477-1	25702-2	2755	25827-2	25827-1	25827-3	61-1	61-2	785	22608-1	22608-2	22224-3T	22608-3T	22750	22224-2T	913	785	913	913	23589-1T	22608-2T	23589-3	23589-1T	23589-4
20689-27T	ID	0.998	0.978	0.978	0.978	0.926	0.925	0.922	0.923	0.923	0.923	0.923	0.923	0.923	0.924	0.924	0.923	0.923	0.924	0.924	0.924	0.924	0.924	0.923	0.923	0.923	0.923	0.923	0.923	0.923	0.923	0.921	0.921	0.922	0.922	0.923	0.923	0.923	0.923	0.923	0.922	0.923	0.922	0.922	0.923	0.923	0.923	0.923	0.923
20689-28T	0.998	ID	0.979	0.979	0.979	0.925	0.924	0.922	0.922	0.923	0.923	0.923	0.923	0.923	0.923	0.923	0.923	0.923	0.924	0.923	0.923	0.923	0.923	0.923	0.923	0.923	0.923	0.923	0.922	0.922	0.922	0.921	0.921	0.922	0.922	0.922	0.923	0.923	0.923	0.923	0.922	0.923	0.922	0.922	0.923	0.923	0.923	0.923	0.923
2968	0.978	0.979	ID	0.998	0.998	0.927	0.926	0.928	0.928	0.928	0.928	0.928	0.928	0.928	0.929	0.929	0.928	0.928	0.929	0.929	0.929	0.929	0.929	0.928	0.928	0.928	0.928	0.928	0.927	0.927	0.927	0.925	0.925	0.926	0.926	0.926	0.927	0.926	0.927	0.927	0.926	0.927	0.926	0.926	0.927	0.927	0.927	0.927	0.927
8028-1	0.978	0.979	0.998	ID	1	0.927	0.926	0.927	0.928	0.928	0.928	0.928	0.928	0.928	0.928	0.928	0.928	0.928	0.929	0.928	0.928	0.928	0.928	0.927	0.927	0.927	0.927	0.927	0.927	0.927	0.927	0.925	0.925	0.926	0.926	0.926	0.927	0.926	0.926	0.927	0.926	0.927	0.926	0.926	0.927	0.927	0.927	0.927	0.927
8028-2	0.978	0.979	0.998	1	ID	0.927	0.926	0.927	0.928	0.928	0.928	0.928	0.928	0.928	0.928	0.928	0.928	0.928	0.929	0.928	0.928	0.928	0.928	0.927	0.927	0.927	0.927	0.927	0.927	0.927	0.927	0.925	0.925	0.926	0.926	0.926	0.927	0.926	0.926	0.927	0.926	0.927	0.926	0.926	0.927	0.927	0.927	0.927	0.927
22380	0.926	0.925	0.927	0.927	0.927	ID	0.998	0.959	0.959	0.957	0.957	0.957	0.957	0.957	0.956	0.956	0.956	0.957	0.956	0.956	0.956	0.956	0.956	0.956	0.956	0.956	0.956	0.956	0.955	0.955	0.955	0.956	0.956	0.956	0.956	0.957	0.958	0.956	0.957	0.957	0.956	0.956	0.956	0.956	0.958	0.958	0.958	0.958	0.958
25690	0.925	0.924	0.926	0.926	0.926	0.998	ID	0.957	0.958	0.956	0.956	0.956	0.956	0.956	0.955	0.955	0.956	0.956	0.955	0.955	0.955	0.955	0.955	0.956	0.956	0.956	0.956	0.956	0.954	0.954	0.954	0.954	0.954	0.956	0.956	0.956	0.957	0.956	0.956	0.956	0.956	0.955	0.956	0.956	0.957	0.957	0.957	0.957	0.957
18520-2	0.922	0.922	0.928	0.927	0.927	0.959	0.957	ID	0.999	0.989	0.989	0.989	0.989	0.989	0.988	0.988	0.989	0.989	0.988	0.988	0.988	0.988	0.988	0.989	0.989	0.989	0.989	0.988	0.988	0.988	0.988	0.988	0.988	0.988	0.988	0.989	0.989	0.988	0.989	0.989	0.988	0.989	0.988	0.988	0.989	0.989	0.989	0.989	0.989
18520-1	0.923	0.922	0.928	0.928	0.928	0.959	0.958	0.999	ID	0.989	0.989	0.989	0.989	0.989	0.989	0.989	0.989	0.99	0.988	0.989	0.989	0.989	0.989	0.989	0.989	0.989	0.989	0.989	0.989	0.989	0.989	0.988	0.988	0.989	0.989	0.989	0.99	0.989	0.989	0.989	0.989	0.989	0.989	0.989	0.99	0.99	0.99	0.99	0.99
25338-1	0.923	0.923	0.928	0.928	0.928	0.957	0.956	0.989	0.989	ID	1	1	1	1	0.995	0.995	0.996	0.996	0.995	0.995	0.995	0.995	0.995	0.996	0.996	0.996	0.996	0.995	0.994	0.994	0.994	0.993	0.993	0.993	0.994	0.995	0.996	0.994	0.995	0.995	0.993	0.995	0.993	0.993	0.996	0.996	0.996	0.996	0.996
25338-2	0.923	0.923	0.928	0.928	0.928	0.957	0.956	0.989	0.989	1	ID	1	1	1	0.995	0.995	0.996	0.996	0.995	0.995	0.995	0.995	0.995	0.996	0.996	0.996	0.996	0.995	0.994	0.994	0.994	0.993	0.993	0.993	0.994	0.995	0.996	0.994	0.995	0.995	0.993	0.995	0.993	0.993	0.996	0.996	0.996	0.996	0.996
23609	0.923	0.923	0.928	0.928	0.928	0.957	0.956	0.989	0.989	1	1	ID	1	1	0.995	0.995	0.996	0.996	0.995	0.995	0.995	0.995	0.995	0.996	0.996	0.996	0.996	0.995	0.994	0.994	0.994	0.993	0.993	0.993	0.994	0.995	0.996	0.994	0.995	0.995	0.993	0.995	0.993	0.993	0.996	0.996	0.996	0.996	0.996
23608	0.923	0.923	0.928	0.928	0.928	0.957	0.956	0.989	0.989	1	1	1	ID	1	0.995	0.995	0.996	0.996	0.995	0.995	0.995	0.995	0.995	0.996	0.996	0.996	0.996	0.995	0.994	0.994	0.994	0.993	0.993	0.993	0.994	0.995	0.996	0.994	0.995	0.995	0.993	0.995	0.993	0.993	0.996	0.996	0.996	0.996	0.996
23608-1K	0.923	0.923	0.928	0.928	0.928	0.957	0.956	0.989	0.989	1	1	1	1	ID	0.995	0.995	0.996	0.996	0.995	0.995	0.995	0.995	0.995	0.996	0.996	0.996	0.996	0.995	0.994	0.994	0.994	0.993	0.993	0.993	0.994	0.995	0.996	0.994	0.995	0.995	0.993	0.995	0.993	0.993	0.996	0.996	0.996	0.996	0.996
3306-2	0.924	0.923	0.929	0.928	0.928	0.956	0.955	0.988	0.989	0.995	0.995	0.995	0.995	0.995	ID	1	0.995	0.996	0.996	0.997	0.997	0.997	0.997	0.998	0.998	0.998	0.998	0.997	0.996	0.996	0.996	0.992	0.992	0.992	0.993	0.993	0.994	0.993	0.993	0.993	0.992	0.993	0.992	0.992	0.994	0.994	0.994	0.994	0.994
3306-1	0.924	0.923	0.929	0.928	0.928	0.956	0.955	0.988	0.989	0.995	0.995	0.995	0.995	0.995	1	ID	0.995	0.996	0.996	0.997	0.997	0.997	0.997	0.998	0.998	0.998	0.998	0.997	0.996	0.996	0.996	0.992	0.992	0.992	0.993	0.993	0.994	0.993	0.993	0.993	0.992	0.993	0.992	0.992	0.994	0.994	0.994	0.994	0.994
63	0.923	0.923	0.928	0.928	0.928	0.956	0.956	0.989	0.989	0.996	0.996	0.996	0.996	0.996	0.995	0.995	ID	0.996	0.994	0.995	0.995	0.995	0.995	0.996	0.996	0.996	0.996	0.995	0.994	0.994	0.994	0.992	0.992	0.992	0.993	0.993	0.994	0.993	0.994	0.994	0.992	0.993	0.992	0.992	0.994	0.994	0.994	0.994	0.994
21312	0.923	0.923	0.928	0.928	0.928	0.957	0.956	0.989	0.99	0.996	0.996	0.996	0.996	0.996	0.996	0.996	0.996	ID	0.996	0.996	0.996	0.996	0.996	0.997	0.997	0.997	0.997	0.996	0.996	0.996	0.996	0.993	0.993	0.993	0.994	0.994	0.995	0.994	0.995	0.995	0.993	0.994	0.993	0.993	0.995	0.995	0.995	0.995	0.995
23404	0.924	0.924	0.929	0.929	0.929	0.956	0.955	0.988	0.988	0.995	0.995	0.995	0.995	0.995	0.996	0.996	0.994	0.996	ID	0.999	0.999	0.999	0.999	0.997	0.997	0.997	0.997	0.996	0.996	0.996	0.996	0.991	0.991	0.992	0.992	0.993	0.993	0.992	0.993	0.993	0.992	0.993	0.992	0.992	0.993	0.993	0.993	0.993	0.993
23404-2T	0.924	0.923	0.929	0.928	0.928	0.956	0.955	0.988	0.989	0.995	0.995	0.995	0.995	0.995	0.997	0.997	0.995	0.996	0.999	ID	1	1	1	0.998	0.998	0.998	0.998	0.997	0.996	0.996	0.996	0.991	0.991	0.992	0.993	0.993	0.994	0.993	0.993	0.993	0.992	0.993	0.992	0.992	0.994	0.994	0.994	0.994	0.994
23404-4K	0.924	0.923	0.929	0.928	0.928	0.956	0.955	0.988	0.989	0.995	0.995	0.995	0.995	0.995	0.997	0.997	0.995	0.996	0.999	1	ID	1	1	0.998	0.998	0.998	0.998	0.997	0.996	0.996	0.996	0.991	0.991	0.992	0.993	0.993	0.994	0.993	0.993	0.993	0.992	0.993	0.992	0.992	0.994	0.994	0.994	0.994	0.994
23404-2K	0.924	0.923	0.929	0.928	0.928	0.956	0.955	0.988	0.989	0.995	0.995	0.995	0.995	0.995	0.997	0.997	0.995	0.996	0.999	1	1	ID	1	0.998	0.998	0.998	0.998	0.997	0.996	0.996	0.996	0.991	0.991	0.992	0.993	0.993	0.994	0.993	0.993	0.993	0.992	0.993	0.992	0.992	0.994	0.994	0.994	0.994	0.994
23404-4T	0.924	0.923	0.929	0.928	0.928	0.956	0.955	0.988	0.989	0.995	0.995	0.995	0.995	0.995	0.997	0.997	0.995	0.996	0.999	1	1	1	ID	0.998	0.998	0.998	0.998	0.997	0.996	0.996	0.996	0.991	0.991	0.992	0.993	0.993	0.994	0.993	0.993	0.993	0.992	0.993	0.992	0.992	0.994	0.994	0.994	0.994	0.994
22477-2	0.923	0.923	0.928	0.927	0.927	0.956	0.956	0.989	0.989	0.996	0.996	0.996	0.996	0.996	0.998	0.998	0.996	0.997	0.997	0.998	0.998	0.998	0.998	ID	1	1	1	0.999	0.998	0.998	0.998	0.992	0.992	0.993	0.993	0.994	0.995	0.993	0.994	0.994	0.993	0.994	0.993	0.993	0.995	0.995	0.995	0.995	0.995
22684	0.923	0.923	0.928	0.927	0.927	0.956	0.956	0.989	0.989	0.996	0.996	0.996	0.996	0.996	0.998	0.998	0.996	0.997	0.997	0.998	0.998	0.998	0.998	1	ID	1	1	0.999	0.998	0.998	0.998	0.992	0.992	0.993	0.993	0.994	0.995	0.993	0.994	0.994	0.993	0.994	0.993	0.993	0.995	0.995	0.995	0.995	0.995
22477-1	0.923	0.923	0.928	0.927	0.927	0.956	0.956	0.989	0.989	0.996	0.996	0.996	0.996	0.996	0.998	0.998	0.996	0.997	0.997	0.998	0.998	0.998	0.998	1	1	ID	1	0.999	0.998	0.998	0.998	0.992	0.992	0.993	0.993	0.994	0.995	0.993	0.994	0.994	0.993	0.994	0.993	0.993	0.995	0.995	0.995	0.995	0.995
25702-2	0.923	0.923	0.928	0.927	0.927	0.956	0.956	0.989	0.989	0.996	0.996	0.996	0.996	0.996	0.998	0.998	0.996	0.997	0.997	0.998	0.998	0.998	0.998	1	1	1	ID	0.999	0.998	0.998	0.998	0.992	0.992	0.993	0.993	0.994	0.995	0.993	0.994	0.994	0.993	0.994	0.993	0.993	0.995	0.995	0.995	0.995	0.995
2755	0.923	0.923	0.928	0.927	0.927	0.956	0.956	0.988	0.989	0.995	0.995	0.995	0.995	0.995	0.997	0.997	0.995	0.996	0.996	0.997	0.997	0.997	0.997	0.999	0.999	0.999	0.999	ID	0.997	0.997	0.997	0.991	0.991	0.992	0.993	0.993	0.994	0.993	0.993	0.993	0.992	0.993	0.992	0.992	0.994	0.994	0.994	0.994	0.994
25827-2	0.923	0.922	0.927	0.927	0.927	0.955	0.954	0.988	0.989	0.994	0.994	0.994	0.994	0.994	0.996	0.996	0.994	0.996	0.996	0.996	0.996	0.996	0.996	0.998	0.998	0.998	0.998	0.997	ID	1	1	0.99	0.99	0.992	0.992	0.992	0.993	0.992	0.993	0.993	0.992	0.992	0.992	0.992	0.993	0.993	0.993	0.993	0.993
25827-1	0.923	0.922	0.927	0.927	0.927	0.955	0.954	0.988	0.989	0.994	0.994	0.994	0.994	0.994	0.996	0.996	0.994	0.996	0.996	0.996	0.996	0.996	0.996	0.998	0.998	0.998	0.998	0.997	1	ID	1	0.99	0.99	0.992	0.992	0.992	0.993	0.992	0.993	0.993	0.992	0.992	0.992	0.992	0.993	0.993	0.993	0.993	0.993
25827-3	0.923	0.922	0.927	0.927	0.927	0.955	0.954	0.988	0.989	0.994	0.994	0.994	0.994	0.994	0.996	0.996	0.994	0.996	0.996	0.996	0.996	0.996	0.996	0.998	0.998	0.998	0.998	0.997	1	1	ID	0.99	0.99	0.992	0.992	0.992	0.993	0.992	0.993	0.993	0.992	0.992	0.992	0.992	0.993	0.993	0.993	0.993	0.993
61-1	0.921	0.921	0.925	0.925	0.925	0.956	0.954	0.988	0.988	0.993	0.993	0.993	0.993	0.993	0.992	0.992	0.992	0.993	0.991	0.991	0.991	0.991	0.991	0.992	0.992	0.992	0.992	0.991	0.99	0.99	0.99	ID	1	0.994	0.995	0.995	0.996	0.995	0.996	0.996	0.994	0.995	0.994	0.994	0.996	0.996	0.996	0.996	0.996
61-2	0.921	0.921	0.925	0.925	0.925	0.956	0.954	0.988	0.988	0.993	0.993	0.993	0.993	0.993	0.992	0.992	0.992	0.993	0.991	0.991	0.991	0.991	0.991	0.992	0.992	0.992	0.992	0.991	0.99	0.99	0.99	1	ID	0.994	0.995	0.995	0.996	0.995	0.996	0.996	0.994	0.995	0.994	0.994	0.996	0.996	0.996	0.996	0.996
785	0.922	0.922	0.926	0.926	0.926	0.956	0.956	0.988	0.989	0.993	0.993	0.993	0.993	0.993	0.992	0.992	0.992	0.993	0.992	0.992	0.992	0.992	0.992	0.993	0.993	0.993	0.993	0.992	0.992	0.992	0.992	0.994	0.994	ID	0.996	0.996	0.997	0.996	0.997	0.997	1	0.996	1	1	0.997	0.997	0.997	0.997	0.997
22608-1	0.922	0.922	0.926	0.926	0.926	0.956	0.956	0.988	0.989	0.994	0.994	0.994	0.994	0.994	0.993	0.993	0.993	0.994	0.992	0.993	0.993	0.993	0.993	0.993	0.993	0.993	0.993	0.993	0.992	0.992	0.992	0.995	0.995	0.996	ID	0.999	0.998	0.997	0.998	0.998	0.996	0.996	0.996	0.996	0.998	0.998	0.998	0.998	0.998
22608-2	0.923	0.922	0.926	0.926	0.926	0.957	0.956	0.989	0.989	0.995	0.995	0.995	0.995	0.995	0.993	0.993	0.993	0.994	0.993	0.993	0.993	0.993	0.993	0.994	0.994	0.994	0.994	0.993	0.992	0.992	0.992	0.995	0.995	0.996	0.999	ID	0.999	0.997	0.998	0.998	0.996	0.997	0.996	0.996	0.999	0.999	0.999	0.999	0.999
22224-3T	0.923	0.923	0.927	0.927	0.927	0.958	0.957	0.989	0.99	0.996	0.996	0.996	0.996	0.996	0.994	0.994	0.994	0.995	0.993	0.994	0.994	0.994	0.994	0.995	0.995	0.995	0.995	0.994	0.993	0.993	0.993	0.996	0.996	0.997	0.998	0.999	ID	0.998	0.999	0.999	0.997	0.998	0.997	0.997	1	1	1	1	1
22608-3T	0.923	0.923	0.926	0.926	0.926	0.956	0.956	0.988	0.989	0.994	0.994	0.994	0.994	0.994	0.993	0.993	0.993	0.994	0.992	0.993	0.993	0.993	0.993	0.993	0.993	0.993	0.993	0.993	0.992	0.992	0.992	0.995	0.995	0.996	0.997	0.997	0.998	ID	0.998	0.998	0.996	0.996	0.996	0.996	0.998	0.998	0.998	0.998	0.998
22750	0.923	0.923	0.927	0.926	0.926	0.957	0.956	0.989	0.989	0.995	0.995	0.995	0.995	0.995	0.993	0.993	0.994	0.995	0.993	0.993	0.993	0.993	0.993	0.994	0.994	0.994	0.994	0.993	0.993	0.993	0.993	0.996	0.996	0.997	0.998	0.998	0.999	0.998	ID	0.999	0.997	0.997	0.997	0.997	0.999	0.999	0.999	0.999	0.999
22224-2T	0.923	0.923	0.927	0.927	0.927	0.957	0.956	0.989	0.989	0.995	0.995	0.995	0.995	0.995	0.993	0.993	0.994	0.995	0.993	0.993	0.993	0.993	0.993	0.994	0.994	0.994	0.994	0.993	0.993	0.993	0.993	0.996	0.996	0.997	0.998	0.998	0.999	0.998	0.999	ID	0.997	0.997	0.997	0.997	0.999	0.999	0.999	0.999	0.999
913	0.922	0.922	0.926	0.926	0.926	0.956	0.956	0.988	0.989	0.993	0.993	0.993	0.993	0.993	0.992	0.992	0.992	0.993	0.992	0.992	0.992	0.992	0.992	0.993	0.993	0.993	0.993	0.992	0.992	0.992	0.992	0.994	0.994	1	0.996	0.996	0.997	0.996	0.997	0.997	ID	0.996	1	1	0.997	0.997	0.997	0.997	0.997
785	0.923	0.923	0.927	0.927	0.927	0.956	0.955	0.989	0.989	0.995	0.995	0.995	0.995	0.995	0.993	0.993	0.993	0.994	0.993	0.993	0.993	0.993	0.993	0.994	0.994	0.994	0.994	0.993	0.992	0.992	0.992	0.995	0.995	0.996	0.996	0.997	0.998	0.996	0.997	0.997	0.996	ID	0.996	0.996	0.998	0.998	0.998	0.998	0.998
913	0.922	0.922	0.926	0.926	0.926	0.956	0.956	0.988	0.989	0.993	0.993	0.993	0.993	0.993	0.992	0.992	0.992	0.993	0.992	0.992	0.992	0.992	0.992	0.993	0.993	0.993	0.993	0.992	0.992	0.992	0.992	0.994	0.994	1	0.996	0.996	0.997	0.996	0.997	0.997	1	0.996	ID	1	0.997	0.997	0.997	0.997	0.997
913	0.922	0.922	0.926	0.926	0.926	0.956	0.956	0.988	0.989	0.993	0.993	0.993	0.993	0.993	0.992	0.992	0.992	0.993	0.992	0.992	0.992	0.992	0.992	0.993	0.993	0.993	0.993	0.992	0.992	0.992	0.992	0.994	0.994	1	0.996	0.996	0.997	0.996	0.997	0.997	1	0.996	1	ID	0.997	0.997	0.997	0.997	0.997
23589-1T	0.923	0.923	0.927	0.927	0.927	0.958	0.957	0.989	0.99	0.996	0.996	0.996	0.996	0.996	0.994	0.994	0.994	0.995	0.993	0.994	0.994	0.994	0.994	0.995	0.995	0.995	0.995	0.994	0.993	0.993	0.993	0.996	0.996	0.997	0.998	0.999	1	0.998	0.999	0.999	0.997	0.998	0.997	0.997	ID	1	1	1	1
22608-2T	0.923	0.923	0.927	0.927	0.927	0.958	0.957	0.989	0.99	0.996	0.996	0.996	0.996	0.996	0.994	0.994	0.994	0.995	0.993	0.994	0.994	0.994	0.994	0.995	0.995	0.995	0.995	0.994	0.993	0.993	0.993	0.996	0.996	0.997	0.998	0.999	1	0.998	0.999	0.999	0.997	0.998	0.997	0.997	1	ID	1	1	1
23589-3	0.923	0.923	0.927	0.927	0.927	0.958	0.957	0.989	0.99	0.996	0.996	0.996	0.996	0.996	0.994	0.994	0.994	0.995	0.993	0.994	0.994	0.994	0.994	0.995	0.995	0.995	0.995	0.994	0.993	0.993	0.993	0.996	0.996	0.997	0.998	0.999	1	0.998	0.999	0.999	0.997	0.998	0.997	0.997	1	1	ID	1	1
23589-1T	0.923	0.923	0.927	0.927	0.927	0.958	0.957	0.989	0.99	0.996	0.996	0.996	0.996	0.996	0.994	0.994	0.994	0.995	0.993	0.994	0.994	0.994	0.994	0.995	0.995	0.995	0.995	0.994	0.993	0.993	0.993	0.996	0.996	0.997	0.998	0.999	1	0.998	0.999	0.999	0.997	0.998	0.997	0.997	1	1	1	ID	1
23589-4	0.923	0.923	0.927	0.927	0.927	0.958	0.957	0.989	0.99	0.996	0.996	0.996	0.996	0.996	0.994	0.994	0.994	0.995	0.993	0.994	0.994	0.994	0.994	0.995	0.995	0.995	0.995	0.994	0.993	0.993	0.993	0.996	0.996	0.997	0.998	0.999	1	0.998	0.999	0.999	0.997	0.998	0.997	0.997	1	1	1	1	ID
22224-3K	0.923	0.923	0.927	0.927	0.927	0.958	0.957	0.989	0.99	0.996	0.996	0.996	0.996	0.996	0.994	0.994	0.994	0.995	0.993	0.994	0.994	0.994	0.994	0.995	0.995	0.995	0.995	0.994	0.993	0.993	0.993	0.996	0.996	0.997	0.998	0.999	1	0.998	0.999	0.999	0.997	0.998	0.997	0.997	1	1	1	1	1
22224-4T	0.923	0.923	0.927	0.927	0.927	0.958	0.957	0.989	0.99	0.996	0.996	0.996	0.996	0.996	0.994	0.994	0.994	0.995	0.993	0.994	0.994	0.994	0.994	0.995	0.995	0.995	0.995	0.994	0.993	0.993	0.993	0.996	0.996	0.997	0.998	0.999	1	0.998	0.999	0.999	0.997	0.998	0.997	0.997	1	1	1	1	1
22608-1T	0.923	0.923	0.927	0.926	0.926	0.957	0.956	0.989	0.989	0.995	0.995	0.995	0.995	0.995	0.993	0.993	0.994	0.995	0.993	0.993	0.993	0.993	0.993	0.994	0.994	0.994	0.994	0.993	0.993	0.993	0.993	0.996	0.996	0.997	0.998	0.998	0.999	0.998	0.999	0.999	0.997	0.997	0.997	0.997	0.999	0.999	0.999	0.999	0.999
23458-1K	0.923	0.922	0.927	0.926	0.926	0.957	0.956	0.989	0.989	0.995	0.995	0.995	0.995	0.995	0.993	0.993	0.993	0.994	0.993	0.993	0.993	0.993	0.993	0.994	0.994	0.994	0.994	0.993	0.992	0.992	0.992	0.995	0.995	0.996	0.997	0.998	0.999	0.997	0.998	0.998	0.996	0.997	0.996	0.996	0.999	0.999	0.999	0.999	0.999
23458-2T	0.922	0.922	0.926	0.926	0.926	0.957	0.956	0.988	0.989	0.994	0.994	0.994	0.994	0.994	0.993	0.993	0.993	0.994	0.992	0.993	0.993	0.993	0.993	0.993	0.993	0.993	0.993	0.993	0.992	0.992	0.992	0.995	0.995	0.996	0.997	0.997	0.998	0.997	0.998	0.998	0.996	0.996	0.996	0.996	0.998	0.998	0.998	0.998	0.998
23458-4T	0.923	0.922	0.927	0.926	0.926	0.957	0.956	0.989	0.989	0.995	0.995	0.995	0.995	0.995	0.993	0.993	0.993	0.994	0.993	0.993	0.993	0.993	0.993	0.994	0.994	0.994	0.994	0.993	0.992	0.992	0.992	0.995	0.995	0.996	0.997	0.998	0.999	0.997	0.998	0.998	0.996	0.997	0.996	0.996	0.999	0.999	0.999	0.999	0.999
23458-5T	0.923	0.922	0.927	0.926	0.926	0.957	0.956	0.989	0.989	0.995	0.995	0.995	0.995	0.995	0.993	0.993	0.993	0.994	0.993	0.993	0.993	0.993	0.993	0.994	0.994	0.994	0.994	0.993	0.992	0.992	0.992	0.995	0.995	0.996	0.997	0.998	0.999	0.997	0.998	0.998	0.996	0.997	0.996	0.996	0.999	0.999	0.999	0.999	0.999
25322-179	0.923	0.922	0.927	0.926	0.926	0.957	0.956	0.989	0.989	0.995	0.995	0.995	0.995	0.995	0.993	0.993	0.993	0.994	0.993	0.993	0.993	0.993	0.993	0.994	0.994	0.994	0.994	0.993	0.992	0.992	0.992	0.995	0.995	0.996	0.997	0.998	0.999	0.997	0.998	0.998	0.996	0.997	0.996	0.996	0.999	0.999	0.999	0.999	0.999
25322-205	0.922	0.922	0.926	0.926	0.926	0.957	0.956	0.988	0.989	0.994	0.994	0.994	0.994	0.994	0.993	0.993	0.993	0.994	0.992	0.993	0.993	0.993	0.993	0.993	0.993	0.993	0.993	0.993	0.992	0.992	0.992	0.995	0.995	0.996	0.997	0.997	0.998	0.997	0.998	0.998	0.996	0.996	0.996	0.996	0.998	0.998	0.998	0.998	0.998
25322-229	0.922	0.922	0.926	0.926	0.926	0.957	0.956	0.988	0.989	0.994	0.994	0.994	0.994	0.994	0.993	0.993	0.993	0.994	0.992	0.993	0.993	0.993	0.993	0.993	0.993	0.993	0.993	0.993	0.992	0.992	0.992	0.995	0.995	0.996	0.997	0.997	0.998	0.997	0.998	0.998	0.996	0.996	0.996	0.996	0.998	0.998	0.998	0.998	0.998
Sequence Difference Count Matrix
PB1-nt	20689-27T	20689-28T	2968	8028-1	8028-2	22380	25690	18520-2	18520-1	25338-1	25338-2	23609	23608	23608-1K	3306-2	3306-1	63	21312	23404	23404-2T	23404-4K	23404-2K	23404-4T	22477-2	22684	22477-1	25702-2	2755	25827-2	25827-1	25827-3	61-1	61-2	785	22608-1	22608-2	22224-3T	22608-3T	22750	22224-2T	913	785	913	913	23589-1T	22608-2T	23589-3	23589-1T	23589-4
20689-27T	ID	3	49	49	49	169	171	178	177	175	175	175	175	175	174	174	175	175	173	174	174	174	174	176	176	176	176	176	177	177	177	180	180	178	178	177	175	176	176	175	178	175	178	178	175	175	175	175	175
20689-28T	3	ID	48	48	48	171	173	179	178	176	176	176	176	176	175	175	176	176	174	175	175	175	175	177	177	177	177	177	178	178	178	181	181	179	179	178	176	177	177	176	179	176	179	179	176	176	176	176	176
2968	49	48	ID	4	4	166	168	165	164	164	164	164	164	164	163	163	164	164	162	163	163	163	163	165	165	165	165	165	166	166	166	171	171	169	169	168	166	169	167	166	169	166	169	169	166	166	166	166	166
8028-1	49	48	4	ID	0	167	169	166	165	165	165	165	165	165	164	164	165	165	163	164	164	164	164	166	166	166	166	166	167	167	167	172	172	170	170	169	167	170	168	167	170	167	170	170	167	167	167	167	167
8028-2	49	48	4	0	ID	167	169	166	165	165	165	165	165	165	164	164	165	165	163	164	164	164	164	166	166	166	166	166	167	167	167	172	172	170	170	169	167	170	168	167	170	167	170	170	167	167	167	167	167
22380	169	171	166	167	167	ID	4	93	92	98	98	98	98	98	101	101	99	98	101	100	100	100	100	99	99	99	99	99	103	103	103	101	101	99	99	98	96	99	97	97	99	100	99	99	96	96	96	96	96
25690	171	173	168	169	169	4	ID	97	96	100	100	100	100	100	103	103	101	100	103	102	102	102	102	101	101	101	101	101	105	105	105	105	105	101	101	100	98	101	99	99	101	102	101	101	98	98	98	98	98
18520-2	178	179	165	166	166	93	97	ID	1	24	24	24	24	24	26	26	25	23	27	26	26	26	26	24	24	24	24	26	26	26	26	27	27	26	26	25	23	26	24	24	26	25	26	26	23	23	23	23	23
18520-1	177	178	164	165	165	92	96	1	ID	23	23	23	23	23	25	25	24	22	26	25	25	25	25	23	23	23	23	25	25	25	25	26	26	25	25	24	22	25	23	23	25	24	25	25	22	22	22	22	22
25338-1	175	176	164	165	165	98	100	24	23	ID	0	0	0	0	10	10	7	7	11	10	10	10	10	8	8	8	8	10	12	12	12	15	15	14	12	11	9	12	10	10	14	11	14	14	9	9	9	9	9
25338-2	175	176	164	165	165	98	100	24	23	0	ID	0	0	0	10	10	7	7	11	10	10	10	10	8	8	8	8	10	12	12	12	15	15	14	12	11	9	12	10	10	14	11	14	14	9	9	9	9	9
23609	175	176	164	165	165	98	100	24	23	0	0	ID	0	0	10	10	7	7	11	10	10	10	10	8	8	8	8	10	12	12	12	15	15	14	12	11	9	12	10	10	14	11	14	14	9	9	9	9	9
23608	175	176	164	165	165	98	100	24	23	0	0	0	ID	0	10	10	7	7	11	10	10	10	10	8	8	8	8	10	12	12	12	15	15	14	12	11	9	12	10	10	14	11	14	14	9	9	9	9	9
23608-1K	175	176	164	165	165	98	100	24	23	0	0	0	0	ID	10	10	7	7	11	10	10	10	10	8	8	8	8	10	12	12	12	15	15	14	12	11	9	12	10	10	14	11	14	14	9	9	9	9	9
3306-2	174	175	163	164	164	101	103	26	25	10	10	10	10	10	ID	0	11	7	7	6	6	6	6	4	4	4	4	6	8	8	8	17	17	18	16	15	13	16	14	14	18	15	18	18	13	13	13	13	13
3306-1	174	175	163	164	164	101	103	26	25	10	10	10	10	10	0	ID	11	7	7	6	6	6	6	4	4	4	4	6	8	8	8	17	17	18	16	15	13	16	14	14	18	15	18	18	13	13	13	13	13
63	175	176	164	165	165	99	101	25	24	7	7	7	7	7	11	11	ID	8	12	11	11	11	11	9	9	9	9	11	13	13	13	18	18	17	15	14	12	15	13	13	17	14	17	17	12	12	12	12	12
21312	175	176	164	165	165	98	100	23	22	7	7	7	7	7	7	7	8	ID	8	7	7	7	7	5	5	5	5	7	9	9	9	16	16	15	13	12	10	13	11	11	15	12	15	15	10	10	10	10	10
23404	173	174	162	163	163	101	103	27	26	11	11	11	11	11	7	7	12	8	ID	1	1	1	1	5	5	5	5	7	9	9	9	20	20	17	17	16	14	17	15	14	17	16	17	17	14	14	14	14	14
23404-2T	174	175	163	164	164	100	102	26	25	10	10	10	10	10	6	6	11	7	1	ID	0	0	0	4	4	4	4	6	8	8	8	19	19	18	16	15	13	16	14	14	18	15	18	18	13	13	13	13	13
23404-4K	174	175	163	164	164	100	102	26	25	10	10	10	10	10	6	6	11	7	1	0	ID	0	0	4	4	4	4	6	8	8	8	19	19	18	16	15	13	16	14	14	18	15	18	18	13	13	13	13	13
23404-2K	174	175	163	164	164	100	102	26	25	10	10	10	10	10	6	6	11	7	1	0	0	ID	0	4	4	4	4	6	8	8	8	19	19	18	16	15	13	16	14	14	18	15	18	18	13	13	13	13	13
23404-4T	174	175	163	164	164	100	102	26	25	10	10	10	10	10	6	6	11	7	1	0	0	0	ID	4	4	4	4	6	8	8	8	19	19	18	16	15	13	16	14	14	18	15	18	18	13	13	13	13	13
22477-2	176	177	165	166	166	99	101	24	23	8	8	8	8	8	4	4	9	5	5	4	4	4	4	ID	0	0	0	2	4	4	4	17	17	16	14	13	11	14	12	12	16	13	16	16	11	11	11	11	11
22684	176	177	165	166	166	99	101	24	23	8	8	8	8	8	4	4	9	5	5	4	4	4	4	0	ID	0	0	2	4	4	4	17	17	16	14	13	11	14	12	12	16	13	16	16	11	11	11	11	11
22477-1	176	177	165	166	166	99	101	24	23	8	8	8	8	8	4	4	9	5	5	4	4	4	4	0	0	ID	0	2	4	4	4	17	17	16	14	13	11	14	12	12	16	13	16	16	11	11	11	11	11
25702-2	176	177	165	166	166	99	101	24	23	8	8	8	8	8	4	4	9	5	5	4	4	4	4	0	0	0	ID	2	4	4	4	17	17	16	14	13	11	14	12	12	16	13	16	16	11	11	11	11	11
2755	176	177	165	166	166	99	101	26	25	10	10	10	10	10	6	6	11	7	7	6	6	6	6	2	2	2	2	ID	6	6	6	19	19	18	16	15	13	16	14	14	18	15	18	18	13	13	13	13	13
25827-2	177	178	166	167	167	103	105	26	25	12	12	12	12	12	8	8	13	9	9	8	8	8	8	4	4	4	4	6	ID	0	0	21	21	18	18	17	15	18	16	16	18	17	18	18	15	15	15	15	15
25827-1	177	178	166	167	167	103	105	26	25	12	12	12	12	12	8	8	13	9	9	8	8	8	8	4	4	4	4	6	0	ID	0	21	21	18	18	17	15	18	16	16	18	17	18	18	15	15	15	15	15
25827-3	177	178	166	167	167	103	105	26	25	12	12	12	12	12	8	8	13	9	9	8	8	8	8	4	4	4	4	6	0	0	ID	21	21	18	18	17	15	18	16	16	18	17	18	18	15	15	15	15	15
61-1	180	181	171	172	172	101	105	27	26	15	15	15	15	15	17	17	18	16	20	19	19	19	19	17	17	17	17	19	21	21	21	ID	0	13	11	10	8	11	9	9	13	10	13	13	8	8	8	8	8
61-2	180	181	171	172	172	101	105	27	26	15	15	15	15	15	17	17	18	16	20	19	19	19	19	17	17	17	17	19	21	21	21	0	ID	13	11	10	8	11	9	9	13	10	13	13	8	8	8	8	8
785	178	179	169	170	170	99	101	26	25	14	14	14	14	14	18	18	17	15	17	18	18	18	18	16	16	16	16	18	18	18	18	13	13	ID	8	7	5	8	6	5	0	9	0	0	5	5	5	5	5
22608-1	178	179	169	170	170	99	101	26	25	12	12	12	12	12	16	16	15	13	17	16	16	16	16	14	14	14	14	16	18	18	18	11	11	8	ID	1	3	6	4	4	8	7	8	8	3	3	3	3	3
22608-2	177	178	168	169	169	98	100	25	24	11	11	11	11	11	15	15	14	12	16	15	15	15	15	13	13	13	13	15	17	17	17	10	10	7	1	ID	2	5	3	3	7	6	7	7	2	2	2	2	2
22224-3T	175	176	166	167	167	96	98	23	22	9	9	9	9	9	13	13	12	10	14	13	13	13	13	11	11	11	11	13	15	15	15	8	8	5	3	2	ID	3	1	1	5	4	5	5	0	0	0	0	0
22608-3T	176	177	169	170	170	99	101	26	25	12	12	12	12	12	16	16	15	13	17	16	16	16	16	14	14	14	14	16	18	18	18	11	11	8	6	5	3	ID	4	4	8	7	8	8	3	3	3	3	3
22750	176	177	167	168	168	97	99	24	23	10	10	10	10	10	14	14	13	11	15	14	14	14	14	12	12	12	12	14	16	16	16	9	9	6	4	3	1	4	ID	2	6	5	6	6	1	1	1	1	1
22224-2T	175	176	166	167	167	97	99	24	23	10	10	10	10	10	14	14	13	11	14	14	14	14	14	12	12	12	12	14	16	16	16	9	9	5	4	3	1	4	2	ID	5	5	5	5	1	1	1	1	1
913	178	179	169	170	170	99	101	26	25	14	14	14	14	14	18	18	17	15	17	18	18	18	18	16	16	16	16	18	18	18	18	13	13	0	8	7	5	8	6	5	ID	9	0	0	5	5	5	5	5
785	175	176	166	167	167	100	102	25	24	11	11	11	11	11	15	15	14	12	16	15	15	15	15	13	13	13	13	15	17	17	17	10	10	9	7	6	4	7	5	5	9	ID	9	9	4	4	4	4	4
913	178	179	169	170	170	99	101	26	25	14	14	14	14	14	18	18	17	15	17	18	18	18	18	16	16	16	16	18	18	18	18	13	13	0	8	7	5	8	6	5	0	9	ID	0	5	5	5	5	5
913	178	179	169	170	170	99	101	26	25	14	14	14	14	14	18	18	17	15	17	18	18	18	18	16	16	16	16	18	18	18	18	13	13	0	8	7	5	8	6	5	0	9	0	ID	5	5	5	5	5
23589-1T	175	176	166	167	167	96	98	23	22	9	9	9	9	9	13	13	12	10	14	13	13	13	13	11	11	11	11	13	15	15	15	8	8	5	3	2	0	3	1	1	5	4	5	5	ID	0	0	0	0
22608-2T	175	176	166	167	167	96	98	23	22	9	9	9	9	9	13	13	12	10	14	13	13	13	13	11	11	11	11	13	15	15	15	8	8	5	3	2	0	3	1	1	5	4	5	5	0	ID	0	0	0
23589-3	175	176	166	167	167	96	98	23	22	9	9	9	9	9	13	13	12	10	14	13	13	13	13	11	11	11	11	13	15	15	15	8	8	5	3	2	0	3	1	1	5	4	5	5	0	0	ID	0	0
23589-1T	175	176	166	167	167	96	98	23	22	9	9	9	9	9	13	13	12	10	14	13	13	13	13	11	11	11	11	13	15	15	15	8	8	5	3	2	0	3	1	1	5	4	5	5	0	0	0	ID	0
23589-4	175	176	166	167	167	96	98	23	22	9	9	9	9	9	13	13	12	10	14	13	13	13	13	11	11	11	11	13	15	15	15	8	8	5	3	2	0	3	1	1	5	4	5	5	0	0	0	0	ID
22224-3K	175	176	166	167	167	96	98	23	22	9	9	9	9	9	13	13	12	10	14	13	13	13	13	11	11	11	11	13	15	15	15	8	8	5	3	2	0	3	1	1	5	4	5	5	0	0	0	0	0
22224-4T	175	176	166	167	167	96	98	23	22	9	9	9	9	9	13	13	12	10	14	13	13	13	13	11	11	11	11	13	15	15	15	8	8	5	3	2	0	3	1	1	5	4	5	5	0	0	0	0	0
22608-1T	176	177	167	168	168	97	99	24	23	10	10	10	10	10	14	14	13	11	15	14	14	14	14	12	12	12	12	14	16	16	16	9	9	6	3	3	1	4	2	2	6	5	6	6	1	1	1	1	1
23458-1K	177	178	167	168	168	97	99	25	24	11	11	11	11	11	15	15	14	12	16	15	15	15	15	13	13	13	13	15	17	17	17	10	10	7	5	4	2	5	3	3	7	6	7	7	2	2	2	2	2
23458-2T	178	179	168	169	169	98	100	26	25	12	12	12	12	12	16	16	15	13	17	16	16	16	16	14	14	14	14	16	18	18	18	11	11	8	6	5	3	6	4	4	8	7	8	8	3	3	3	3	3
23458-4T	177	178	167	168	168	97	99	25	24	11	11	11	11	11	15	15	14	12	16	15	15	15	15	13	13	13	13	15	17	17	17	10	10	7	5	4	2	5	3	3	7	6	7	7	2	2	2	2	2
23458-5T	177	178	167	168	168	97	99	25	24	11	11	11	11	11	15	15	14	12	16	15	15	15	15	13	13	13	13	15	17	17	17	10	10	7	5	4	2	5	3	3	7	6	7	7	2	2	2	2	2
25322-179	177	178	167	168	168	97	99	25	24	11	11	11	11	11	15	15	14	12	16	15	15	15	15	13	13	13	13	15	17	17	17	10	10	7	5	4	2	5	3	3	7	6	7	7	2	2	2	2	2
25322-205	178	179	168	169	169	98	100	26	25	12	12	12	12	12	16	16	15	13	17	16	16	16	16	14	14	14	14	16	18	18	18	11	11	8	6	5	3	6	4	4	8	7	8	8	3	3	3	3	3
25322-229	178	179	168	169	169	98	100	26	25	12	12	12	12	12	16	16	15	13	17	16	16	16	16	14	14	14	14	16	18	18	18	11	11	8	6	5	3	6	4	4	8	7	8	8	3	3	3	3	3
[truncated: 70 more columns]

## Sheet: PB1-f2
Sequence Identity Matrix
PB1-f2-nt	20689-27T	20689-28T	2968	8028-1	8028-2	22380	25690	18520-2	18520-1	25338-1	25338-2	23609	23608	23608-1K	3306-2	3306-1	63	21312	23404	23404-2T	23404-4K	23404-2K	23404-4T	22477-2	22684	22477-1	25702-2	2755	25827-2	25827-1	25827-3	61-1	61-2	785	22608-1	22608-2	22224-3T	22608-3T	22750	22224-2T	785	913	913	913	23589-1T	22608-2T	23589-3	23589-1T	23589-4
20689-27T	ID	0.996	0.974	0.974	0.974	0.934	0.934	0.919	0.919	0.93	0.93	0.93	0.93	0.93	0.93	0.93	0.926	0.93	0.93	0.93	0.93	0.93	0.93	0.93	0.93	0.93	0.93	0.934	0.93	0.93	0.93	0.93	0.93	0.93	0.93	0.93	0.93	0.934	0.93	0.93	0.926	0.926	0.926	0.926	0.93	0.93	0.93	0.93	0.93
20689-28T	0.996	ID	0.974	0.974	0.974	0.93	0.93	0.915	0.915	0.926	0.926	0.926	0.926	0.926	0.926	0.926	0.923	0.926	0.926	0.926	0.926	0.926	0.926	0.926	0.926	0.926	0.926	0.93	0.926	0.926	0.926	0.926	0.926	0.926	0.926	0.926	0.926	0.93	0.926	0.926	0.923	0.923	0.923	0.923	0.926	0.926	0.926	0.926	0.926
2968	0.974	0.974	ID	1	1	0.941	0.941	0.926	0.926	0.937	0.937	0.937	0.937	0.937	0.937	0.937	0.934	0.937	0.937	0.937	0.937	0.937	0.937	0.937	0.937	0.937	0.937	0.941	0.937	0.937	0.937	0.937	0.937	0.937	0.937	0.937	0.937	0.934	0.937	0.937	0.934	0.934	0.934	0.934	0.937	0.937	0.937	0.937	0.937
8028-1	0.974	0.974	1	ID	1	0.941	0.941	0.926	0.926	0.937	0.937	0.937	0.937	0.937	0.937	0.937	0.934	0.937	0.937	0.937	0.937	0.937	0.937	0.937	0.937	0.937	0.937	0.941	0.937	0.937	0.937	0.937	0.937	0.937	0.937	0.937	0.937	0.934	0.937	0.937	0.934	0.934	0.934	0.934	0.937	0.937	0.937	0.937	0.937
8028-2	0.974	0.974	1	1	ID	0.941	0.941	0.926	0.926	0.937	0.937	0.937	0.937	0.937	0.937	0.937	0.934	0.937	0.937	0.937	0.937	0.937	0.937	0.937	0.937	0.937	0.937	0.941	0.937	0.937	0.937	0.937	0.937	0.937	0.937	0.937	0.937	0.934	0.937	0.937	0.934	0.934	0.934	0.934	0.937	0.937	0.937	0.937	0.937
22380	0.934	0.93	0.941	0.941	0.941	ID	1	0.97	0.97	0.974	0.974	0.974	0.974	0.974	0.974	0.974	0.97	0.974	0.974	0.974	0.974	0.974	0.974	0.974	0.974	0.974	0.974	0.978	0.974	0.974	0.974	0.974	0.974	0.974	0.974	0.974	0.974	0.97	0.974	0.974	0.978	0.978	0.978	0.978	0.974	0.974	0.974	0.974	0.974
25690	0.934	0.93	0.941	0.941	0.941	1	ID	0.97	0.97	0.974	0.974	0.974	0.974	0.974	0.974	0.974	0.97	0.974	0.974	0.974	0.974	0.974	0.974	0.974	0.974	0.974	0.974	0.978	0.974	0.974	0.974	0.974	0.974	0.974	0.974	0.974	0.974	0.97	0.974	0.974	0.978	0.978	0.978	0.978	0.974	0.974	0.974	0.974	0.974
18520-2	0.919	0.915	0.926	0.926	0.926	0.97	0.97	ID	1	0.989	0.989	0.989	0.989	0.989	0.989	0.989	0.985	0.989	0.989	0.989	0.989	0.989	0.989	0.989	0.989	0.989	0.989	0.985	0.989	0.989	0.989	0.989	0.989	0.989	0.989	0.989	0.989	0.985	0.989	0.989	0.985	0.985	0.985	0.985	0.989	0.989	0.989	0.989	0.989
18520-1	0.919	0.915	0.926	0.926	0.926	0.97	0.97	1	ID	0.989	0.989	0.989	0.989	0.989	0.989	0.989	0.985	0.989	0.989	0.989	0.989	0.989	0.989	0.989	0.989	0.989	0.989	0.985	0.989	0.989	0.989	0.989	0.989	0.989	0.989	0.989	0.989	0.985	0.989	0.989	0.985	0.985	0.985	0.985	0.989	0.989	0.989	0.989	0.989
25338-1	0.93	0.926	0.937	0.937	0.937	0.974	0.974	0.989	0.989	ID	1	1	1	1	1	1	0.996	1	1	1	1	1	1	1	1	1	1	0.996	1	1	1	1	1	1	1	1	1	0.996	1	1	0.996	0.996	0.996	0.996	1	1	1	1	1
25338-2	0.93	0.926	0.937	0.937	0.937	0.974	0.974	0.989	0.989	1	ID	1	1	1	1	1	0.996	1	1	1	1	1	1	1	1	1	1	0.996	1	1	1	1	1	1	1	1	1	0.996	1	1	0.996	0.996	0.996	0.996	1	1	1	1	1
23609	0.93	0.926	0.937	0.937	0.937	0.974	0.974	0.989	0.989	1	1	ID	1	1	1	1	0.996	1	1	1	1	1	1	1	1	1	1	0.996	1	1	1	1	1	1	1	1	1	0.996	1	1	0.996	0.996	0.996	0.996	1	1	1	1	1
23608	0.93	0.926	0.937	0.937	0.937	0.974	0.974	0.989	0.989	1	1	1	ID	1	1	1	0.996	1	1	1	1	1	1	1	1	1	1	0.996	1	1	1	1	1	1	1	1	1	0.996	1	1	0.996	0.996	0.996	0.996	1	1	1	1	1
23608-1K	0.93	0.926	0.937	0.937	0.937	0.974	0.974	0.989	0.989	1	1	1	1	ID	1	1	0.996	1	1	1	1	1	1	1	1	1	1	0.996	1	1	1	1	1	1	1	1	1	0.996	1	1	0.996	0.996	0.996	0.996	1	1	1	1	1
3306-2	0.93	0.926	0.937	0.937	0.937	0.974	0.974	0.989	0.989	1	1	1	1	1	ID	1	0.996	1	1	1	1	1	1	1	1	1	1	0.996	1	1	1	1	1	1	1	1	1	0.996	1	1	0.996	0.996	0.996	0.996	1	1	1	1	1
3306-1	0.93	0.926	0.937	0.937	0.937	0.974	0.974	0.989	0.989	1	1	1	1	1	1	ID	0.996	1	1	1	1	1	1	1	1	1	1	0.996	1	1	1	1	1	1	1	1	1	0.996	1	1	0.996	0.996	0.996	0.996	1	1	1	1	1
63	0.926	0.923	0.934	0.934	0.934	0.97	0.97	0.985	0.985	0.996	0.996	0.996	0.996	0.996	0.996	0.996	ID	0.996	0.996	0.996	0.996	0.996	0.996	0.996	0.996	0.996	0.996	0.992	0.996	0.996	0.996	0.996	0.996	0.996	0.996	0.996	0.996	0.992	0.996	0.996	0.992	0.992	0.992	0.992	0.996	0.996	0.996	0.996	0.996
21312	0.93	0.926	0.937	0.937	0.937	0.974	0.974	0.989	0.989	1	1	1	1	1	1	1	0.996	ID	1	1	1	1	1	1	1	1	1	0.996	1	1	1	1	1	1	1	1	1	0.996	1	1	0.996	0.996	0.996	0.996	1	1	1	1	1
23404	0.93	0.926	0.937	0.937	0.937	0.974	0.974	0.989	0.989	1	1	1	1	1	1	1	0.996	1	ID	1	1	1	1	1	1	1	1	0.996	1	1	1	1	1	1	1	1	1	0.996	1	1	0.996	0.996	0.996	0.996	1	1	1	1	1
23404-2T	0.93	0.926	0.937	0.937	0.937	0.974	0.974	0.989	0.989	1	1	1	1	1	1	1	0.996	1	1	ID	1	1	1	1	1	1	1	0.996	1	1	1	1	1	1	1	1	1	0.996	1	1	0.996	0.996	0.996	0.996	1	1	1	1	1
23404-4K	0.93	0.926	0.937	0.937	0.937	0.974	0.974	0.989	0.989	1	1	1	1	1	1	1	0.996	1	1	1	ID	1	1	1	1	1	1	0.996	1	1	1	1	1	1	1	1	1	0.996	1	1	0.996	0.996	0.996	0.996	1	1	1	1	1
23404-2K	0.93	0.926	0.937	0.937	0.937	0.974	0.974	0.989	0.989	1	1	1	1	1	1	1	0.996	1	1	1	1	ID	1	1	1	1	1	0.996	1	1	1	1	1	1	1	1	1	0.996	1	1	0.996	0.996	0.996	0.996	1	1	1	1	1
23404-4T	0.93	0.926	0.937	0.937	0.937	0.974	0.974	0.989	0.989	1	1	1	1	1	1	1	0.996	1	1	1	1	1	ID	1	1	1	1	0.996	1	1	1	1	1	1	1	1	1	0.996	1	1	0.996	0.996	0.996	0.996	1	1	1	1	1
22477-2	0.93	0.926	0.937	0.937	0.937	0.974	0.974	0.989	0.989	1	1	1	1	1	1	1	0.996	1	1	1	1	1	1	ID	1	1	1	0.996	1	1	1	1	1	1	1	1	1	0.996	1	1	0.996	0.996	0.996	0.996	1	1	1	1	1
22684	0.93	0.926	0.937	0.937	0.937	0.974	0.974	0.989	0.989	1	1	1	1	1	1	1	0.996	1	1	1	1	1	1	1	ID	1	1	0.996	1	1	1	1	1	1	1	1	1	0.996	1	1	0.996	0.996	0.996	0.996	1	1	1	1	1
22477-1	0.93	0.926	0.937	0.937	0.937	0.974	0.974	0.989	0.989	1	1	1	1	1	1	1	0.996	1	1	1	1	1	1	1	1	ID	1	0.996	1	1	1	1	1	1	1	1	1	0.996	1	1	0.996	0.996	0.996	0.996	1	1	1	1	1
25702-2	0.93	0.926	0.937	0.937	0.937	0.974	0.974	0.989	0.989	1	1	1	1	1	1	1	0.996	1	1	1	1	1	1	1	1	1	ID	0.996	1	1	1	1	1	1	1	1	1	0.996	1	1	0.996	0.996	0.996	0.996	1	1	1	1	1
2755	0.934	0.93	0.941	0.941	0.941	0.978	0.978	0.985	0.985	0.996	0.996	0.996	0.996	0.996	0.996	0.996	0.992	0.996	0.996	0.996	0.996	0.996	0.996	0.996	0.996	0.996	0.996	ID	0.996	0.996	0.996	0.996	0.996	0.996	0.996	0.996	0.996	0.992	0.996	0.996	0.992	0.992	0.992	0.992	0.996	0.996	0.996	0.996	0.996
25827-2	0.93	0.926	0.937	0.937	0.937	0.974	0.974	0.989	0.989	1	1	1	1	1	1	1	0.996	1	1	1	1	1	1	1	1	1	1	0.996	ID	1	1	1	1	1	1	1	1	0.996	1	1	0.996	0.996	0.996	0.996	1	1	1	1	1
25827-1	0.93	0.926	0.937	0.937	0.937	0.974	0.974	0.989	0.989	1	1	1	1	1	1	1	0.996	1	1	1	1	1	1	1	1	1	1	0.996	1	ID	1	1	1	1	1	1	1	0.996	1	1	0.996	0.996	0.996	0.996	1	1	1	1	1
25827-3	0.93	0.926	0.937	0.937	0.937	0.974	0.974	0.989	0.989	1	1	1	1	1	1	1	0.996	1	1	1	1	1	1	1	1	1	1	0.996	1	1	ID	1	1	1	1	1	1	0.996	1	1	0.996	0.996	0.996	0.996	1	1	1	1	1
61-1	0.93	0.926	0.937	0.937	0.937	0.974	0.974	0.989	0.989	1	1	1	1	1	1	1	0.996	1	1	1	1	1	1	1	1	1	1	0.996	1	1	1	ID	1	1	1	1	1	0.996	1	1	0.996	0.996	0.996	0.996	1	1	1	1	1
61-2	0.93	0.926	0.937	0.937	0.937	0.974	0.974	0.989	0.989	1	1	1	1	1	1	1	0.996	1	1	1	1	1	1	1	1	1	1	0.996	1	1	1	1	ID	1	1	1	1	0.996	1	1	0.996	0.996	0.996	0.996	1	1	1	1	1
785	0.93	0.926	0.937	0.937	0.937	0.974	0.974	0.989	0.989	1	1	1	1	1	1	1	0.996	1	1	1	1	1	1	1	1	1	1	0.996	1	1	1	1	1	ID	1	1	1	0.996	1	1	0.996	0.996	0.996	0.996	1	1	1	1	1
22608-1	0.93	0.926	0.937	0.937	0.937	0.974	0.974	0.989	0.989	1	1	1	1	1	1	1	0.996	1	1	1	1	1	1	1	1	1	1	0.996	1	1	1	1	1	1	ID	1	1	0.996	1	1	0.996	0.996	0.996	0.996	1	1	1	1	1
22608-2	0.93	0.926	0.937	0.937	0.937	0.974	0.974	0.989	0.989	1	1	1	1	1	1	1	0.996	1	1	1	1	1	1	1	1	1	1	0.996	1	1	1	1	1	1	1	ID	1	0.996	1	1	0.996	0.996	0.996	0.996	1	1	1	1	1
22224-3T	0.93	0.926	0.937	0.937	0.937	0.974	0.974	0.989	0.989	1	1	1	1	1	1	1	0.996	1	1	1	1	1	1	1	1	1	1	0.996	1	1	1	1	1	1	1	1	ID	0.996	1	1	0.996	0.996	0.996	0.996	1	1	1	1	1
22608-3T	0.934	0.93	0.934	0.934	0.934	0.97	0.97	0.985	0.985	0.996	0.996	0.996	0.996	0.996	0.996	0.996	0.992	0.996	0.996	0.996	0.996	0.996	0.996	0.996	0.996	0.996	0.996	0.992	0.996	0.996	0.996	0.996	0.996	0.996	0.996	0.996	0.996	ID	0.996	0.996	0.992	0.992	0.992	0.992	0.996	0.996	0.996	0.996	0.996
22750	0.93	0.926	0.937	0.937	0.937	0.974	0.974	0.989	0.989	1	1	1	1	1	1	1	0.996	1	1	1	1	1	1	1	1	1	1	0.996	1	1	1	1	1	1	1	1	1	0.996	ID	1	0.996	0.996	0.996	0.996	1	1	1	1	1
22224-2T	0.93	0.926	0.937	0.937	0.937	0.974	0.974	0.989	0.989	1	1	1	1	1	1	1	0.996	1	1	1	1	1	1	1	1	1	1	0.996	1	1	1	1	1	1	1	1	1	0.996	1	ID	0.996	0.996	0.996	0.996	1	1	1	1	1
785	0.926	0.923	0.934	0.934	0.934	0.978	0.978	0.985	0.985	0.996	0.996	0.996	0.996	0.996	0.996	0.996	0.992	0.996	0.996	0.996	0.996	0.996	0.996	0.996	0.996	0.996	0.996	0.992	0.996	0.996	0.996	0.996	0.996	0.996	0.996	0.996	0.996	0.992	0.996	0.996	ID	1	1	1	0.996	0.996	0.996	0.996	0.996
913	0.926	0.923	0.934	0.934	0.934	0.978	0.978	0.985	0.985	0.996	0.996	0.996	0.996	0.996	0.996	0.996	0.992	0.996	0.996	0.996	0.996	0.996	0.996	0.996	0.996	0.996	0.996	0.992	0.996	0.996	0.996	0.996	0.996	0.996	0.996	0.996	0.996	0.992	0.996	0.996	1	ID	1	1	0.996	0.996	0.996	0.996	0.996
913	0.926	0.923	0.934	0.934	0.934	0.978	0.978	0.985	0.985	0.996	0.996	0.996	0.996	0.996	0.996	0.996	0.992	0.996	0.996	0.996	0.996	0.996	0.996	0.996	0.996	0.996	0.996	0.992	0.996	0.996	0.996	0.996	0.996	0.996	0.996	0.996	0.996	0.992	0.996	0.996	1	1	ID	1	0.996	0.996	0.996	0.996	0.996
913	0.926	0.923	0.934	0.934	0.934	0.978	0.978	0.985	0.985	0.996	0.996	0.996	0.996	0.996	0.996	0.996	0.992	0.996	0.996	0.996	0.996	0.996	0.996	0.996	0.996	0.996	0.996	0.992	0.996	0.996	0.996	0.996	0.996	0.996	0.996	0.996	0.996	0.992	0.996	0.996	1	1	1	ID	0.996	0.996	0.996	0.996	0.996
23589-1T	0.93	0.926	0.937	0.937	0.937	0.974	0.974	0.989	0.989	1	1	1	1	1	1	1	0.996	1	1	1	1	1	1	1	1	1	1	0.996	1	1	1	1	1	1	1	1	1	0.996	1	1	0.996	0.996	0.996	0.996	ID	1	1	1	1
22608-2T	0.93	0.926	0.937	0.937	0.937	0.974	0.974	0.989	0.989	1	1	1	1	1	1	1	0.996	1	1	1	1	1	1	1	1	1	1	0.996	1	1	1	1	1	1	1	1	1	0.996	1	1	0.996	0.996	0.996	0.996	1	ID	1	1	1
23589-3	0.93	0.926	0.937	0.937	0.937	0.974	0.974	0.989	0.989	1	1	1	1	1	1	1	0.996	1	1	1	1	1	1	1	1	1	1	0.996	1	1	1	1	1	1	1	1	1	0.996	1	1	0.996	0.996	0.996	0.996	1	1	ID	1	1
23589-1T	0.93	0.926	0.937	0.937	0.937	0.974	0.974	0.989	0.989	1	1	1	1	1	1	1	0.996	1	1	1	1	1	1	1	1	1	1	0.996	1	1	1	1	1	1	1	1	1	0.996	1	1	0.996	0.996	0.996	0.996	1	1	1	ID	1
23589-4	0.93	0.926	0.937	0.937	0.937	0.974	0.974	0.989	0.989	1	1	1	1	1	1	1	0.996	1	1	1	1	1	1	1	1	1	1	0.996	1	1	1	1	1	1	1	1	1	0.996	1	1	0.996	0.996	0.996	0.996	1	1	1	1	ID
22224-3K	0.93	0.926	0.937	0.937	0.937	0.974	0.974	0.989	0.989	1	1	1	1	1	1	1	0.996	1	1	1	1	1	1	1	1	1	1	0.996	1	1	1	1	1	1	1	1	1	0.996	1	1	0.996	0.996	0.996	0.996	1	1	1	1	1
22224-4T	0.93	0.926	0.937	0.937	0.937	0.974	0.974	0.989	0.989	1	1	1	1	1	1	1	0.996	1	1	1	1	1	1	1	1	1	1	0.996	1	1	1	1	1	1	1	1	1	0.996	1	1	0.996	0.996	0.996	0.996	1	1	1	1	1
22608-1T	0.93	0.926	0.937	0.937	0.937	0.974	0.974	0.989	0.989	1	1	1	1	1	1	1	0.996	1	1	1	1	1	1	1	1	1	1	0.996	1	1	1	1	1	1	1	1	1	0.996	1	1	0.996	0.996	0.996	0.996	1	1	1	1	1
23458-1K	0.93	0.926	0.937	0.937	0.937	0.974	0.974	0.989	0.989	1	1	1	1	1	1	1	0.996	1	1	1	1	1	1	1	1	1	1	0.996	1	1	1	1	1	1	1	1	1	0.996	1	1	0.996	0.996	0.996	0.996	1	1	1	1	1
23458-2T	0.93	0.926	0.937	0.937	0.937	0.974	0.974	0.989	0.989	1	1	1	1	1	1	1	0.996	1	1	1	1	1	1	1	1	1	1	0.996	1	1	1	1	1	1	1	1	1	0.996	1	1	0.996	0.996	0.996	0.996	1	1	1	1	1
23458-4T	0.93	0.926	0.937	0.937	0.937	0.974	0.974	0.989	0.989	1	1	1	1	1	1	1	0.996	1	1	1	1	1	1	1	1	1	1	0.996	1	1	1	1	1	1	1	1	1	0.996	1	1	0.996	0.996	0.996	0.996	1	1	1	1	1
23458-5T	0.93	0.926	0.937	0.937	0.937	0.974	0.974	0.989	0.989	1	1	1	1	1	1	1	0.996	1	1	1	1	1	1	1	1	1	1	0.996	1	1	1	1	1	1	1	1	1	0.996	1	1	0.996	0.996	0.996	0.996	1	1	1	1	1
25322-179	0.93	0.926	0.937	0.937	0.937	0.974	0.974	0.989	0.989	1	1	1	1	1	1	1	0.996	1	1	1	1	1	1	1	1	1	1	0.996	1	1	1	1	1	1	1	1	1	0.996	1	1	0.996	0.996	0.996	0.996	1	1	1	1	1
25322-205	0.93	0.926	0.937	0.937	0.937	0.974	0.974	0.989	0.989	1	1	1	1	1	1	1	0.996	1	1	1	1	1	1	1	1	1	1	0.996	1	1	1	1	1	1	1	1	1	0.996	1	1	0.996	0.996	0.996	0.996	1	1	1	1	1
25322-229	0.93	0.926	0.937	0.937	0.937	0.974	0.974	0.989	0.989	1	1	1	1	1	1	1	0.996	1	1	1	1	1	1	1	1	1	1	0.996	1	1	1	1	1	1	1	1	1	0.996	1	1	0.996	0.996	0.996	0.996	1	1	1	1	1
Sequence Difference Count Matrix
PB1-f2-nt	20689-27T	20689-28T	2968	8028-1	8028-2	22380	25690	18520-2	18520-1	25338-1	25338-2	23609	23608	23608-1K	3306-2	3306-1	63	21312	23404	23404-2T	23404-4K	23404-2K	23404-4T	22477-2	22684	22477-1	25702-2	2755	25827-2	25827-1	25827-3	61-1	61-2	785	22608-1	22608-2	22224-3T	22608-3T	22750	22224-2T	785	913	913	913	23589-1T	22608-2T	23589-3	23589-1T	23589-4
20689-27T	ID	1	7	7	7	18	18	22	22	19	19	19	19	19	19	19	20	19	19	19	19	19	19	19	19	19	19	18	19	19	19	19	19	19	19	19	19	18	19	19	20	20	20	20	19	19	19	19	19
20689-28T	1	ID	7	7	7	19	19	23	23	20	20	20	20	20	20	20	21	20	20	20	20	20	20	20	20	20	20	19	20	20	20	20	20	20	20	20	20	19	20	20	21	21	21	21	20	20	20	20	20
2968	7	7	ID	0	0	16	16	20	20	17	17	17	17	17	17	17	18	17	17	17	17	17	17	17	17	17	17	16	17	17	17	17	17	17	17	17	17	18	17	17	18	18	18	18	17	17	17	17	17
8028-1	7	7	0	ID	0	16	16	20	20	17	17	17	17	17	17	17	18	17	17	17	17	17	17	17	17	17	17	16	17	17	17	17	17	17	17	17	17	18	17	17	18	18	18	18	17	17	17	17	17
8028-2	7	7	0	0	ID	16	16	20	20	17	17	17	17	17	17	17	18	17	17	17	17	17	17	17	17	17	17	16	17	17	17	17	17	17	17	17	17	18	17	17	18	18	18	18	17	17	17	17	17
22380	18	19	16	16	16	ID	0	8	8	7	7	7	7	7	7	7	8	7	7	7	7	7	7	7	7	7	7	6	7	7	7	7	7	7	7	7	7	8	7	7	6	6	6	6	7	7	7	7	7
25690	18	19	16	16	16	0	ID	8	8	7	7	7	7	7	7	7	8	7	7	7	7	7	7	7	7	7	7	6	7	7	7	7	7	7	7	7	7	8	7	7	6	6	6	6	7	7	7	7	7
18520-2	22	23	20	20	20	8	8	ID	0	3	3	3	3	3	3	3	4	3	3	3	3	3	3	3	3	3	3	4	3	3	3	3	3	3	3	3	3	4	3	3	4	4	4	4	3	3	3	3	3
18520-1	22	23	20	20	20	8	8	0	ID	3	3	3	3	3	3	3	4	3	3	3	3	3	3	3	3	3	3	4	3	3	3	3	3	3	3	3	3	4	3	3	4	4	4	4	3	3	3	3	3
25338-1	19	20	17	17	17	7	7	3	3	ID	0	0	0	0	0	0	1	0	0	0	0	0	0	0	0	0	0	1	0	0	0	0	0	0	0	0	0	1	0	0	1	1	1	1	0	0	0	0	0
25338-2	19	20	17	17	17	7	7	3	3	0	ID	0	0	0	0	0	1	0	0	0	0	0	0	0	0	0	0	1	0	0	0	0	0	0	0	0	0	1	0	0	1	1	1	1	0	0	0	0	0
23609	19	20	17	17	17	7	7	3	3	0	0	ID	0	0	0	0	1	0	0	0	0	0	0	0	0	0	0	1	0	0	0	0	0	0	0	0	0	1	0	0	1	1	1	1	0	0	0	0	0
23608	19	20	17	17	17	7	7	3	3	0	0	0	ID	0	0	0	1	0	0	0	0	0	0	0	0	0	0	1	0	0	0	0	0	0	0	0	0	1	0	0	1	1	1	1	0	0	0	0	0
23608-1K	19	20	17	17	17	7	7	3	3	0	0	0	0	ID	0	0	1	0	0	0	0	0	0	0	0	0	0	1	0	0	0	0	0	0	0	0	0	1	0	0	1	1	1	1	0	0	0	0	0
3306-2	19	20	17	17	17	7	7	3	3	0	0	0	0	0	ID	0	1	0	0	0	0	0	0	0	0	0	0	1	0	0	0	0	0	0	0	0	0	1	0	0	1	1	1	1	0	0	0	0	0
3306-1	19	20	17	17	17	7	7	3	3	0	0	0	0	0	0	ID	1	0	0	0	0	0	0	0	0	0	0	1	0	0	0	0	0	0	0	0	0	1	0	0	1	1	1	1	0	0	0	0	0
63	20	21	18	18	18	8	8	4	4	1	1	1	1	1	1	1	ID	1	1	1	1	1	1	1	1	1	1	2	1	1	1	1	1	1	1	1	1	2	1	1	2	2	2	2	1	1	1	1	1
21312	19	20	17	17	17	7	7	3	3	0	0	0	0	0	0	0	1	ID	0	0	0	0	0	0	0	0	0	1	0	0	0	0	0	0	0	0	0	1	0	0	1	1	1	1	0	0	0	0	0
23404	19	20	17	17	17	7	7	3	3	0	0	0	0	0	0	0	1	0	ID	0	0	0	0	0	0	0	0	1	0	0	0	0	0	0	0	0	0	1	0	0	1	1	1	1	0	0	0	0	0
23404-2T	19	20	17	17	17	7	7	3	3	0	0	0	0	0	0	0	1	0	0	ID	0	0	0	0	0	0	0	1	0	0	0	0	0	0	0	0	0	1	0	0	1	1	1	1	0	0	0	0	0
23404-4K	19	20	17	17	17	7	7	3	3	0	0	0	0	0	0	0	1	0	0	0	ID	0	0	0	0	0	0	1	0	0	0	0	0	0	0	0	0	1	0	0	1	1	1	1	0	0	0	0	0
23404-2K	19	20	17	17	17	7	7	3	3	0	0	0	0	0	0	0	1	0	0	0	0	ID	0	0	0	0	0	1	0	0	0	0	0	0	0	0	0	1	0	0	1	1	1	1	0	0	0	0	0
23404-4T	19	20	17	17	17	7	7	3	3	0	0	0	0	0	0	0	1	0	0	0	0	0	ID	0	0	0	0	1	0	0	0	0	0	0	0	0	0	1	0	0	1	1	1	1	0	0	0	0	0
22477-2	19	20	17	17	17	7	7	3	3	0	0	0	0	0	0	0	1	0	0	0	0	0	0	ID	0	0	0	1	0	0	0	0	0	0	0	0	0	1	0	0	1	1	1	1	0	0	0	0	0
22684	19	20	17	17	17	7	7	3	3	0	0	0	0	0	0	0	1	0	0	0	0	0	0	0	ID	0	0	1	0	0	0	0	0	0	0	0	0	1	0	0	1	1	1	1	0	0	0	0	0
22477-1	19	20	17	17	17	7	7	3	3	0	0	0	0	0	0	0	1	0	0	0	0	0	0	0	0	ID	0	1	0	0	0	0	0	0	0	0	0	1	0	0	1	1	1	1	0	0	0	0	0
25702-2	19	20	17	17	17	7	7	3	3	0	0	0	0	0	0	0	1	0	0	0	0	0	0	0	0	0	ID	1	0	0	0	0	0	0	0	0	0	1	0	0	1	1	1	1	0	0	0	0	0
2755	18	19	16	16	16	6	6	4	4	1	1	1	1	1	1	1	2	1	1	1	1	1	1	1	1	1	1	ID	1	1	1	1	1	1	1	1	1	2	1	1	2	2	2	2	1	1	1	1	1
25827-2	19	20	17	17	17	7	7	3	3	0	0	0	0	0	0	0	1	0	0	0	0	0	0	0	0	0	0	1	ID	0	0	0	0	0	0	0	0	1	0	0	1	1	1	1	0	0	0	0	0
25827-1	19	20	17	17	17	7	7	3	3	0	0	0	0	0	0	0	1	0	0	0	0	0	0	0	0	0	0	1	0	ID	0	0	0	0	0	0	0	1	0	0	1	1	1	1	0	0	0	0	0
25827-3	19	20	17	17	17	7	7	3	3	0	0	0	0	0	0	0	1	0	0	0	0	0	0	0	0	0	0	1	0	0	ID	0	0	0	0	0	0	1	0	0	1	1	1	1	0	0	0	0	0
61-1	19	20	17	17	17	7	7	3	3	0	0	0	0	0	0	0	1	0	0	0	0	0	0	0	0	0	0	1	0	0	0	ID	0	0	0	0	0	1	0	0	1	1	1	1	0	0	0	0	0
61-2	19	20	17	17	17	7	7	3	3	0	0	0	0	0	0	0	1	0	0	0	0	0	0	0	0	0	0	1	0	0	0	0	ID	0	0	0	0	1	0	0	1	1	1	1	0	0	0	0	0
785	19	20	17	17	17	7	7	3	3	0	0	0	0	0	0	0	1	0	0	0	0	0	0	0	0	0	0	1	0	0	0	0	0	ID	0	0	0	1	0	0	1	1	1	1	0	0	0	0	0
22608-1	19	20	17	17	17	7	7	3	3	0	0	0	0	0	0	0	1	0	0	0	0	0	0	0	0	0	0	1	0	0	0	0	0	0	ID	0	0	1	0	0	1	1	1	1	0	0	0	0	0
22608-2	19	20	17	17	17	7	7	3	3	0	0	0	0	0	0	0	1	0	0	0	0	0	0	0	0	0	0	1	0	0	0	0	0	0	0	ID	0	1	0	0	1	1	1	1	0	0	0	0	0
22224-3T	19	20	17	17	17	7	7	3	3	0	0	0	0	0	0	0	1	0	0	0	0	0	0	0	0	0	0	1	0	0	0	0	0	0	0	0	ID	1	0	0	1	1	1	1	0	0	0	0	0
22608-3T	18	19	18	18	18	8	8	4	4	1	1	1	1	1	1	1	2	1	1	1	1	1	1	1	1	1	1	2	1	1	1	1	1	1	1	1	1	ID	1	1	2	2	2	2	1	1	1	1	1
22750	19	20	17	17	17	7	7	3	3	0	0	0	0	0	0	0	1	0	0	0	0	0	0	0	0	0	0	1	0	0	0	0	0	0	0	0	0	1	ID	0	1	1	1	1	0	0	0	0	0
22224-2T	19	20	17	17	17	7	7	3	3	0	0	0	0	0	0	0	1	0	0	0	0	0	0	0	0	0	0	1	0	0	0	0	0	0	0	0	0	1	0	ID	1	1	1	1	0	0	0	0	0
785	20	21	18	18	18	6	6	4	4	1	1	1	1	1	1	1	2	1	1	1	1	1	1	1	1	1	1	2	1	1	1	1	1	1	1	1	1	2	1	1	ID	0	0	0	1	1	1	1	1
913	20	21	18	18	18	6	6	4	4	1	1	1	1	1	1	1	2	1	1	1	1	1	1	1	1	1	1	2	1	1	1	1	1	1	1	1	1	2	1	1	0	ID	0	0	1	1	1	1	1
913	20	21	18	18	18	6	6	4	4	1	1	1	1	1	1	1	2	1	1	1	1	1	1	1	1	1	1	2	1	1	1	1	1	1	1	1	1	2	1	1	0	0	ID	0	1	1	1	1	1
913	20	21	18	18	18	6	6	4	4	1	1	1	1	1	1	1	2	1	1	1	1	1	1	1	1	1	1	2	1	1	1	1	1	1	1	1	1	2	1	1	0	0	0	ID	1	1	1	1	1
23589-1T	19	20	17	17	17	7	7	3	3	0	0	0	0	0	0	0	1	0	0	0	0	0	0	0	0	0	0	1	0	0	0	0	0	0	0	0	0	1	0	0	1	1	1	1	ID	0	0	0	0
22608-2T	19	20	17	17	17	7	7	3	3	0	0	0	0	0	0	0	1	0	0	0	0	0	0	0	0	0	0	1	0	0	0	0	0	0	0	0	0	1	0	0	1	1	1	1	0	ID	0	0	0
23589-3	19	20	17	17	17	7	7	3	3	0	0	0	0	0	0	0	1	0	0	0	0	0	0	0	0	0	0	1	0	0	0	0	0	0	0	0	0	1	0	0	1	1	1	1	0	0	ID	0	0
23589-1T	19	20	17	17	17	7	7	3	3	0	0	0	0	0	0	0	1	0	0	0	0	0	0	0	0	0	0	1	0	0	0	0	0	0	0	0	0	1	0	0	1	1	1	1	0	0	0	ID	0
23589-4	19	20	17	17	17	7	7	3	3	0	0	0	0	0	0	0	1	0	0	0	0	0	0	0	0	0	0	1	0	0	0	0	0	0	0	0	0	1	0	0	1	1	1	1	0	0	0	0	ID
22224-3K	19	20	17	17	17	7	7	3	3	0	0	0	0	0	0	0	1	0	0	0	0	0	0	0	0	0	0	1	0	0	0	0	0	0	0	0	0	1	0	0	1	1	1	1	0	0	0	0	0
22224-4T	19	20	17	17	17	7	7	3	3	0	0	0	0	0	0	0	1	0	0	0	0	0	0	0	0	0	0	1	0	0	0	0	0	0	0	0	0	1	0	0	1	1	1	1	0	0	0	0	0
22608-1T	19	20	17	17	17	7	7	3	3	0	0	0	0	0	0	0	1	0	0	0	0	0	0	0	0	0	0	1	0	0	0	0	0	0	0	0	0	1	0	0	1	1	1	1	0	0	0	0	0
23458-1K	19	20	17	17	17	7	7	3	3	0	0	0	0	0	0	0	1	0	0	0	0	0	0	0	0	0	0	1	0	0	0	0	0	0	0	0	0	1	0	0	1	1	1	1	0	0	0	0	0
23458-2T	19	20	17	17	17	7	7	3	3	0	0	0	0	0	0	0	1	0	0	0	0	0	0	0	0	0	0	1	0	0	0	0	0	0	0	0	0	1	0	0	1	1	1	1	0	0	0	0	0
23458-4T	19	20	17	17	17	7	7	3	3	0	0	0	0	0	0	0	1	0	0	0	0	0	0	0	0	0	0	1	0	0	0	0	0	0	0	0	0	1	0	0	1	1	1	1	0	0	0	0	0
23458-5T	19	20	17	17	17	7	7	3	3	0	0	0	0	0	0	0	1	0	0	0	0	0	0	0	0	0	0	1	0	0	0	0	0	0	0	0	0	1	0	0	1	1	1	1	0	0	0	0	0
25322-179	19	20	17	17	17	7	7	3	3	0	0	0	0	0	0	0	1	0	0	0	0	0	0	0	0	0	0	1	0	0	0	0	0	0	0	0	0	1	0	0	1	1	1	1	0	0	0	0	0
25322-205	19	20	17	17	17	7	7	3	3	0	0	0	0	0	0	0	1	0	0	0	0	0	0	0	0	0	0	1	0	0	0	0	0	0	0	0	0	1	0	0	1	1	1	1	0	0	0	0	0
25322-229	19	20	17	17	17	7	7	3	3	0	0	0	0	0	0	0	1	0	0	0	0	0	0	0	0	0	0	1	0	0	0	0	0	0	0	0	0	1	0	0	1	1	1	1	0	0	0	0	0
[truncated: 70 more columns]

## Sheet: PA
Sequence Identity Matrix
PA-nt	3306-2	3306-1	25338-2	23609	23608	23608-1K	25338-1	20689-27T	20689-28T	25690	22380	2968	8028-1	8028-2	18520-2	18520-1	63	21312	23404	23404-2T	23404-4K	23404-2K	23404-4T	2755	25702-2	22477-2	25827-3	25827-2	25827-1	22477-1	22684	61-1	61-2	785	22224-4T	22224-3K	23589-3	23589-4	23589-1T	22224-2T	22224-3T	23458-1K	22750	22608-1T	22608-2T	22608-3T	22608-1	22608-2	23589-1T
3306-2	ID	1	0.986	0.986	0.987	0.987	0.987	0.961	0.961	0.951	0.955	0.959	0.957	0.957	0.955	0.955	0.956	0.956	0.953	0.953	0.953	0.953	0.953	0.953	0.954	0.955	0.955	0.955	0.955	0.955	0.955	0.954	0.954	0.955	0.956	0.956	0.956	0.956	0.956	0.956	0.956	0.955	0.955	0.955	0.955	0.955	0.955	0.955	0.956
3306-1	1	ID	0.986	0.986	0.987	0.987	0.987	0.961	0.961	0.951	0.955	0.959	0.957	0.957	0.955	0.955	0.956	0.956	0.953	0.953	0.953	0.953	0.953	0.953	0.954	0.955	0.955	0.955	0.955	0.955	0.955	0.954	0.954	0.955	0.956	0.956	0.956	0.956	0.956	0.956	0.956	0.955	0.955	0.955	0.955	0.955	0.955	0.955	0.956
25338-2	0.986	0.986	ID	0.999	0.999	0.999	0.999	0.958	0.958	0.949	0.953	0.957	0.955	0.956	0.953	0.953	0.954	0.954	0.951	0.951	0.951	0.951	0.951	0.95	0.951	0.952	0.952	0.952	0.952	0.952	0.952	0.952	0.952	0.953	0.953	0.954	0.954	0.954	0.953	0.954	0.954	0.952	0.952	0.953	0.953	0.953	0.953	0.953	0.954
23609	0.986	0.986	0.999	ID	0.999	0.999	0.999	0.958	0.958	0.949	0.953	0.957	0.955	0.956	0.953	0.953	0.954	0.954	0.952	0.951	0.951	0.951	0.951	0.95	0.951	0.952	0.952	0.952	0.952	0.952	0.952	0.952	0.952	0.953	0.953	0.954	0.954	0.954	0.953	0.954	0.954	0.952	0.952	0.953	0.953	0.953	0.953	0.953	0.954
23608	0.987	0.987	0.999	0.999	ID	1	1	0.959	0.959	0.949	0.953	0.957	0.955	0.956	0.953	0.953	0.954	0.954	0.951	0.952	0.952	0.952	0.952	0.951	0.952	0.952	0.952	0.952	0.952	0.952	0.952	0.952	0.952	0.953	0.954	0.954	0.954	0.954	0.954	0.954	0.954	0.953	0.953	0.953	0.953	0.953	0.953	0.953	0.954
23608-1K	0.987	0.987	0.999	0.999	1	ID	1	0.959	0.959	0.949	0.953	0.957	0.955	0.956	0.953	0.953	0.954	0.954	0.951	0.952	0.952	0.952	0.952	0.951	0.952	0.952	0.952	0.952	0.952	0.952	0.952	0.952	0.952	0.953	0.954	0.954	0.954	0.954	0.954	0.954	0.954	0.953	0.953	0.953	0.953	0.953	0.953	0.953	0.954
25338-1	0.987	0.987	0.999	0.999	1	1	ID	0.959	0.959	0.949	0.953	0.957	0.955	0.956	0.953	0.953	0.954	0.954	0.951	0.952	0.952	0.952	0.952	0.951	0.952	0.952	0.952	0.952	0.952	0.952	0.952	0.952	0.952	0.953	0.954	0.954	0.954	0.954	0.954	0.954	0.954	0.953	0.953	0.953	0.953	0.953	0.953	0.953	0.954
20689-27T	0.961	0.961	0.958	0.958	0.959	0.959	0.959	ID	1	0.959	0.963	0.968	0.966	0.968	0.964	0.964	0.965	0.966	0.963	0.963	0.963	0.963	0.963	0.962	0.963	0.963	0.963	0.963	0.963	0.963	0.963	0.964	0.964	0.965	0.965	0.966	0.966	0.966	0.965	0.966	0.966	0.964	0.964	0.965	0.965	0.965	0.965	0.965	0.966
20689-28T	0.961	0.961	0.958	0.958	0.959	0.959	0.959	1	ID	0.959	0.963	0.968	0.966	0.968	0.964	0.964	0.965	0.966	0.963	0.963	0.963	0.963	0.963	0.962	0.963	0.963	0.963	0.963	0.963	0.963	0.963	0.964	0.964	0.965	0.965	0.966	0.966	0.966	0.965	0.966	0.966	0.964	0.964	0.965	0.965	0.965	0.965	0.965	0.966
25690	0.951	0.951	0.949	0.949	0.949	0.949	0.949	0.959	0.959	ID	0.994	0.978	0.975	0.976	0.973	0.973	0.972	0.973	0.97	0.971	0.971	0.971	0.971	0.97	0.971	0.971	0.971	0.971	0.971	0.971	0.971	0.972	0.972	0.973	0.973	0.973	0.973	0.973	0.973	0.973	0.973	0.972	0.972	0.973	0.973	0.973	0.973	0.973	0.973
22380	0.955	0.955	0.953	0.953	0.953	0.953	0.953	0.963	0.963	0.994	ID	0.981	0.979	0.98	0.977	0.977	0.975	0.977	0.974	0.974	0.974	0.974	0.974	0.973	0.974	0.975	0.975	0.975	0.975	0.975	0.975	0.975	0.975	0.976	0.977	0.977	0.977	0.977	0.977	0.977	0.977	0.975	0.976	0.976	0.976	0.976	0.976	0.976	0.977
2968	0.959	0.959	0.957	0.957	0.957	0.957	0.957	0.968	0.968	0.978	0.981	ID	0.997	0.997	0.982	0.982	0.983	0.984	0.98	0.981	0.981	0.981	0.981	0.981	0.982	0.982	0.982	0.982	0.982	0.982	0.982	0.982	0.982	0.983	0.983	0.984	0.984	0.984	0.983	0.984	0.984	0.982	0.982	0.983	0.983	0.983	0.983	0.983	0.984
8028-1	0.957	0.957	0.955	0.955	0.955	0.955	0.955	0.966	0.966	0.975	0.979	0.997	ID	0.998	0.98	0.98	0.98	0.981	0.978	0.978	0.978	0.978	0.978	0.978	0.979	0.98	0.98	0.98	0.98	0.98	0.98	0.979	0.979	0.98	0.981	0.981	0.981	0.981	0.98	0.981	0.981	0.98	0.981	0.98	0.98	0.98	0.98	0.98	0.981
8028-2	0.957	0.957	0.956	0.956	0.956	0.956	0.956	0.968	0.968	0.976	0.98	0.997	0.998	ID	0.981	0.981	0.981	0.982	0.979	0.979	0.979	0.979	0.979	0.978	0.979	0.98	0.98	0.98	0.98	0.98	0.98	0.98	0.98	0.981	0.982	0.982	0.982	0.982	0.981	0.982	0.982	0.981	0.982	0.981	0.981	0.981	0.981	0.981	0.982
18520-2	0.955	0.955	0.953	0.953	0.953	0.953	0.953	0.964	0.964	0.973	0.977	0.982	0.98	0.981	ID	0.999	0.985	0.987	0.984	0.985	0.985	0.985	0.985	0.983	0.984	0.984	0.984	0.984	0.984	0.984	0.984	0.985	0.985	0.986	0.987	0.987	0.987	0.987	0.986	0.987	0.987	0.985	0.986	0.986	0.986	0.986	0.986	0.986	0.987
18520-1	0.955	0.955	0.953	0.953	0.953	0.953	0.953	0.964	0.964	0.973	0.977	0.982	0.98	0.981	0.999	ID	0.985	0.987	0.984	0.985	0.985	0.985	0.985	0.983	0.984	0.984	0.984	0.984	0.984	0.984	0.984	0.985	0.985	0.986	0.987	0.987	0.987	0.987	0.986	0.987	0.987	0.985	0.986	0.986	0.986	0.986	0.986	0.986	0.987
63	0.956	0.956	0.954	0.954	0.954	0.954	0.954	0.965	0.965	0.972	0.975	0.983	0.98	0.981	0.985	0.985	ID	0.997	0.994	0.994	0.994	0.994	0.994	0.992	0.993	0.994	0.994	0.994	0.994	0.994	0.994	0.993	0.993	0.994	0.994	0.995	0.995	0.995	0.994	0.995	0.995	0.993	0.994	0.994	0.994	0.994	0.994	0.994	0.995
21312	0.956	0.956	0.954	0.954	0.954	0.954	0.954	0.966	0.966	0.973	0.977	0.984	0.981	0.982	0.987	0.987	0.997	ID	0.996	0.997	0.997	0.997	0.997	0.995	0.996	0.996	0.996	0.996	0.996	0.996	0.996	0.995	0.995	0.996	0.996	0.997	0.997	0.997	0.996	0.997	0.997	0.995	0.995	0.996	0.996	0.996	0.996	0.996	0.997
23404	0.953	0.953	0.951	0.952	0.951	0.951	0.951	0.963	0.963	0.97	0.974	0.98	0.978	0.979	0.984	0.984	0.994	0.996	ID	0.999	0.999	0.999	0.999	0.995	0.996	0.997	0.997	0.997	0.997	0.997	0.997	0.992	0.992	0.993	0.993	0.994	0.994	0.994	0.993	0.994	0.994	0.992	0.992	0.993	0.993	0.993	0.993	0.993	0.994
23404-2T	0.953	0.953	0.951	0.951	0.952	0.952	0.952	0.963	0.963	0.971	0.974	0.981	0.978	0.979	0.985	0.985	0.994	0.997	0.999	ID	1	1	1	0.996	0.997	0.997	0.997	0.997	0.997	0.997	0.997	0.992	0.992	0.993	0.994	0.994	0.994	0.994	0.993	0.994	0.994	0.992	0.993	0.993	0.993	0.993	0.993	0.993	0.994
23404-4K	0.953	0.953	0.951	0.951	0.952	0.952	0.952	0.963	0.963	0.971	0.974	0.981	0.978	0.979	0.985	0.985	0.994	0.997	0.999	1	ID	1	1	0.996	0.997	0.997	0.997	0.997	0.997	0.997	0.997	0.992	0.992	0.993	0.994	0.994	0.994	0.994	0.993	0.994	0.994	0.992	0.993	0.993	0.993	0.993	0.993	0.993	0.994
23404-2K	0.953	0.953	0.951	0.951	0.952	0.952	0.952	0.963	0.963	0.971	0.974	0.981	0.978	0.979	0.985	0.985	0.994	0.997	0.999	1	1	ID	1	0.996	0.997	0.997	0.997	0.997	0.997	0.997	0.997	0.992	0.992	0.993	0.994	0.994	0.994	0.994	0.993	0.994	0.994	0.992	0.993	0.993	0.993	0.993	0.993	0.993	0.994
23404-4T	0.953	0.953	0.951	0.951	0.952	0.952	0.952	0.963	0.963	0.971	0.974	0.981	0.978	0.979	0.985	0.985	0.994	0.997	0.999	1	1	1	ID	0.996	0.997	0.997	0.997	0.997	0.997	0.997	0.997	0.992	0.992	0.993	0.994	0.994	0.994	0.994	0.993	0.994	0.994	0.992	0.993	0.993	0.993	0.993	0.993	0.993	0.994
2755	0.953	0.953	0.95	0.95	0.951	0.951	0.951	0.962	0.962	0.97	0.973	0.981	0.978	0.978	0.983	0.983	0.992	0.995	0.995	0.996	0.996	0.996	0.996	ID	0.998	0.998	0.998	0.998	0.998	0.998	0.998	0.99	0.99	0.991	0.992	0.992	0.992	0.992	0.991	0.992	0.992	0.99	0.991	0.991	0.991	0.991	0.991	0.991	0.992
25702-2	0.954	0.954	0.951	0.951	0.952	0.952	0.952	0.963	0.963	0.971	0.974	0.982	0.979	0.979	0.984	0.984	0.993	0.996	0.996	0.997	0.997	0.997	0.997	0.998	ID	0.999	0.999	0.999	0.999	0.999	0.999	0.991	0.991	0.992	0.993	0.993	0.993	0.993	0.992	0.993	0.993	0.991	0.992	0.992	0.992	0.992	0.992	0.992	0.993
22477-2	0.955	0.955	0.952	0.952	0.952	0.952	0.952	0.963	0.963	0.971	0.975	0.982	0.98	0.98	0.984	0.984	0.994	0.996	0.997	0.997	0.997	0.997	0.997	0.998	0.999	ID	1	1	1	1	1	0.992	0.992	0.993	0.993	0.994	0.994	0.994	0.993	0.994	0.994	0.992	0.992	0.993	0.993	0.993	0.993	0.993	0.994
25827-3	0.955	0.955	0.952	0.952	0.952	0.952	0.952	0.963	0.963	0.971	0.975	0.982	0.98	0.98	0.984	0.984	0.994	0.996	0.997	0.997	0.997	0.997	0.997	0.998	0.999	1	ID	1	1	1	1	0.992	0.992	0.993	0.993	0.994	0.994	0.994	0.993	0.994	0.994	0.992	0.992	0.993	0.993	0.993	0.993	0.993	0.994
25827-2	0.955	0.955	0.952	0.952	0.952	0.952	0.952	0.963	0.963	0.971	0.975	0.982	0.98	0.98	0.984	0.984	0.994	0.996	0.997	0.997	0.997	0.997	0.997	0.998	0.999	1	1	ID	1	1	1	0.992	0.992	0.993	0.993	0.994	0.994	0.994	0.993	0.994	0.994	0.992	0.992	0.993	0.993	0.993	0.993	0.993	0.994
25827-1	0.955	0.955	0.952	0.952	0.952	0.952	0.952	0.963	0.963	0.971	0.975	0.982	0.98	0.98	0.984	0.984	0.994	0.996	0.997	0.997	0.997	0.997	0.997	0.998	0.999	1	1	1	ID	1	1	0.992	0.992	0.993	0.993	0.994	0.994	0.994	0.993	0.994	0.994	0.992	0.992	0.993	0.993	0.993	0.993	0.993	0.994
22477-1	0.955	0.955	0.952	0.952	0.952	0.952	0.952	0.963	0.963	0.971	0.975	0.982	0.98	0.98	0.984	0.984	0.994	0.996	0.997	0.997	0.997	0.997	0.997	0.998	0.999	1	1	1	1	ID	1	0.992	0.992	0.993	0.993	0.994	0.994	0.994	0.993	0.994	0.994	0.992	0.992	0.993	0.993	0.993	0.993	0.993	0.994
22684	0.955	0.955	0.952	0.952	0.952	0.952	0.952	0.963	0.963	0.971	0.975	0.982	0.98	0.98	0.984	0.984	0.994	0.996	0.997	0.997	0.997	0.997	0.997	0.998	0.999	1	1	1	1	1	ID	0.992	0.992	0.993	0.993	0.994	0.994	0.994	0.993	0.994	0.994	0.992	0.992	0.993	0.993	0.993	0.993	0.993	0.994
61-1	0.954	0.954	0.952	0.952	0.952	0.952	0.952	0.964	0.964	0.972	0.975	0.982	0.979	0.98	0.985	0.985	0.993	0.995	0.992	0.992	0.992	0.992	0.992	0.99	0.991	0.992	0.992	0.992	0.992	0.992	0.992	ID	1	0.995	0.995	0.996	0.996	0.996	0.995	0.996	0.996	0.994	0.994	0.995	0.995	0.995	0.995	0.995	0.996
61-2	0.954	0.954	0.952	0.952	0.952	0.952	0.952	0.964	0.964	0.972	0.975	0.982	0.979	0.98	0.985	0.985	0.993	0.995	0.992	0.992	0.992	0.992	0.992	0.99	0.991	0.992	0.992	0.992	0.992	0.992	0.992	1	ID	0.995	0.995	0.996	0.996	0.996	0.995	0.996	0.996	0.994	0.994	0.995	0.995	0.995	0.995	0.995	0.996
785	0.955	0.955	0.953	0.953	0.953	0.953	0.953	0.965	0.965	0.973	0.976	0.983	0.98	0.981	0.986	0.986	0.994	0.996	0.993	0.993	0.993	0.993	0.993	0.991	0.992	0.993	0.993	0.993	0.993	0.993	0.993	0.995	0.995	ID	0.998	0.999	0.999	0.999	0.998	0.999	0.999	0.997	0.997	0.998	0.998	0.998	0.998	0.998	0.999
22224-4T	0.956	0.956	0.953	0.953	0.954	0.954	0.954	0.965	0.965	0.973	0.977	0.983	0.981	0.982	0.987	0.987	0.994	0.996	0.993	0.994	0.994	0.994	0.994	0.992	0.993	0.993	0.993	0.993	0.993	0.993	0.993	0.995	0.995	0.998	ID	0.999	0.999	0.999	0.998	0.999	0.999	0.997	0.998	0.998	0.998	0.998	0.998	0.998	0.999
22224-3K	0.956	0.956	0.954	0.954	0.954	0.954	0.954	0.966	0.966	0.973	0.977	0.984	0.981	0.982	0.987	0.987	0.995	0.997	0.994	0.994	0.994	0.994	0.994	0.992	0.993	0.994	0.994	0.994	0.994	0.994	0.994	0.996	0.996	0.999	0.999	ID	1	1	0.999	1	1	0.998	0.998	0.999	0.999	0.999	0.999	0.999	1
23589-3	0.956	0.956	0.954	0.954	0.954	0.954	0.954	0.966	0.966	0.973	0.977	0.984	0.981	0.982	0.987	0.987	0.995	0.997	0.994	0.994	0.994	0.994	0.994	0.992	0.993	0.994	0.994	0.994	0.994	0.994	0.994	0.996	0.996	0.999	0.999	1	ID	1	0.999	1	1	0.998	0.998	0.999	0.999	0.999	0.999	0.999	1
23589-4	0.956	0.956	0.954	0.954	0.954	0.954	0.954	0.966	0.966	0.973	0.977	0.984	0.981	0.982	0.987	0.987	0.995	0.997	0.994	0.994	0.994	0.994	0.994	0.992	0.993	0.994	0.994	0.994	0.994	0.994	0.994	0.996	0.996	0.999	0.999	1	1	ID	0.999	1	1	0.998	0.998	0.999	0.999	0.999	0.999	0.999	1
23589-1T	0.956	0.956	0.953	0.953	0.954	0.954	0.954	0.965	0.965	0.973	0.977	0.983	0.98	0.981	0.986	0.986	0.994	0.996	0.993	0.993	0.993	0.993	0.993	0.991	0.992	0.993	0.993	0.993	0.993	0.993	0.993	0.995	0.995	0.998	0.998	0.999	0.999	0.999	ID	0.999	0.999	0.997	0.997	0.998	0.998	0.998	0.998	0.998	0.999
22224-2T	0.956	0.956	0.954	0.954	0.954	0.954	0.954	0.966	0.966	0.973	0.977	0.984	0.981	0.982	0.987	0.987	0.995	0.997	0.994	0.994	0.994	0.994	0.994	0.992	0.993	0.994	0.994	0.994	0.994	0.994	0.994	0.996	0.996	0.999	0.999	1	1	1	0.999	ID	1	0.998	0.998	0.999	0.999	0.999	0.999	0.999	1
22224-3T	0.956	0.956	0.954	0.954	0.954	0.954	0.954	0.966	0.966	0.973	0.977	0.984	0.981	0.982	0.987	0.987	0.995	0.997	0.994	0.994	0.994	0.994	0.994	0.992	0.993	0.994	0.994	0.994	0.994	0.994	0.994	0.996	0.996	0.999	0.999	1	1	1	0.999	1	ID	0.998	0.998	0.999	0.999	0.999	0.999	0.999	1
23458-1K	0.955	0.955	0.952	0.952	0.953	0.953	0.953	0.964	0.964	0.972	0.975	0.982	0.98	0.981	0.985	0.985	0.993	0.995	0.992	0.992	0.992	0.992	0.992	0.99	0.991	0.992	0.992	0.992	0.992	0.992	0.992	0.994	0.994	0.997	0.997	0.998	0.998	0.998	0.997	0.998	0.998	ID	0.998	0.998	0.998	0.998	0.998	0.998	0.998
22750	0.955	0.955	0.952	0.952	0.953	0.953	0.953	0.964	0.964	0.972	0.976	0.982	0.981	0.982	0.986	0.986	0.994	0.995	0.992	0.993	0.993	0.993	0.993	0.991	0.992	0.992	0.992	0.992	0.992	0.992	0.992	0.994	0.994	0.997	0.998	0.998	0.998	0.998	0.997	0.998	0.998	0.998	ID	0.999	0.999	0.999	0.999	0.999	0.998
22608-1T	0.955	0.955	0.953	0.953	0.953	0.953	0.953	0.965	0.965	0.973	0.976	0.983	0.98	0.981	0.986	0.986	0.994	0.996	0.993	0.993	0.993	0.993	0.993	0.991	0.992	0.993	0.993	0.993	0.993	0.993	0.993	0.995	0.995	0.998	0.998	0.999	0.999	0.999	0.998	0.999	0.999	0.998	0.999	ID	1	1	1	1	0.999
22608-2T	0.955	0.955	0.953	0.953	0.953	0.953	0.953	0.965	0.965	0.973	0.976	0.983	0.98	0.981	0.986	0.986	0.994	0.996	0.993	0.993	0.993	0.993	0.993	0.991	0.992	0.993	0.993	0.993	0.993	0.993	0.993	0.995	0.995	0.998	0.998	0.999	0.999	0.999	0.998	0.999	0.999	0.998	0.999	1	ID	1	1	1	0.999
22608-3T	0.955	0.955	0.953	0.953	0.953	0.953	0.953	0.965	0.965	0.973	0.976	0.983	0.98	0.981	0.986	0.986	0.994	0.996	0.993	0.993	0.993	0.993	0.993	0.991	0.992	0.993	0.993	0.993	0.993	0.993	0.993	0.995	0.995	0.998	0.998	0.999	0.999	0.999	0.998	0.999	0.999	0.998	0.999	1	1	ID	1	1	0.999
22608-1	0.955	0.955	0.953	0.953	0.953	0.953	0.953	0.965	0.965	0.973	0.976	0.983	0.98	0.981	0.986	0.986	0.994	0.996	0.993	0.993	0.993	0.993	0.993	0.991	0.992	0.993	0.993	0.993	0.993	0.993	0.993	0.995	0.995	0.998	0.998	0.999	0.999	0.999	0.998	0.999	0.999	0.998	0.999	1	1	1	ID	1	0.999
22608-2	0.955	0.955	0.953	0.953	0.953	0.953	0.953	0.965	0.965	0.973	0.976	0.983	0.98	0.981	0.986	0.986	0.994	0.996	0.993	0.993	0.993	0.993	0.993	0.991	0.992	0.993	0.993	0.993	0.993	0.993	0.993	0.995	0.995	0.998	0.998	0.999	0.999	0.999	0.998	0.999	0.999	0.998	0.999	1	1	1	1	ID	0.999
23589-1T	0.956	0.956	0.954	0.954	0.954	0.954	0.954	0.966	0.966	0.973	0.977	0.984	0.981	0.982	0.987	0.987	0.995	0.997	0.994	0.994	0.994	0.994	0.994	0.992	0.993	0.994	0.994	0.994	0.994	0.994	0.994	0.996	0.996	0.999	0.999	1	1	1	0.999	1	1	0.998	0.998	0.999	0.999	0.999	0.999	0.999	ID
913	0.956	0.956	0.953	0.953	0.954	0.954	0.954	0.965	0.965	0.973	0.977	0.983	0.981	0.982	0.987	0.987	0.994	0.996	0.993	0.994	0.994	0.994	0.994	0.992	0.993	0.993	0.993	0.993	0.993	0.993	0.993	0.995	0.995	0.999	0.999	0.999	0.999	0.999	0.998	0.999	0.999	0.997	0.998	0.998	0.998	0.998	0.998	0.998	0.999
913	0.956	0.956	0.953	0.953	0.954	0.954	0.954	0.965	0.965	0.973	0.977	0.983	0.981	0.982	0.987	0.987	0.994	0.996	0.993	0.994	0.994	0.994	0.994	0.992	0.993	0.993	0.993	0.993	0.993	0.993	0.993	0.995	0.995	0.999	0.999	0.999	0.999	0.999	0.998	0.999	0.999	0.997	0.998	0.998	0.998	0.998	0.998	0.998	0.999
913	0.955	0.955	0.953	0.953	0.953	0.953	0.953	0.965	0.965	0.972	0.976	0.982	0.98	0.981	0.986	0.986	0.994	0.995	0.992	0.993	0.993	0.993	0.993	0.991	0.992	0.992	0.992	0.992	0.992	0.992	0.992	0.994	0.994	0.999	0.998	0.998	0.998	0.998	0.997	0.998	0.998	0.996	0.997	0.997	0.997	0.997	0.997	0.997	0.998
785	0.956	0.956	0.954	0.954	0.954	0.954	0.954	0.965	0.965	0.972	0.976	0.982	0.98	0.981	0.986	0.986	0.994	0.995	0.992	0.993	0.993	0.993	0.993	0.991	0.992	0.992	0.992	0.992	0.992	0.992	0.992	0.994	0.994	0.995	0.996	0.996	0.996	0.996	0.995	0.996	0.996	0.994	0.995	0.995	0.995	0.995	0.995	0.995	0.996
23458-4T	0.957	0.957	0.954	0.954	0.955	0.955	0.955	0.965	0.965	0.973	0.977	0.983	0.981	0.982	0.987	0.987	0.994	0.996	0.993	0.994	0.994	0.994	0.994	0.992	0.993	0.993	0.993	0.993	0.993	0.993	0.993	0.995	0.995	0.998	0.999	0.999	0.999	0.999	0.998	0.999	0.999	0.998	0.998	0.998	0.998	0.998	0.998	0.998	0.999
23458-2T	0.957	0.957	0.954	0.954	0.955	0.955	0.955	0.965	0.965	0.973	0.977	0.983	0.981	0.982	0.987	0.987	0.994	0.996	0.993	0.994	0.994	0.994	0.994	0.992	0.993	0.993	0.993	0.993	0.993	0.993	0.993	0.995	0.995	0.998	0.999	0.999	0.999	0.999	0.998	0.999	0.999	0.998	0.998	0.998	0.998	0.998	0.998	0.998	0.999
23458-5T	0.957	0.957	0.954	0.954	0.955	0.955	0.955	0.965	0.965	0.973	0.977	0.983	0.981	0.982	0.987	0.987	0.994	0.996	0.993	0.994	0.994	0.994	0.994	0.992	0.993	0.993	0.993	0.993	0.993	0.993	0.993	0.995	0.995	0.998	0.999	0.999	0.999	0.999	0.998	0.999	0.999	0.998	0.998	0.998	0.998	0.998	0.998	0.998	0.999
25322-229	0.956	0.956	0.953	0.953	0.954	0.954	0.954	0.964	0.964	0.972	0.976	0.983	0.981	0.982	0.986	0.986	0.994	0.995	0.992	0.993	0.993	0.993	0.993	0.991	0.992	0.992	0.992	0.992	0.992	0.992	0.992	0.994	0.994	0.997	0.998	0.998	0.998	0.998	0.997	0.998	0.998	0.997	0.997	0.997	0.997	0.997	0.997	0.997	0.998
25322-179	0.956	0.956	0.954	0.954	0.954	0.954	0.954	0.965	0.965	0.973	0.976	0.984	0.981	0.982	0.986	0.986	0.994	0.996	0.993	0.993	0.993	0.993	0.993	0.991	0.992	0.993	0.993	0.993	0.993	0.993	0.993	0.995	0.995	0.998	0.998	0.999	0.999	0.999	0.998	0.999	0.999	0.997	0.997	0.998	0.998	0.998	0.998	0.998	0.999
25322-205	0.956	0.956	0.953	0.953	0.954	0.954	0.954	0.964	0.964	0.972	0.976	0.983	0.981	0.982	0.986	0.986	0.994	0.995	0.992	0.993	0.993	0.993	0.993	0.991	0.992	0.992	0.992	0.992	0.992	0.992	0.992	0.994	0.994	0.997	0.998	0.998	0.998	0.998	0.997	0.998	0.998	0.997	0.997	0.997	0.997	0.997	0.997	0.997	0.998
Sequence Difference Count Matrix
PA-nt	3306-2	3306-1	25338-2	23609	23608	23608-1K	25338-1	20689-27T	20689-28T	25690	22380	2968	8028-1	8028-2	18520-2	18520-1	63	21312	23404	23404-2T	23404-4K	23404-2K	23404-4T	2755	25702-2	22477-2	25827-3	25827-2	25827-1	22477-1	22684	61-1	61-2	785	22224-4T	22224-3K	23589-3	23589-4	23589-1T	22224-2T	22224-3T	23458-1K	22750	22608-1T	22608-2T	22608-3T	22608-1	22608-2	23589-1T
3306-2	ID	0	29	29	28	28	28	85	85	106	97	88	93	93	97	97	95	95	102	101	101	101	101	101	99	98	98	98	98	98	98	99	99	97	96	95	95	95	96	95	95	98	98	97	97	97	97	97	95
3306-1	0	ID	29	29	28	28	28	85	85	106	97	88	93	93	97	97	95	95	102	101	101	101	101	101	99	98	98	98	98	98	98	99	99	97	96	95	95	95	96	95	95	98	98	97	97	97	97	97	95
25338-2	29	29	ID	2	1	1	1	90	90	111	102	93	98	96	102	102	100	100	107	106	106	106	106	108	106	105	105	105	105	105	105	104	104	102	101	100	100	100	101	100	100	103	103	102	102	102	102	102	100
23609	29	29	2	ID	1	1	1	90	90	111	102	93	98	96	102	102	100	100	105	106	106	106	106	108	106	105	105	105	105	105	105	104	104	102	101	100	100	100	101	100	100	103	103	102	102	102	102	102	100
23608	28	28	1	1	ID	0	0	89	89	110	101	92	97	95	101	101	99	99	106	105	105	105	105	107	105	104	104	104	104	104	104	103	103	101	100	99	99	99	100	99	99	102	102	101	101	101	101	101	99
23608-1K	28	28	1	1	0	ID	0	89	89	110	101	92	97	95	101	101	99	99	106	105	105	105	105	107	105	104	104	104	104	104	104	103	103	101	100	99	99	99	100	99	99	102	102	101	101	101	101	101	99
25338-1	28	28	1	1	0	0	ID	89	89	110	101	92	97	95	101	101	99	99	106	105	105	105	105	107	105	104	104	104	104	104	104	103	103	101	100	99	99	99	100	99	99	102	102	101	101	101	101	101	99
20689-27T	85	85	90	90	89	89	89	ID	0	88	79	69	74	70	78	78	76	74	81	80	80	80	80	82	80	79	79	79	79	79	79	78	78	76	75	74	74	74	75	74	74	78	77	76	76	76	76	76	74
20689-28T	85	85	90	90	89	89	89	0	ID	88	79	69	74	70	78	78	76	74	81	80	80	80	80	82	80	79	79	79	79	79	79	78	78	76	75	74	74	74	75	74	74	78	77	76	76	76	76	76	74
25690	106	106	111	111	110	110	110	88	88	ID	12	48	53	51	58	58	61	57	64	63	63	63	63	65	63	62	62	62	62	62	62	61	61	59	58	57	57	57	58	57	57	61	60	59	59	59	59	59	57
22380	97	97	102	102	101	101	101	79	79	12	ID	40	45	43	50	50	53	49	56	55	55	55	55	57	55	54	54	54	54	54	54	53	53	51	50	49	49	49	50	49	49	53	52	51	51	51	51	51	49
2968	88	88	93	93	92	92	92	69	69	48	40	ID	5	5	38	38	37	35	42	41	41	41	41	41	39	38	38	38	38	38	38	39	39	37	36	35	35	35	37	35	35	39	38	37	37	37	37	37	35
8028-1	93	93	98	98	97	97	97	74	74	53	45	5	ID	4	43	43	42	40	47	46	46	46	46	46	44	43	43	43	43	43	43	44	44	42	41	40	40	40	42	40	40	43	41	42	42	42	42	42	40
8028-2	93	93	96	96	95	95	95	70	70	51	43	5	4	ID	41	41	40	38	45	44	44	44	44	46	44	43	43	43	43	43	43	42	42	40	39	38	38	38	40	38	38	41	39	40	40	40	40	40	38
18520-2	97	97	102	102	101	101	101	78	78	58	50	38	43	41	ID	2	31	27	33	32	32	32	32	37	35	34	34	34	34	34	34	31	31	29	28	27	27	27	29	27	27	31	30	29	29	29	29	29	27
18520-1	97	97	102	102	101	101	101	78	78	58	50	38	43	41	2	ID	31	27	33	32	32	32	32	37	35	34	34	34	34	34	34	31	31	29	28	27	27	27	29	27	27	31	30	29	29	29	29	29	27
63	95	95	100	100	99	99	99	76	76	61	53	37	42	40	31	31	ID	6	13	12	12	12	12	16	14	13	13	13	13	13	13	14	14	12	11	10	10	10	12	10	10	14	13	12	12	12	12	12	10
21312	95	95	100	100	99	99	99	74	74	57	49	35	40	38	27	27	6	ID	7	6	6	6	6	10	8	7	7	7	7	7	7	10	10	8	7	6	6	6	8	6	6	10	9	8	8	8	8	8	6
23404	102	102	107	105	106	106	106	81	81	64	56	42	47	45	33	33	13	7	ID	1	1	1	1	9	7	6	6	6	6	6	6	17	17	15	14	13	13	13	15	13	13	17	16	15	15	15	15	15	13
23404-2T	101	101	106	106	105	105	105	80	80	63	55	41	46	44	32	32	12	6	1	ID	0	0	0	8	6	5	5	5	5	5	5	16	16	14	13	12	12	12	14	12	12	16	15	14	14	14	14	14	12
23404-4K	101	101	106	106	105	105	105	80	80	63	55	41	46	44	32	32	12	6	1	0	ID	0	0	8	6	5	5	5	5	5	5	16	16	14	13	12	12	12	14	12	12	16	15	14	14	14	14	14	12
23404-2K	101	101	106	106	105	105	105	80	80	63	55	41	46	44	32	32	12	6	1	0	0	ID	0	8	6	5	5	5	5	5	5	16	16	14	13	12	12	12	14	12	12	16	15	14	14	14	14	14	12
23404-4T	101	101	106	106	105	105	105	80	80	63	55	41	46	44	32	32	12	6	1	0	0	0	ID	8	6	5	5	5	5	5	5	16	16	14	13	12	12	12	14	12	12	16	15	14	14	14	14	14	12
2755	101	101	108	108	107	107	107	82	82	65	57	41	46	46	37	37	16	10	9	8	8	8	8	ID	4	3	3	3	3	3	3	20	20	18	17	16	16	16	18	16	16	20	19	18	18	18	18	18	16
25702-2	99	99	106	106	105	105	105	80	80	63	55	39	44	44	35	35	14	8	7	6	6	6	6	4	ID	1	1	1	1	1	1	18	18	16	15	14	14	14	16	14	14	18	17	16	16	16	16	16	14
22477-2	98	98	105	105	104	104	104	79	79	62	54	38	43	43	34	34	13	7	6	5	5	5	5	3	1	ID	0	0	0	0	0	17	17	15	14	13	13	13	15	13	13	17	16	15	15	15	15	15	13
25827-3	98	98	105	105	104	104	104	79	79	62	54	38	43	43	34	34	13	7	6	5	5	5	5	3	1	0	ID	0	0	0	0	17	17	15	14	13	13	13	15	13	13	17	16	15	15	15	15	15	13
25827-2	98	98	105	105	104	104	104	79	79	62	54	38	43	43	34	34	13	7	6	5	5	5	5	3	1	0	0	ID	0	0	0	17	17	15	14	13	13	13	15	13	13	17	16	15	15	15	15	15	13
25827-1	98	98	105	105	104	104	104	79	79	62	54	38	43	43	34	34	13	7	6	5	5	5	5	3	1	0	0	0	ID	0	0	17	17	15	14	13	13	13	15	13	13	17	16	15	15	15	15	15	13
22477-1	98	98	105	105	104	104	104	79	79	62	54	38	43	43	34	34	13	7	6	5	5	5	5	3	1	0	0	0	0	ID	0	17	17	15	14	13	13	13	15	13	13	17	16	15	15	15	15	15	13
22684	98	98	105	105	104	104	104	79	79	62	54	38	43	43	34	34	13	7	6	5	5	5	5	3	1	0	0	0	0	0	ID	17	17	15	14	13	13	13	15	13	13	17	16	15	15	15	15	15	13
61-1	99	99	104	104	103	103	103	78	78	61	53	39	44	42	31	31	14	10	17	16	16	16	16	20	18	17	17	17	17	17	17	ID	0	10	9	8	8	8	10	8	8	12	11	10	10	10	10	10	8
61-2	99	99	104	104	103	103	103	78	78	61	53	39	44	42	31	31	14	10	17	16	16	16	16	20	18	17	17	17	17	17	17	0	ID	10	9	8	8	8	10	8	8	12	11	10	10	10	10	10	8
785	97	97	102	102	101	101	101	76	76	59	51	37	42	40	29	29	12	8	15	14	14	14	14	18	16	15	15	15	15	15	15	10	10	ID	3	2	2	2	4	2	2	6	5	4	4	4	4	4	2
22224-4T	96	96	101	101	100	100	100	75	75	58	50	36	41	39	28	28	11	7	14	13	13	13	13	17	15	14	14	14	14	14	14	9	9	3	ID	1	1	1	3	1	1	5	4	3	3	3	3	3	1
22224-3K	95	95	100	100	99	99	99	74	74	57	49	35	40	38	27	27	10	6	13	12	12	12	12	16	14	13	13	13	13	13	13	8	8	2	1	ID	0	0	2	0	0	4	3	2	2	2	2	2	0
23589-3	95	95	100	100	99	99	99	74	74	57	49	35	40	38	27	27	10	6	13	12	12	12	12	16	14	13	13	13	13	13	13	8	8	2	1	0	ID	0	2	0	0	4	3	2	2	2	2	2	0
23589-4	95	95	100	100	99	99	99	74	74	57	49	35	40	38	27	27	10	6	13	12	12	12	12	16	14	13	13	13	13	13	13	8	8	2	1	0	0	ID	2	0	0	4	3	2	2	2	2	2	0
23589-1T	96	96	101	101	100	100	100	75	75	58	50	37	42	40	29	29	12	8	15	14	14	14	14	18	16	15	15	15	15	15	15	10	10	4	3	2	2	2	ID	2	2	6	5	4	4	4	4	4	2
22224-2T	95	95	100	100	99	99	99	74	74	57	49	35	40	38	27	27	10	6	13	12	12	12	12	16	14	13	13	13	13	13	13	8	8	2	1	0	0	0	2	ID	0	4	3	2	2	2	2	2	0
22224-3T	95	95	100	100	99	99	99	74	74	57	49	35	40	38	27	27	10	6	13	12	12	12	12	16	14	13	13	13	13	13	13	8	8	2	1	0	0	0	2	0	ID	4	3	2	2	2	2	2	0
23458-1K	98	98	103	103	102	102	102	78	78	61	53	39	43	41	31	31	14	10	17	16	16	16	16	20	18	17	17	17	17	17	17	12	12	6	5	4	4	4	6	4	4	ID	4	4	4	4	4	4	4
22750	98	98	103	103	102	102	102	77	77	60	52	38	41	39	30	30	13	9	16	15	15	15	15	19	17	16	16	16	16	16	16	11	11	5	4	3	3	3	5	3	3	4	ID	1	1	1	1	1	3
22608-1T	97	97	102	102	101	101	101	76	76	59	51	37	42	40	29	29	12	8	15	14	14	14	14	18	16	15	15	15	15	15	15	10	10	4	3	2	2	2	4	2	2	4	1	ID	0	0	0	0	2
22608-2T	97	97	102	102	101	101	101	76	76	59	51	37	42	40	29	29	12	8	15	14	14	14	14	18	16	15	15	15	15	15	15	10	10	4	3	2	2	2	4	2	2	4	1	0	ID	0	0	0	2
22608-3T	97	97	102	102	101	101	101	76	76	59	51	37	42	40	29	29	12	8	15	14	14	14	14	18	16	15	15	15	15	15	15	10	10	4	3	2	2	2	4	2	2	4	1	0	0	ID	0	0	2
22608-1	97	97	102	102	101	101	101	76	76	59	51	37	42	40	29	29	12	8	15	14	14	14	14	18	16	15	15	15	15	15	15	10	10	4	3	2	2	2	4	2	2	4	1	0	0	0	ID	0	2
22608-2	97	97	102	102	101	101	101	76	76	59	51	37	42	40	29	29	12	8	15	14	14	14	14	18	16	15	15	15	15	15	15	10	10	4	3	2	2	2	4	2	2	4	1	0	0	0	0	ID	2
23589-1T	95	95	100	100	99	99	99	74	74	57	49	35	40	38	27	27	10	6	13	12	12	12	12	16	14	13	13	13	13	13	13	8	8	2	1	0	0	0	2	0	0	4	3	2	2	2	2	2	ID
913	96	96	101	101	100	100	100	75	75	58	50	36	41	39	28	28	11	7	14	13	13	13	13	17	15	14	14	14	14	14	14	9	9	1	2	1	1	1	3	1	1	5	4	3	3	3	3	3	1
913	96	96	101	101	100	100	100	75	75	58	50	36	41	39	28	28	11	7	14	13	13	13	13	17	15	14	14	14	14	14	14	9	9	1	2	1	1	1	3	1	1	5	4	3	3	3	3	3	1
913	97	97	102	102	101	101	101	76	76	60	52	38	43	41	30	30	13	9	16	15	15	15	15	19	17	16	16	16	16	16	16	11	11	1	4	3	3	3	5	3	3	7	6	5	5	5	5	5	3
785	95	95	100	100	99	99	99	76	76	60	52	38	43	41	30	30	13	9	16	15	15	15	15	19	17	16	16	16	16	16	16	11	11	9	8	7	7	7	9	7	7	11	10	9	9	9	9	9	7
23458-4T	94	94	99	99	98	98	98	75	75	58	50	36	41	39	28	28	11	7	14	13	13	13	13	17	15	14	14	14	14	14	14	9	9	3	2	1	1	1	3	1	1	4	4	3	3	3	3	3	1
23458-2T	94	94	99	99	98	98	98	75	75	58	50	36	41	39	28	28	11	7	14	13	13	13	13	17	15	14	14	14	14	14	14	9	9	3	2	1	1	1	3	1	1	4	4	3	3	3	3	3	1
23458-5T	94	94	99	99	98	98	98	75	75	58	50	36	41	39	28	28	11	7	14	13	13	13	13	17	15	14	14	14	14	14	14	9	9	3	2	1	1	1	3	1	1	4	4	3	3	3	3	3	1
25322-229	96	96	101	101	100	100	100	77	77	60	52	36	41	39	30	30	13	9	16	15	15	15	15	19	17	16	16	16	16	16	16	11	11	5	4	3	3	3	5	3	3	6	6	5	5	5	5	5	3
25322-179	95	95	100	100	99	99	99	76	76	59	51	35	40	38	29	29	12	8	15	14	14	14	14	18	16	15	15	15	15	15	15	10	10	4	3	2	2	2	4	2	2	5	5	4	4	4	4	4	2
25322-205	96	96	101	101	100	100	100	77	77	60	52	36	41	39	30	30	13	9	16	15	15	15	15	19	17	16	16	16	16	16	16	11	11	5	4	3	3	3	5	3	3	6	6	5	5	5	5	5	3
[truncated: 70 more columns]

## Sheet: H5
Sequence Identity Matrix
H5-nt	20689-27T	20689-28T	18520-1	18520-2	25690	22380	2968	8028-1	8028-2	63	23609	23608-1K	23608	25338-1	25338-2	21312	23404-2K	23404-2T	23404-4K	23404-4T	23404	3306-1	3306-2	22477-1	22477-2	25702-2	22684	2755	25827-1	25827-2	25827-3	61-1	61-2	785	785	22224-2T	25322-179	25322-205	25322-229	22224-3K	22224-3T	22224-4T	23589-1T	23589-3	23589-1T	23589-4	23458-1K	23458-2T	23458-4T
20689-27T	ID	1	0.851	0.85	0.851	0.853	0.848	0.851	0.851	0.853	0.85	0.851	0.851	0.851	0.851	0.851	0.851	0.851	0.851	0.851	0.851	0.85	0.851	0.851	0.851	0.851	0.851	0.851	0.851	0.851	0.851	0.852	0.853	0.853	0.854	0.853	0.851	0.853	0.853	0.854	0.854	0.854	0.854	0.854	0.854	0.854	0.854	0.854	0.854
20689-28T	1	ID	0.851	0.85	0.851	0.853	0.848	0.851	0.851	0.853	0.85	0.851	0.851	0.851	0.851	0.851	0.851	0.851	0.851	0.851	0.851	0.85	0.851	0.851	0.851	0.851	0.851	0.851	0.851	0.851	0.851	0.852	0.853	0.853	0.854	0.853	0.851	0.853	0.853	0.854	0.854	0.854	0.854	0.854	0.854	0.854	0.854	0.854	0.854
18520-1	0.851	0.851	ID	0.998	0.99	0.989	0.989	0.988	0.988	0.99	0.99	0.99	0.99	0.99	0.99	0.991	0.99	0.99	0.99	0.99	0.99	0.99	0.99	0.991	0.991	0.991	0.991	0.99	0.99	0.99	0.99	0.993	0.992	0.991	0.991	0.991	0.991	0.993	0.993	0.992	0.992	0.992	0.992	0.992	0.992	0.992	0.991	0.992	0.992
18520-2	0.85	0.85	0.998	ID	0.989	0.988	0.987	0.987	0.987	0.989	0.99	0.989	0.989	0.989	0.989	0.991	0.989	0.989	0.989	0.989	0.989	0.989	0.989	0.99	0.99	0.99	0.99	0.989	0.989	0.989	0.989	0.991	0.991	0.99	0.99	0.99	0.99	0.991	0.991	0.991	0.991	0.991	0.991	0.991	0.991	0.991	0.99	0.991	0.991
25690	0.851	0.851	0.99	0.989	ID	0.994	0.987	0.99	0.99	0.992	0.992	0.993	0.993	0.993	0.993	0.993	0.993	0.993	0.992	0.992	0.992	0.992	0.993	0.993	0.993	0.993	0.993	0.992	0.993	0.993	0.993	0.995	0.994	0.994	0.994	0.994	0.993	0.995	0.995	0.994	0.994	0.994	0.994	0.994	0.994	0.994	0.993	0.994	0.994
22380	0.853	0.853	0.989	0.988	0.994	ID	0.986	0.989	0.989	0.991	0.991	0.991	0.991	0.991	0.991	0.991	0.991	0.991	0.991	0.991	0.991	0.991	0.991	0.992	0.992	0.992	0.992	0.991	0.991	0.991	0.991	0.994	0.993	0.993	0.993	0.993	0.992	0.994	0.994	0.993	0.993	0.993	0.993	0.993	0.993	0.993	0.992	0.993	0.993
2968	0.848	0.848	0.989	0.987	0.987	0.986	ID	0.992	0.992	0.99	0.99	0.991	0.991	0.991	0.991	0.991	0.991	0.991	0.99	0.99	0.99	0.989	0.99	0.991	0.991	0.991	0.991	0.99	0.991	0.991	0.991	0.99	0.989	0.989	0.989	0.989	0.988	0.99	0.99	0.989	0.989	0.989	0.989	0.989	0.989	0.989	0.988	0.989	0.989
8028-1	0.851	0.851	0.988	0.987	0.99	0.989	0.992	ID	1	0.994	0.993	0.994	0.994	0.994	0.994	0.994	0.994	0.994	0.993	0.993	0.993	0.992	0.993	0.994	0.994	0.994	0.994	0.993	0.994	0.994	0.994	0.993	0.992	0.991	0.991	0.991	0.991	0.993	0.993	0.992	0.992	0.992	0.992	0.992	0.992	0.992	0.991	0.992	0.992
8028-2	0.851	0.851	0.988	0.987	0.99	0.989	0.992	1	ID	0.994	0.993	0.994	0.994	0.994	0.994	0.994	0.994	0.994	0.993	0.993	0.993	0.992	0.993	0.994	0.994	0.994	0.994	0.993	0.994	0.994	0.994	0.993	0.992	0.991	0.991	0.991	0.991	0.993	0.993	0.992	0.992	0.992	0.992	0.992	0.992	0.992	0.991	0.992	0.992
63	0.853	0.853	0.99	0.989	0.992	0.991	0.99	0.994	0.994	ID	0.995	0.995	0.995	0.995	0.995	0.995	0.995	0.995	0.995	0.995	0.995	0.994	0.994	0.996	0.996	0.996	0.996	0.995	0.995	0.995	0.995	0.994	0.994	0.993	0.993	0.993	0.993	0.994	0.994	0.994	0.994	0.994	0.994	0.994	0.994	0.994	0.993	0.994	0.994
23609	0.85	0.85	0.99	0.99	0.992	0.991	0.99	0.993	0.993	0.995	ID	0.999	0.999	0.999	0.999	0.995	0.995	0.995	0.995	0.995	0.995	0.994	0.994	0.996	0.996	0.996	0.996	0.995	0.995	0.995	0.995	0.994	0.994	0.993	0.993	0.993	0.993	0.994	0.994	0.994	0.994	0.994	0.994	0.994	0.994	0.994	0.993	0.994	0.994
23608-1K	0.851	0.851	0.99	0.989	0.993	0.991	0.991	0.994	0.994	0.995	0.999	ID	1	1	1	0.996	0.996	0.996	0.995	0.995	0.995	0.994	0.995	0.997	0.997	0.997	0.997	0.995	0.996	0.996	0.996	0.995	0.994	0.994	0.994	0.994	0.993	0.995	0.995	0.994	0.994	0.994	0.994	0.994	0.994	0.994	0.993	0.994	0.994
23608	0.851	0.851	0.99	0.989	0.993	0.991	0.991	0.994	0.994	0.995	0.999	1	ID	1	1	0.996	0.996	0.996	0.995	0.995	0.995	0.994	0.995	0.997	0.997	0.997	0.997	0.995	0.996	0.996	0.996	0.995	0.994	0.994	0.994	0.994	0.993	0.995	0.995	0.994	0.994	0.994	0.994	0.994	0.994	0.994	0.993	0.994	0.994
25338-1	0.851	0.851	0.99	0.989	0.993	0.991	0.991	0.994	0.994	0.995	0.999	1	1	ID	1	0.996	0.996	0.996	0.995	0.995	0.995	0.994	0.995	0.997	0.997	0.997	0.997	0.995	0.996	0.996	0.996	0.995	0.994	0.994	0.994	0.994	0.993	0.995	0.995	0.994	0.994	0.994	0.994	0.994	0.994	0.994	0.993	0.994	0.994
25338-2	0.851	0.851	0.99	0.989	0.993	0.991	0.991	0.994	0.994	0.995	0.999	1	1	1	ID	0.996	0.996	0.996	0.995	0.995	0.995	0.994	0.995	0.997	0.997	0.997	0.997	0.995	0.996	0.996	0.996	0.995	0.994	0.994	0.994	0.994	0.993	0.995	0.995	0.994	0.994	0.994	0.994	0.994	0.994	0.994	0.993	0.994	0.994
21312	0.851	0.851	0.991	0.991	0.993	0.991	0.991	0.994	0.994	0.995	0.995	0.996	0.996	0.996	0.996	ID	0.996	0.996	0.995	0.995	0.995	0.994	0.995	0.997	0.997	0.997	0.997	0.995	0.996	0.996	0.996	0.995	0.994	0.994	0.994	0.994	0.993	0.995	0.995	0.994	0.994	0.994	0.994	0.994	0.994	0.994	0.993	0.994	0.994
23404-2K	0.851	0.851	0.99	0.989	0.993	0.991	0.991	0.994	0.994	0.995	0.995	0.996	0.996	0.996	0.996	0.996	ID	1	0.999	0.999	0.999	0.995	0.996	0.998	0.998	0.998	0.998	0.997	0.997	0.997	0.997	0.995	0.994	0.994	0.994	0.994	0.993	0.995	0.995	0.994	0.994	0.994	0.994	0.994	0.994	0.994	0.993	0.994	0.994
23404-2T	0.851	0.851	0.99	0.989	0.993	0.991	0.991	0.994	0.994	0.995	0.995	0.996	0.996	0.996	0.996	0.996	1	ID	0.999	0.999	0.999	0.995	0.996	0.998	0.998	0.998	0.998	0.997	0.997	0.997	0.997	0.995	0.994	0.994	0.994	0.994	0.993	0.995	0.995	0.994	0.994	0.994	0.994	0.994	0.994	0.994	0.993	0.994	0.994
23404-4K	0.851	0.851	0.99	0.989	0.992	0.991	0.99	0.993	0.993	0.995	0.995	0.995	0.995	0.995	0.995	0.995	0.999	0.999	ID	1	0.999	0.995	0.995	0.997	0.997	0.997	0.997	0.996	0.997	0.997	0.997	0.994	0.994	0.993	0.993	0.993	0.993	0.994	0.994	0.994	0.994	0.994	0.994	0.994	0.994	0.994	0.993	0.994	0.994
23404-4T	0.851	0.851	0.99	0.989	0.992	0.991	0.99	0.993	0.993	0.995	0.995	0.995	0.995	0.995	0.995	0.995	0.999	0.999	1	ID	0.999	0.995	0.995	0.997	0.997	0.997	0.997	0.996	0.997	0.997	0.997	0.994	0.994	0.993	0.993	0.993	0.993	0.994	0.994	0.994	0.994	0.994	0.994	0.994	0.994	0.994	0.993	0.994	0.994
23404	0.851	0.851	0.99	0.989	0.992	0.991	0.99	0.993	0.993	0.995	0.995	0.995	0.995	0.995	0.995	0.995	0.999	0.999	0.999	0.999	ID	0.995	0.995	0.997	0.997	0.997	0.997	0.996	0.997	0.997	0.997	0.994	0.994	0.993	0.993	0.993	0.993	0.994	0.994	0.994	0.994	0.994	0.994	0.994	0.994	0.994	0.993	0.994	0.994
3306-1	0.85	0.85	0.99	0.989	0.992	0.991	0.989	0.992	0.992	0.994	0.994	0.994	0.994	0.994	0.994	0.994	0.995	0.995	0.995	0.995	0.995	ID	0.999	0.996	0.996	0.996	0.996	0.995	0.995	0.995	0.995	0.994	0.994	0.993	0.993	0.993	0.993	0.994	0.994	0.994	0.994	0.994	0.994	0.994	0.994	0.994	0.993	0.994	0.994
3306-2	0.851	0.851	0.99	0.989	0.993	0.991	0.99	0.993	0.993	0.994	0.994	0.995	0.995	0.995	0.995	0.995	0.996	0.996	0.995	0.995	0.995	0.999	ID	0.997	0.997	0.997	0.997	0.995	0.996	0.996	0.996	0.995	0.994	0.994	0.994	0.994	0.993	0.995	0.995	0.994	0.994	0.994	0.994	0.994	0.994	0.994	0.993	0.994	0.994
22477-1	0.851	0.851	0.991	0.99	0.993	0.992	0.991	0.994	0.994	0.996	0.996	0.997	0.997	0.997	0.997	0.997	0.998	0.998	0.997	0.997	0.997	0.996	0.997	ID	1	1	1	0.998	0.999	0.999	0.999	0.995	0.995	0.994	0.994	0.994	0.994	0.995	0.995	0.995	0.995	0.995	0.995	0.995	0.995	0.995	0.994	0.995	0.995
22477-2	0.851	0.851	0.991	0.99	0.993	0.992	0.991	0.994	0.994	0.996	0.996	0.997	0.997	0.997	0.997	0.997	0.998	0.998	0.997	0.997	0.997	0.996	0.997	1	ID	1	1	0.998	0.999	0.999	0.999	0.995	0.995	0.994	0.994	0.994	0.994	0.995	0.995	0.995	0.995	0.995	0.995	0.995	0.995	0.995	0.994	0.995	0.995
25702-2	0.851	0.851	0.991	0.99	0.993	0.992	0.991	0.994	0.994	0.996	0.996	0.997	0.997	0.997	0.997	0.997	0.998	0.998	0.997	0.997	0.997	0.996	0.997	1	1	ID	1	0.998	0.999	0.999	0.999	0.995	0.995	0.994	0.994	0.994	0.994	0.995	0.995	0.995	0.995	0.995	0.995	0.995	0.995	0.995	0.994	0.995	0.995
22684	0.851	0.851	0.991	0.99	0.993	0.992	0.991	0.994	0.994	0.996	0.996	0.997	0.997	0.997	0.997	0.997	0.998	0.998	0.997	0.997	0.997	0.996	0.997	1	1	1	ID	0.998	0.999	0.999	0.999	0.995	0.995	0.994	0.994	0.994	0.994	0.995	0.995	0.995	0.995	0.995	0.995	0.995	0.995	0.995	0.994	0.995	0.995
2755	0.851	0.851	0.99	0.989	0.992	0.991	0.99	0.993	0.993	0.995	0.995	0.995	0.995	0.995	0.995	0.995	0.997	0.997	0.996	0.996	0.996	0.995	0.995	0.998	0.998	0.998	0.998	ID	0.998	0.998	0.998	0.994	0.994	0.993	0.993	0.993	0.993	0.994	0.994	0.994	0.994	0.994	0.994	0.994	0.994	0.994	0.993	0.994	0.994
25827-1	0.851	0.851	0.99	0.989	0.993	0.991	0.991	0.994	0.994	0.995	0.995	0.996	0.996	0.996	0.996	0.996	0.997	0.997	0.997	0.997	0.997	0.995	0.996	0.999	0.999	0.999	0.999	0.998	ID	1	1	0.995	0.994	0.994	0.994	0.994	0.993	0.995	0.995	0.994	0.994	0.994	0.994	0.994	0.994	0.994	0.993	0.994	0.994
25827-2	0.851	0.851	0.99	0.989	0.993	0.991	0.991	0.994	0.994	0.995	0.995	0.996	0.996	0.996	0.996	0.996	0.997	0.997	0.997	0.997	0.997	0.995	0.996	0.999	0.999	0.999	0.999	0.998	1	ID	1	0.995	0.994	0.994	0.994	0.994	0.993	0.995	0.995	0.994	0.994	0.994	0.994	0.994	0.994	0.994	0.993	0.994	0.994
25827-3	0.851	0.851	0.99	0.989	0.993	0.991	0.991	0.994	0.994	0.995	0.995	0.996	0.996	0.996	0.996	0.996	0.997	0.997	0.997	0.997	0.997	0.995	0.996	0.999	0.999	0.999	0.999	0.998	1	1	ID	0.995	0.994	0.994	0.994	0.994	0.993	0.995	0.995	0.994	0.994	0.994	0.994	0.994	0.994	0.994	0.993	0.994	0.994
61-1	0.852	0.852	0.993	0.991	0.995	0.994	0.99	0.993	0.993	0.994	0.994	0.995	0.995	0.995	0.995	0.995	0.995	0.995	0.994	0.994	0.994	0.994	0.995	0.995	0.995	0.995	0.995	0.994	0.995	0.995	0.995	ID	0.999	0.997	0.997	0.997	0.997	0.998	0.998	0.998	0.998	0.998	0.998	0.998	0.998	0.998	0.997	0.998	0.998
61-2	0.853	0.853	0.992	0.991	0.994	0.993	0.989	0.992	0.992	0.994	0.994	0.994	0.994	0.994	0.994	0.994	0.994	0.994	0.994	0.994	0.994	0.994	0.994	0.995	0.995	0.995	0.995	0.994	0.994	0.994	0.994	0.999	ID	0.997	0.997	0.997	0.996	0.998	0.998	0.997	0.997	0.997	0.997	0.997	0.997	0.997	0.996	0.997	0.997
785	0.853	0.853	0.991	0.99	0.994	0.993	0.989	0.991	0.991	0.993	0.993	0.994	0.994	0.994	0.994	0.994	0.994	0.994	0.993	0.993	0.993	0.993	0.994	0.994	0.994	0.994	0.994	0.993	0.994	0.994	0.994	0.997	0.997	ID	0.997	0.997	0.997	0.998	0.998	0.998	0.998	0.998	0.998	0.998	0.998	0.998	0.997	0.998	0.998
785	0.854	0.854	0.991	0.99	0.994	0.993	0.989	0.991	0.991	0.993	0.993	0.994	0.994	0.994	0.994	0.994	0.994	0.994	0.993	0.993	0.993	0.993	0.994	0.994	0.994	0.994	0.994	0.993	0.994	0.994	0.994	0.997	0.997	0.997	ID	0.997	0.997	0.998	0.998	0.998	0.998	0.998	0.998	0.998	0.998	0.998	0.997	0.998	0.998
22224-2T	0.853	0.853	0.991	0.99	0.994	0.993	0.989	0.991	0.991	0.993	0.993	0.994	0.994	0.994	0.994	0.994	0.994	0.994	0.993	0.993	0.993	0.993	0.994	0.994	0.994	0.994	0.994	0.993	0.994	0.994	0.994	0.997	0.997	0.997	0.997	ID	0.997	0.998	0.998	0.999	0.999	0.999	0.999	0.999	0.999	0.999	0.997	0.998	0.998
25322-179	0.851	0.851	0.991	0.99	0.993	0.992	0.988	0.991	0.991	0.993	0.993	0.993	0.993	0.993	0.993	0.993	0.993	0.993	0.993	0.993	0.993	0.993	0.993	0.994	0.994	0.994	0.994	0.993	0.993	0.993	0.993	0.997	0.996	0.997	0.997	0.997	ID	0.998	0.998	0.997	0.997	0.997	0.997	0.997	0.997	0.997	0.996	0.997	0.997
25322-205	0.853	0.853	0.993	0.991	0.995	0.994	0.99	0.993	0.993	0.994	0.994	0.995	0.995	0.995	0.995	0.995	0.995	0.995	0.994	0.994	0.994	0.994	0.995	0.995	0.995	0.995	0.995	0.994	0.995	0.995	0.995	0.998	0.998	0.998	0.998	0.998	0.998	ID	1	0.999	0.999	0.999	0.999	0.999	0.999	0.999	0.998	0.999	0.999
25322-229	0.853	0.853	0.993	0.991	0.995	0.994	0.99	0.993	0.993	0.994	0.994	0.995	0.995	0.995	0.995	0.995	0.995	0.995	0.994	0.994	0.994	0.994	0.995	0.995	0.995	0.995	0.995	0.994	0.995	0.995	0.995	0.998	0.998	0.998	0.998	0.998	0.998	1	ID	0.999	0.999	0.999	0.999	0.999	0.999	0.999	0.998	0.999	0.999
22224-3K	0.854	0.854	0.992	0.991	0.994	0.993	0.989	0.992	0.992	0.994	0.994	0.994	0.994	0.994	0.994	0.994	0.994	0.994	0.994	0.994	0.994	0.994	0.994	0.995	0.995	0.995	0.995	0.994	0.994	0.994	0.994	0.998	0.997	0.998	0.998	0.999	0.997	0.999	0.999	ID	1	1	1	1	1	1	0.997	0.998	0.998
22224-3T	0.854	0.854	0.992	0.991	0.994	0.993	0.989	0.992	0.992	0.994	0.994	0.994	0.994	0.994	0.994	0.994	0.994	0.994	0.994	0.994	0.994	0.994	0.994	0.995	0.995	0.995	0.995	0.994	0.994	0.994	0.994	0.998	0.997	0.998	0.998	0.999	0.997	0.999	0.999	1	ID	1	1	1	1	1	0.997	0.998	0.998
22224-4T	0.854	0.854	0.992	0.991	0.994	0.993	0.989	0.992	0.992	0.994	0.994	0.994	0.994	0.994	0.994	0.994	0.994	0.994	0.994	0.994	0.994	0.994	0.994	0.995	0.995	0.995	0.995	0.994	0.994	0.994	0.994	0.998	0.997	0.998	0.998	0.999	0.997	0.999	0.999	1	1	ID	1	1	1	1	0.997	0.998	0.998
23589-1T	0.854	0.854	0.992	0.991	0.994	0.993	0.989	0.992	0.992	0.994	0.994	0.994	0.994	0.994	0.994	0.994	0.994	0.994	0.994	0.994	0.994	0.994	0.994	0.995	0.995	0.995	0.995	0.994	0.994	0.994	0.994	0.998	0.997	0.998	0.998	0.999	0.997	0.999	0.999	1	1	1	ID	1	1	1	0.997	0.998	0.998
23589-3	0.854	0.854	0.992	0.991	0.994	0.993	0.989	0.992	0.992	0.994	0.994	0.994	0.994	0.994	0.994	0.994	0.994	0.994	0.994	0.994	0.994	0.994	0.994	0.995	0.995	0.995	0.995	0.994	0.994	0.994	0.994	0.998	0.997	0.998	0.998	0.999	0.997	0.999	0.999	1	1	1	1	ID	1	1	0.997	0.998	0.998
23589-1T	0.854	0.854	0.992	0.991	0.994	0.993	0.989	0.992	0.992	0.994	0.994	0.994	0.994	0.994	0.994	0.994	0.994	0.994	0.994	0.994	0.994	0.994	0.994	0.995	0.995	0.995	0.995	0.994	0.994	0.994	0.994	0.998	0.997	0.998	0.998	0.999	0.997	0.999	0.999	1	1	1	1	1	ID	1	0.997	0.998	0.998
23589-4	0.854	0.854	0.992	0.991	0.994	0.993	0.989	0.992	0.992	0.994	0.994	0.994	0.994	0.994	0.994	0.994	0.994	0.994	0.994	0.994	0.994	0.994	0.994	0.995	0.995	0.995	0.995	0.994	0.994	0.994	0.994	0.998	0.997	0.998	0.998	0.999	0.997	0.999	0.999	1	1	1	1	1	1	ID	0.997	0.998	0.998
23458-1K	0.854	0.854	0.991	0.99	0.993	0.992	0.988	0.991	0.991	0.993	0.993	0.993	0.993	0.993	0.993	0.993	0.993	0.993	0.993	0.993	0.993	0.993	0.993	0.994	0.994	0.994	0.994	0.993	0.993	0.993	0.993	0.997	0.996	0.997	0.997	0.997	0.996	0.998	0.998	0.997	0.997	0.997	0.997	0.997	0.997	0.997	ID	0.998	0.998
23458-2T	0.854	0.854	0.992	0.991	0.994	0.993	0.989	0.992	0.992	0.994	0.994	0.994	0.994	0.994	0.994	0.994	0.994	0.994	0.994	0.994	0.994	0.994	0.994	0.995	0.995	0.995	0.995	0.994	0.994	0.994	0.994	0.998	0.997	0.998	0.998	0.998	0.997	0.999	0.999	0.998	0.998	0.998	0.998	0.998	0.998	0.998	0.998	ID	1
23458-4T	0.854	0.854	0.992	0.991	0.994	0.993	0.989	0.992	0.992	0.994	0.994	0.994	0.994	0.994	0.994	0.994	0.994	0.994	0.994	0.994	0.994	0.994	0.994	0.995	0.995	0.995	0.995	0.994	0.994	0.994	0.994	0.998	0.997	0.998	0.998	0.998	0.997	0.999	0.999	0.998	0.998	0.998	0.998	0.998	0.998	0.998	0.998	1	ID
23458-5T	0.854	0.854	0.992	0.991	0.994	0.993	0.989	0.992	0.992	0.994	0.994	0.994	0.994	0.994	0.994	0.994	0.994	0.994	0.994	0.994	0.994	0.994	0.994	0.995	0.995	0.995	0.995	0.994	0.994	0.994	0.994	0.998	0.997	0.998	0.998	0.998	0.997	0.999	0.999	0.998	0.998	0.998	0.998	0.998	0.998	0.998	0.998	1	1
913	0.853	0.853	0.991	0.99	0.994	0.993	0.989	0.991	0.991	0.993	0.993	0.994	0.994	0.994	0.994	0.994	0.994	0.994	0.993	0.993	0.993	0.993	0.994	0.994	0.994	0.994	0.994	0.993	0.994	0.994	0.994	0.997	0.997	1	0.997	0.997	0.997	0.998	0.998	0.998	0.998	0.998	0.998	0.998	0.998	0.998	0.997	0.998	0.998
913	0.853	0.853	0.991	0.99	0.994	0.993	0.989	0.991	0.991	0.993	0.993	0.994	0.994	0.994	0.994	0.994	0.994	0.994	0.993	0.993	0.993	0.993	0.994	0.994	0.994	0.994	0.994	0.993	0.994	0.994	0.994	0.997	0.997	1	0.997	0.997	0.997	0.998	0.998	0.998	0.998	0.998	0.998	0.998	0.998	0.998	0.997	0.998	0.998
913	0.853	0.853	0.991	0.99	0.994	0.993	0.989	0.991	0.991	0.993	0.993	0.994	0.994	0.994	0.994	0.994	0.994	0.994	0.993	0.993	0.993	0.993	0.994	0.994	0.994	0.994	0.994	0.993	0.994	0.994	0.994	0.997	0.997	1	0.997	0.997	0.997	0.998	0.998	0.998	0.998	0.998	0.998	0.998	0.998	0.998	0.997	0.998	0.998
22750	0.854	0.854	0.991	0.99	0.994	0.993	0.989	0.991	0.991	0.993	0.993	0.994	0.994	0.994	0.994	0.994	0.994	0.994	0.993	0.993	0.993	0.993	0.994	0.994	0.994	0.994	0.994	0.993	0.994	0.994	0.994	0.997	0.997	0.997	0.997	0.997	0.997	0.998	0.998	0.998	0.998	0.998	0.998	0.998	0.998	0.998	0.998	0.998	0.998
22608-1	0.854	0.854	0.992	0.991	0.994	0.993	0.989	0.992	0.992	0.994	0.994	0.994	0.994	0.994	0.994	0.994	0.994	0.994	0.994	0.994	0.994	0.994	0.994	0.995	0.995	0.995	0.995	0.994	0.994	0.994	0.994	0.998	0.997	0.998	0.998	0.998	0.997	0.999	0.999	0.998	0.998	0.998	0.998	0.998	0.998	0.998	0.998	0.998	0.998
22608-1T	0.854	0.854	0.992	0.991	0.994	0.993	0.989	0.992	0.992	0.994	0.994	0.994	0.994	0.994	0.994	0.994	0.994	0.994	0.994	0.994	0.994	0.994	0.994	0.995	0.995	0.995	0.995	0.994	0.994	0.994	0.994	0.998	0.997	0.998	0.998	0.998	0.997	0.999	0.999	0.998	0.998	0.998	0.998	0.998	0.998	0.998	0.998	0.998	0.998
22608-2	0.854	0.854	0.991	0.99	0.994	0.993	0.989	0.991	0.991	0.993	0.993	0.994	0.994	0.994	0.994	0.994	0.994	0.994	0.993	0.993	0.993	0.993	0.994	0.994	0.994	0.994	0.994	0.993	0.994	0.994	0.994	0.997	0.997	0.997	0.997	0.997	0.997	0.998	0.998	0.998	0.998	0.998	0.998	0.998	0.998	0.998	0.998	0.998	0.998
22608-2T	0.854	0.854	0.992	0.991	0.994	0.993	0.989	0.992	0.992	0.994	0.994	0.994	0.994	0.994	0.994	0.994	0.994	0.994	0.994	0.994	0.994	0.994	0.994	0.995	0.995	0.995	0.995	0.994	0.994	0.994	0.994	0.998	0.997	0.998	0.998	0.998	0.997	0.999	0.999	0.998	0.998	0.998	0.998	0.998	0.998	0.998	0.998	0.998	0.998
22608-3T	0.854	0.854	0.992	0.991	0.994	0.993	0.989	0.992	0.992	0.994	0.994	0.994	0.994	0.994	0.994	0.994	0.994	0.994	0.994	0.994	0.994	0.994	0.994	0.995	0.995	0.995	0.995	0.994	0.994	0.994	0.994	0.998	0.997	0.998	0.998	0.998	0.997	0.999	0.999	0.998	0.998	0.998	0.998	0.998	0.998	0.998	0.998	0.998	0.998
Sequence Difference Count Matrix
H5-nt	20689-27T	20689-28T	18520-1	18520-2	25690	22380	2968	8028-1	8028-2	63	23609	23608-1K	23608	25338-1	25338-2	21312	23404-2K	23404-2T	23404-4K	23404-4T	23404	3306-1	3306-2	22477-1	22477-2	25702-2	22684	2755	25827-1	25827-2	25827-3	61-1	61-2	785	785	22224-2T	25322-179	25322-205	25322-229	22224-3K	22224-3T	22224-4T	23589-1T	23589-3	23589-1T	23589-4	23458-1K	23458-2T	23458-4T
20689-27T	ID	0	257	259	256	253	261	256	256	254	258	257	257	257	257	257	257	257	256	256	257	258	257	256	256	256	256	256	257	257	257	255	254	253	251	253	256	253	253	252	252	252	252	252	252	252	252	252	252
20689-28T	0	ID	257	259	256	253	261	256	256	254	258	257	257	257	257	257	257	257	256	256	257	258	257	256	256	256	256	256	257	257	257	255	254	253	251	253	256	253	253	252	252	252	252	252	252	252	252	252	252
18520-1	257	257	ID	2	16	18	19	20	20	17	17	16	16	16	16	14	16	16	17	17	17	17	16	15	15	15	15	17	16	16	16	12	13	14	14	14	15	12	12	13	13	13	13	13	13	13	15	13	13
18520-2	259	259	2	ID	18	20	21	22	22	19	17	18	18	18	18	14	18	18	19	19	19	19	18	17	17	17	17	19	18	18	18	14	15	16	16	16	17	14	14	15	15	15	15	15	15	15	17	15	15
25690	256	256	16	18	ID	10	21	16	16	13	13	12	12	12	12	12	12	12	13	13	13	13	12	11	11	11	11	13	12	12	12	8	9	10	10	10	11	8	8	9	9	9	9	9	9	9	11	9	9
22380	253	253	18	20	10	ID	23	18	18	15	15	14	14	14	14	14	14	14	15	15	15	15	14	13	13	13	13	15	14	14	14	10	11	12	12	12	13	10	10	11	11	11	11	11	11	11	13	11	11
2968	261	261	19	21	21	23	ID	13	13	16	16	15	15	15	15	15	15	15	16	16	16	18	17	14	14	14	14	16	15	15	15	17	18	19	19	19	20	17	17	18	18	18	18	18	18	18	20	18	18
8028-1	256	256	20	22	16	18	13	ID	0	9	11	10	10	10	10	10	10	10	11	11	11	13	12	9	9	9	9	11	10	10	10	12	13	14	14	14	15	12	12	13	13	13	13	13	13	13	15	13	13
8028-2	256	256	20	22	16	18	13	0	ID	9	11	10	10	10	10	10	10	10	11	11	11	13	12	9	9	9	9	11	10	10	10	12	13	14	14	14	15	12	12	13	13	13	13	13	13	13	15	13	13
63	254	254	17	19	13	15	16	9	9	ID	8	7	7	7	7	7	7	7	8	8	8	10	9	6	6	6	6	8	7	7	7	9	10	11	11	11	12	9	9	10	10	10	10	10	10	10	12	10	10
23609	258	258	17	17	13	15	16	11	11	8	ID	1	1	1	1	7	7	7	8	8	8	10	9	6	6	6	6	8	7	7	7	9	10	11	11	11	12	9	9	10	10	10	10	10	10	10	12	10	10
23608-1K	257	257	16	18	12	14	15	10	10	7	1	ID	0	0	0	6	6	6	7	7	7	9	8	5	5	5	5	7	6	6	6	8	9	10	10	10	11	8	8	9	9	9	9	9	9	9	11	9	9
23608	257	257	16	18	12	14	15	10	10	7	1	0	ID	0	0	6	6	6	7	7	7	9	8	5	5	5	5	7	6	6	6	8	9	10	10	10	11	8	8	9	9	9	9	9	9	9	11	9	9
25338-1	257	257	16	18	12	14	15	10	10	7	1	0	0	ID	0	6	6	6	7	7	7	9	8	5	5	5	5	7	6	6	6	8	9	10	10	10	11	8	8	9	9	9	9	9	9	9	11	9	9
25338-2	257	257	16	18	12	14	15	10	10	7	1	0	0	0	ID	6	6	6	7	7	7	9	8	5	5	5	5	7	6	6	6	8	9	10	10	10	11	8	8	9	9	9	9	9	9	9	11	9	9
21312	257	257	14	14	12	14	15	10	10	7	7	6	6	6	6	ID	6	6	7	7	7	9	8	5	5	5	5	7	6	6	6	8	9	10	10	10	11	8	8	9	9	9	9	9	9	9	11	9	9
23404-2K	257	257	16	18	12	14	15	10	10	7	7	6	6	6	6	6	ID	0	1	1	1	7	6	3	3	3	3	5	4	4	4	8	9	10	10	10	11	8	8	9	9	9	9	9	9	9	11	9	9
23404-2T	257	257	16	18	12	14	15	10	10	7	7	6	6	6	6	6	0	ID	1	1	1	7	6	3	3	3	3	5	4	4	4	8	9	10	10	10	11	8	8	9	9	9	9	9	9	9	11	9	9
23404-4K	256	256	17	19	13	15	16	11	11	8	8	7	7	7	7	7	1	1	ID	0	1	8	7	4	4	4	4	6	5	5	5	9	10	11	11	11	12	9	9	10	10	10	10	10	10	10	12	10	10
23404-4T	256	256	17	19	13	15	16	11	11	8	8	7	7	7	7	7	1	1	0	ID	1	8	7	4	4	4	4	6	5	5	5	9	10	11	11	11	12	9	9	10	10	10	10	10	10	10	12	10	10
23404	257	257	17	19	13	15	16	11	11	8	8	7	7	7	7	7	1	1	1	1	ID	8	7	4	4	4	4	6	5	5	5	9	10	11	11	11	12	9	9	10	10	10	10	10	10	10	12	10	10
3306-1	258	258	17	19	13	15	18	13	13	10	10	9	9	9	9	9	7	7	8	8	8	ID	1	6	6	6	6	8	7	7	7	9	10	11	11	11	12	9	9	10	10	10	10	10	10	10	12	10	10
3306-2	257	257	16	18	12	14	17	12	12	9	9	8	8	8	8	8	6	6	7	7	7	1	ID	5	5	5	5	7	6	6	6	8	9	10	10	10	11	8	8	9	9	9	9	9	9	9	11	9	9
22477-1	256	256	15	17	11	13	14	9	9	6	6	5	5	5	5	5	3	3	4	4	4	6	5	ID	0	0	0	2	1	1	1	7	8	9	9	9	10	7	7	8	8	8	8	8	8	8	10	8	8
22477-2	256	256	15	17	11	13	14	9	9	6	6	5	5	5	5	5	3	3	4	4	4	6	5	0	ID	0	0	2	1	1	1	7	8	9	9	9	10	7	7	8	8	8	8	8	8	8	10	8	8
25702-2	256	256	15	17	11	13	14	9	9	6	6	5	5	5	5	5	3	3	4	4	4	6	5	0	0	ID	0	2	1	1	1	7	8	9	9	9	10	7	7	8	8	8	8	8	8	8	10	8	8
22684	256	256	15	17	11	13	14	9	9	6	6	5	5	5	5	5	3	3	4	4	4	6	5	0	0	0	ID	2	1	1	1	7	8	9	9	9	10	7	7	8	8	8	8	8	8	8	10	8	8
2755	256	256	17	19	13	15	16	11	11	8	8	7	7	7	7	7	5	5	6	6	6	8	7	2	2	2	2	ID	3	3	3	9	10	11	11	11	12	9	9	10	10	10	10	10	10	10	12	10	10
25827-1	257	257	16	18	12	14	15	10	10	7	7	6	6	6	6	6	4	4	5	5	5	7	6	1	1	1	1	3	ID	0	0	8	9	10	10	10	11	8	8	9	9	9	9	9	9	9	11	9	9
25827-2	257	257	16	18	12	14	15	10	10	7	7	6	6	6	6	6	4	4	5	5	5	7	6	1	1	1	1	3	0	ID	0	8	9	10	10	10	11	8	8	9	9	9	9	9	9	9	11	9	9
25827-3	257	257	16	18	12	14	15	10	10	7	7	6	6	6	6	6	4	4	5	5	5	7	6	1	1	1	1	3	0	0	ID	8	9	10	10	10	11	8	8	9	9	9	9	9	9	9	11	9	9
61-1	255	255	12	14	8	10	17	12	12	9	9	8	8	8	8	8	8	8	9	9	9	9	8	7	7	7	7	9	8	8	8	ID	1	4	4	4	5	2	2	3	3	3	3	3	3	3	5	3	3
61-2	254	254	13	15	9	11	18	13	13	10	10	9	9	9	9	9	9	9	10	10	10	10	9	8	8	8	8	10	9	9	9	1	ID	5	5	5	6	3	3	4	4	4	4	4	4	4	6	4	4
785	253	253	14	16	10	12	19	14	14	11	11	10	10	10	10	10	10	10	11	11	11	11	10	9	9	9	9	11	10	10	10	4	5	ID	4	4	5	2	2	3	3	3	3	3	3	3	5	3	3
785	251	251	14	16	10	12	19	14	14	11	11	10	10	10	10	10	10	10	11	11	11	11	10	9	9	9	9	11	10	10	10	4	5	4	ID	4	5	2	2	3	3	3	3	3	3	3	5	3	3
22224-2T	253	253	14	16	10	12	19	14	14	11	11	10	10	10	10	10	10	10	11	11	11	11	10	9	9	9	9	11	10	10	10	4	5	4	4	ID	5	2	2	1	1	1	1	1	1	1	5	3	3
25322-179	256	256	15	17	11	13	20	15	15	12	12	11	11	11	11	11	11	11	12	12	12	12	11	10	10	10	10	12	11	11	11	5	6	5	5	5	ID	3	3	4	4	4	4	4	4	4	6	4	4
25322-205	253	253	12	14	8	10	17	12	12	9	9	8	8	8	8	8	8	8	9	9	9	9	8	7	7	7	7	9	8	8	8	2	3	2	2	2	3	ID	0	1	1	1	1	1	1	1	3	1	1
25322-229	253	253	12	14	8	10	17	12	12	9	9	8	8	8	8	8	8	8	9	9	9	9	8	7	7	7	7	9	8	8	8	2	3	2	2	2	3	0	ID	1	1	1	1	1	1	1	3	1	1
22224-3K	252	252	13	15	9	11	18	13	13	10	10	9	9	9	9	9	9	9	10	10	10	10	9	8	8	8	8	10	9	9	9	3	4	3	3	1	4	1	1	ID	0	0	0	0	0	0	4	2	2
22224-3T	252	252	13	15	9	11	18	13	13	10	10	9	9	9	9	9	9	9	10	10	10	10	9	8	8	8	8	10	9	9	9	3	4	3	3	1	4	1	1	0	ID	0	0	0	0	0	4	2	2
22224-4T	252	252	13	15	9	11	18	13	13	10	10	9	9	9	9	9	9	9	10	10	10	10	9	8	8	8	8	10	9	9	9	3	4	3	3	1	4	1	1	0	0	ID	0	0	0	0	4	2	2
23589-1T	252	252	13	15	9	11	18	13	13	10	10	9	9	9	9	9	9	9	10	10	10	10	9	8	8	8	8	10	9	9	9	3	4	3	3	1	4	1	1	0	0	0	ID	0	0	0	4	2	2
23589-3	252	252	13	15	9	11	18	13	13	10	10	9	9	9	9	9	9	9	10	10	10	10	9	8	8	8	8	10	9	9	9	3	4	3	3	1	4	1	1	0	0	0	0	ID	0	0	4	2	2
23589-1T	252	252	13	15	9	11	18	13	13	10	10	9	9	9	9	9	9	9	10	10	10	10	9	8	8	8	8	10	9	9	9	3	4	3	3	1	4	1	1	0	0	0	0	0	ID	0	4	2	2
23589-4	252	252	13	15	9	11	18	13	13	10	10	9	9	9	9	9	9	9	10	10	10	10	9	8	8	8	8	10	9	9	9	3	4	3	3	1	4	1	1	0	0	0	0	0	0	ID	4	2	2
23458-1K	252	252	15	17	11	13	20	15	15	12	12	11	11	11	11	11	11	11	12	12	12	12	11	10	10	10	10	12	11	11	11	5	6	5	5	5	6	3	3	4	4	4	4	4	4	4	ID	3	3
23458-2T	252	252	13	15	9	11	18	13	13	10	10	9	9	9	9	9	9	9	10	10	10	10	9	8	8	8	8	10	9	9	9	3	4	3	3	3	4	1	1	2	2	2	2	2	2	2	3	ID	0
23458-4T	252	252	13	15	9	11	18	13	13	10	10	9	9	9	9	9	9	9	10	10	10	10	9	8	8	8	8	10	9	9	9	3	4	3	3	3	4	1	1	2	2	2	2	2	2	2	3	0	ID
23458-5T	252	252	13	15	9	11	18	13	13	10	10	9	9	9	9	9	9	9	10	10	10	10	9	8	8	8	8	10	9	9	9	3	4	3	3	3	4	1	1	2	2	2	2	2	2	2	3	0	0
913	253	253	14	16	10	12	19	14	14	11	11	10	10	10	10	10	10	10	11	11	11	11	10	9	9	9	9	11	10	10	10	4	5	0	4	4	5	2	2	3	3	3	3	3	3	3	5	3	3
913	253	253	14	16	10	12	19	14	14	11	11	10	10	10	10	10	10	10	11	11	11	11	10	9	9	9	9	11	10	10	10	4	5	0	4	4	5	2	2	3	3	3	3	3	3	3	5	3	3
913	253	253	14	16	10	12	19	14	14	11	11	10	10	10	10	10	10	10	11	11	11	11	10	9	9	9	9	11	10	10	10	4	5	0	4	4	5	2	2	3	3	3	3	3	3	3	5	3	3
22750	251	251	14	16	10	12	19	14	14	11	11	10	10	10	10	10	10	10	11	11	11	11	10	9	9	9	9	11	10	10	10	4	5	4	4	4	5	2	2	3	3	3	3	3	3	3	3	3	3
22608-1	252	252	13	15	9	11	18	13	13	10	10	9	9	9	9	9	9	9	10	10	10	10	9	8	8	8	8	10	9	9	9	3	4	3	3	3	4	1	1	2	2	2	2	2	2	2	2	2	2
22608-1T	252	252	13	15	9	11	18	13	13	10	10	9	9	9	9	9	9	9	10	10	10	10	9	8	8	8	8	10	9	9	9	3	4	3	3	3	4	1	1	2	2	2	2	2	2	2	2	2	2
22608-2	252	252	14	16	10	12	19	14	14	11	11	10	10	10	10	10	10	10	11	11	11	11	10	9	9	9	9	11	10	10	10	4	5	4	4	4	5	2	2	3	3	3	3	3	3	3	3	3	3
22608-2T	252	252	13	15	9	11	18	13	13	10	10	9	9	9	9	9	9	9	10	10	10	10	9	8	8	8	8	10	9	9	9	3	4	3	3	3	4	1	1	2	2	2	2	2	2	2	2	2	2
22608-3T	252	252	13	15	9	11	18	13	13	10	10	9	9	9	9	9	9	9	10	10	10	10	9	8	8	8	8	10	9	9	9	3	4	3	3	3	4	1	1	2	2	2	2	2	2	2	2	2	2
[truncated: 70 more columns]

## Sheet: NP
Sequence Identity Matrix
NP-nt	3306-2	3306-1	20689-27T	20689-28T	23608	23609	23608-1K	25338-1	25338-2	8028-1	8028-2	2968	25690	22380	18520-2	18520-1	63	21312	25702-2	25827-2	25827-1	25827-3	2755	22684	22477-1	22477-2	23404-2T	23404-4K	23404-4T	23404-2K	23404	61-1	61-2	785	785	913	913	913	25322-179	25322-205	25322-229	23458-1K	23458-4T	23458-2T	23458-5T	22750	22608-1	22608-2	22608-3T
3306-2	ID	0.998	0.994	0.994	0.964	0.965	0.965	0.966	0.966	0.935	0.934	0.935	0.938	0.937	0.935	0.935	0.937	0.934	0.933	0.933	0.933	0.933	0.933	0.934	0.933	0.933	0.933	0.933	0.933	0.933	0.933	0.935	0.935	0.934	0.935	0.934	0.934	0.934	0.934	0.935	0.934	0.933	0.934	0.935	0.933	0.935	0.935	0.935	0.935
3306-1	0.998	ID	0.995	0.995	0.965	0.966	0.966	0.966	0.966	0.935	0.935	0.936	0.938	0.937	0.936	0.936	0.937	0.935	0.933	0.933	0.933	0.933	0.933	0.934	0.933	0.934	0.935	0.935	0.935	0.935	0.935	0.935	0.935	0.934	0.935	0.934	0.934	0.934	0.934	0.935	0.934	0.934	0.935	0.935	0.933	0.935	0.937	0.937	0.935
20689-27T	0.994	0.995	ID	1	0.968	0.969	0.969	0.968	0.968	0.937	0.937	0.938	0.939	0.939	0.937	0.937	0.938	0.936	0.935	0.935	0.935	0.935	0.935	0.935	0.935	0.935	0.935	0.935	0.935	0.935	0.935	0.936	0.936	0.935	0.936	0.935	0.935	0.935	0.935	0.936	0.935	0.935	0.936	0.936	0.935	0.937	0.937	0.937	0.936
20689-28T	0.994	0.995	1	ID	0.968	0.969	0.969	0.968	0.968	0.937	0.937	0.938	0.939	0.939	0.937	0.937	0.938	0.936	0.935	0.935	0.935	0.935	0.935	0.935	0.935	0.935	0.935	0.935	0.935	0.935	0.935	0.936	0.936	0.935	0.936	0.935	0.935	0.935	0.935	0.936	0.935	0.935	0.936	0.936	0.935	0.937	0.937	0.937	0.936
23608	0.964	0.965	0.968	0.968	ID	0.998	0.998	0.998	0.998	0.934	0.933	0.935	0.935	0.935	0.935	0.935	0.935	0.933	0.932	0.932	0.932	0.932	0.932	0.933	0.932	0.932	0.933	0.933	0.933	0.933	0.933	0.935	0.935	0.934	0.935	0.934	0.934	0.934	0.934	0.935	0.934	0.933	0.935	0.935	0.933	0.934	0.935	0.935	0.933
23609	0.965	0.966	0.969	0.969	0.998	ID	1	0.999	0.999	0.935	0.934	0.935	0.935	0.936	0.936	0.936	0.936	0.934	0.933	0.933	0.933	0.933	0.933	0.933	0.933	0.933	0.933	0.933	0.933	0.933	0.933	0.935	0.935	0.935	0.935	0.935	0.935	0.935	0.935	0.935	0.935	0.934	0.935	0.935	0.934	0.935	0.935	0.935	0.934
23608-1K	0.965	0.966	0.969	0.969	0.998	1	ID	0.999	0.999	0.935	0.934	0.935	0.935	0.936	0.936	0.936	0.936	0.934	0.933	0.933	0.933	0.933	0.933	0.933	0.933	0.933	0.933	0.933	0.933	0.933	0.933	0.935	0.935	0.935	0.935	0.935	0.935	0.935	0.935	0.935	0.935	0.934	0.935	0.935	0.934	0.935	0.935	0.935	0.934
25338-1	0.966	0.966	0.968	0.968	0.998	0.999	0.999	ID	1	0.934	0.933	0.935	0.936	0.937	0.936	0.936	0.937	0.934	0.933	0.933	0.933	0.933	0.933	0.934	0.933	0.933	0.933	0.933	0.933	0.933	0.933	0.936	0.936	0.935	0.936	0.935	0.935	0.935	0.935	0.936	0.935	0.934	0.935	0.936	0.935	0.935	0.935	0.935	0.935
25338-2	0.966	0.966	0.968	0.968	0.998	0.999	0.999	1	ID	0.934	0.933	0.935	0.936	0.937	0.936	0.936	0.937	0.934	0.933	0.933	0.933	0.933	0.933	0.934	0.933	0.933	0.933	0.933	0.933	0.933	0.933	0.936	0.936	0.935	0.936	0.935	0.935	0.935	0.935	0.936	0.935	0.934	0.935	0.936	0.935	0.935	0.935	0.935	0.935
8028-1	0.935	0.935	0.937	0.937	0.934	0.935	0.935	0.934	0.934	ID	0.999	0.999	0.967	0.968	0.967	0.967	0.964	0.968	0.966	0.966	0.966	0.966	0.966	0.967	0.966	0.966	0.967	0.967	0.967	0.967	0.967	0.969	0.969	0.968	0.969	0.968	0.968	0.968	0.97	0.97	0.97	0.969	0.97	0.97	0.969	0.97	0.97	0.97	0.969
8028-2	0.934	0.935	0.937	0.937	0.933	0.934	0.934	0.933	0.933	0.999	ID	0.998	0.968	0.968	0.966	0.966	0.964	0.967	0.966	0.966	0.966	0.966	0.966	0.966	0.966	0.966	0.966	0.966	0.966	0.966	0.966	0.968	0.968	0.968	0.968	0.968	0.968	0.968	0.969	0.97	0.969	0.968	0.97	0.97	0.968	0.969	0.97	0.97	0.968
2968	0.935	0.936	0.938	0.938	0.935	0.935	0.935	0.935	0.935	0.999	0.998	ID	0.968	0.968	0.968	0.968	0.965	0.968	0.967	0.967	0.967	0.967	0.967	0.968	0.967	0.967	0.968	0.968	0.968	0.968	0.968	0.97	0.97	0.969	0.97	0.969	0.969	0.969	0.97	0.971	0.97	0.97	0.971	0.971	0.97	0.97	0.971	0.971	0.97
25690	0.938	0.938	0.939	0.939	0.935	0.935	0.935	0.936	0.936	0.967	0.968	0.968	ID	0.996	0.977	0.977	0.975	0.976	0.977	0.977	0.977	0.977	0.977	0.978	0.977	0.976	0.977	0.977	0.977	0.977	0.977	0.978	0.978	0.978	0.978	0.978	0.978	0.978	0.978	0.978	0.978	0.976	0.978	0.978	0.977	0.978	0.978	0.978	0.977
22380	0.937	0.937	0.939	0.939	0.935	0.936	0.936	0.937	0.937	0.968	0.968	0.968	0.996	ID	0.977	0.977	0.975	0.976	0.977	0.977	0.977	0.977	0.977	0.978	0.977	0.976	0.977	0.977	0.977	0.977	0.977	0.978	0.978	0.978	0.978	0.978	0.978	0.978	0.978	0.978	0.978	0.976	0.978	0.978	0.977	0.978	0.978	0.978	0.977
18520-2	0.935	0.936	0.937	0.937	0.935	0.936	0.936	0.936	0.936	0.967	0.966	0.968	0.977	0.977	ID	1	0.988	0.99	0.99	0.99	0.99	0.99	0.99	0.99	0.99	0.99	0.991	0.991	0.991	0.991	0.991	0.991	0.991	0.99	0.991	0.99	0.99	0.99	0.99	0.991	0.99	0.99	0.992	0.991	0.99	0.99	0.992	0.992	0.99
18520-1	0.935	0.936	0.937	0.937	0.935	0.936	0.936	0.936	0.936	0.967	0.966	0.968	0.977	0.977	1	ID	0.988	0.99	0.99	0.99	0.99	0.99	0.99	0.99	0.99	0.99	0.991	0.991	0.991	0.991	0.991	0.991	0.991	0.99	0.991	0.99	0.99	0.99	0.99	0.991	0.99	0.99	0.992	0.991	0.99	0.99	0.992	0.992	0.99
63	0.937	0.937	0.938	0.938	0.935	0.936	0.936	0.937	0.937	0.964	0.964	0.965	0.975	0.975	0.988	0.988	ID	0.992	0.993	0.993	0.993	0.993	0.993	0.994	0.993	0.992	0.993	0.993	0.993	0.993	0.993	0.994	0.994	0.993	0.994	0.993	0.993	0.993	0.993	0.994	0.993	0.992	0.993	0.994	0.992	0.993	0.993	0.993	0.992
21312	0.934	0.935	0.936	0.936	0.933	0.934	0.934	0.934	0.934	0.968	0.967	0.968	0.976	0.976	0.99	0.99	0.992	ID	0.995	0.995	0.995	0.995	0.995	0.996	0.995	0.996	0.996	0.996	0.996	0.996	0.996	0.995	0.995	0.994	0.995	0.994	0.994	0.994	0.994	0.995	0.994	0.994	0.996	0.995	0.994	0.994	0.996	0.996	0.994
25702-2	0.933	0.933	0.935	0.935	0.932	0.933	0.933	0.933	0.933	0.966	0.966	0.967	0.977	0.977	0.99	0.99	0.993	0.995	ID	0.998	0.998	0.998	0.998	0.999	0.998	0.998	0.998	0.998	0.998	0.998	0.998	0.996	0.996	0.995	0.996	0.995	0.995	0.995	0.995	0.996	0.995	0.994	0.995	0.996	0.994	0.995	0.995	0.995	0.994
25827-2	0.933	0.933	0.935	0.935	0.932	0.933	0.933	0.933	0.933	0.966	0.966	0.967	0.977	0.977	0.99	0.99	0.993	0.995	0.998	ID	1	1	0.998	0.999	0.998	0.998	0.998	0.998	0.998	0.998	0.998	0.996	0.996	0.995	0.996	0.995	0.995	0.995	0.995	0.996	0.995	0.994	0.995	0.996	0.994	0.995	0.995	0.995	0.994
25827-1	0.933	0.933	0.935	0.935	0.932	0.933	0.933	0.933	0.933	0.966	0.966	0.967	0.977	0.977	0.99	0.99	0.993	0.995	0.998	1	ID	1	0.998	0.999	0.998	0.998	0.998	0.998	0.998	0.998	0.998	0.996	0.996	0.995	0.996	0.995	0.995	0.995	0.995	0.996	0.995	0.994	0.995	0.996	0.994	0.995	0.995	0.995	0.994
25827-3	0.933	0.933	0.935	0.935	0.932	0.933	0.933	0.933	0.933	0.966	0.966	0.967	0.977	0.977	0.99	0.99	0.993	0.995	0.998	1	1	ID	0.998	0.999	0.998	0.998	0.998	0.998	0.998	0.998	0.998	0.996	0.996	0.995	0.996	0.995	0.995	0.995	0.995	0.996	0.995	0.994	0.995	0.996	0.994	0.995	0.995	0.995	0.994
2755	0.933	0.933	0.935	0.935	0.932	0.933	0.933	0.933	0.933	0.966	0.966	0.967	0.977	0.977	0.99	0.99	0.993	0.995	0.998	0.998	0.998	0.998	ID	0.999	0.998	0.998	0.998	0.998	0.998	0.998	0.998	0.996	0.996	0.995	0.996	0.995	0.995	0.995	0.995	0.996	0.995	0.994	0.995	0.996	0.994	0.995	0.995	0.995	0.994
22684	0.934	0.934	0.935	0.935	0.933	0.933	0.933	0.934	0.934	0.967	0.966	0.968	0.978	0.978	0.99	0.99	0.994	0.996	0.999	0.999	0.999	0.999	0.999	ID	0.999	0.998	0.999	0.999	0.999	0.999	0.999	0.996	0.996	0.996	0.996	0.996	0.996	0.996	0.996	0.996	0.996	0.994	0.996	0.996	0.995	0.996	0.996	0.996	0.995
22477-1	0.933	0.933	0.935	0.935	0.932	0.933	0.933	0.933	0.933	0.966	0.966	0.967	0.977	0.977	0.99	0.99	0.993	0.995	0.998	0.998	0.998	0.998	0.998	0.999	ID	0.999	0.998	0.998	0.998	0.998	0.998	0.996	0.996	0.995	0.996	0.995	0.995	0.995	0.995	0.996	0.995	0.994	0.995	0.996	0.994	0.995	0.995	0.995	0.994
22477-2	0.933	0.934	0.935	0.935	0.932	0.933	0.933	0.933	0.933	0.966	0.966	0.967	0.976	0.976	0.99	0.99	0.992	0.996	0.998	0.998	0.998	0.998	0.998	0.998	0.999	ID	0.999	0.999	0.999	0.999	0.999	0.995	0.995	0.994	0.995	0.994	0.994	0.994	0.994	0.995	0.994	0.994	0.996	0.995	0.994	0.994	0.996	0.996	0.994
23404-2T	0.933	0.935	0.935	0.935	0.933	0.933	0.933	0.933	0.933	0.967	0.966	0.968	0.977	0.977	0.991	0.991	0.993	0.996	0.998	0.998	0.998	0.998	0.998	0.999	0.998	0.999	ID	1	1	1	1	0.996	0.996	0.995	0.996	0.995	0.995	0.995	0.995	0.996	0.995	0.994	0.996	0.996	0.994	0.995	0.996	0.996	0.994
23404-4K	0.933	0.935	0.935	0.935	0.933	0.933	0.933	0.933	0.933	0.967	0.966	0.968	0.977	0.977	0.991	0.991	0.993	0.996	0.998	0.998	0.998	0.998	0.998	0.999	0.998	0.999	1	ID	1	1	1	0.996	0.996	0.995	0.996	0.995	0.995	0.995	0.995	0.996	0.995	0.994	0.996	0.996	0.994	0.995	0.996	0.996	0.994
23404-4T	0.933	0.935	0.935	0.935	0.933	0.933	0.933	0.933	0.933	0.967	0.966	0.968	0.977	0.977	0.991	0.991	0.993	0.996	0.998	0.998	0.998	0.998	0.998	0.999	0.998	0.999	1	1	ID	1	1	0.996	0.996	0.995	0.996	0.995	0.995	0.995	0.995	0.996	0.995	0.994	0.996	0.996	0.994	0.995	0.996	0.996	0.994
23404-2K	0.933	0.935	0.935	0.935	0.933	0.933	0.933	0.933	0.933	0.967	0.966	0.968	0.977	0.977	0.991	0.991	0.993	0.996	0.998	0.998	0.998	0.998	0.998	0.999	0.998	0.999	1	1	1	ID	1	0.996	0.996	0.995	0.996	0.995	0.995	0.995	0.995	0.996	0.995	0.994	0.996	0.996	0.994	0.995	0.996	0.996	0.994
23404	0.933	0.935	0.935	0.935	0.933	0.933	0.933	0.933	0.933	0.967	0.966	0.968	0.977	0.977	0.991	0.991	0.993	0.996	0.998	0.998	0.998	0.998	0.998	0.999	0.998	0.999	1	1	1	1	ID	0.996	0.996	0.995	0.996	0.995	0.995	0.995	0.995	0.996	0.995	0.994	0.996	0.996	0.994	0.995	0.996	0.996	0.994
61-1	0.935	0.935	0.936	0.936	0.935	0.935	0.935	0.936	0.936	0.969	0.968	0.97	0.978	0.978	0.991	0.991	0.994	0.995	0.996	0.996	0.996	0.996	0.996	0.996	0.996	0.995	0.996	0.996	0.996	0.996	0.996	ID	1	0.998	0.998	0.998	0.998	0.998	0.998	0.998	0.998	0.996	0.998	0.998	0.997	0.998	0.998	0.998	0.997
61-2	0.935	0.935	0.936	0.936	0.935	0.935	0.935	0.936	0.936	0.969	0.968	0.97	0.978	0.978	0.991	0.991	0.994	0.995	0.996	0.996	0.996	0.996	0.996	0.996	0.996	0.995	0.996	0.996	0.996	0.996	0.996	1	ID	0.998	0.998	0.998	0.998	0.998	0.998	0.998	0.998	0.996	0.998	0.998	0.997	0.998	0.998	0.998	0.997
785	0.934	0.934	0.935	0.935	0.934	0.935	0.935	0.935	0.935	0.968	0.968	0.969	0.978	0.978	0.99	0.99	0.993	0.994	0.995	0.995	0.995	0.995	0.995	0.996	0.995	0.994	0.995	0.995	0.995	0.995	0.995	0.998	0.998	ID	0.998	1	1	1	0.997	0.998	0.997	0.996	0.997	0.998	0.996	0.997	0.997	0.997	0.996
785	0.935	0.935	0.936	0.936	0.935	0.935	0.935	0.936	0.936	0.969	0.968	0.97	0.978	0.978	0.991	0.991	0.994	0.995	0.996	0.996	0.996	0.996	0.996	0.996	0.996	0.995	0.996	0.996	0.996	0.996	0.996	0.998	0.998	0.998	ID	0.998	0.998	0.998	0.998	0.998	0.998	0.996	0.998	0.998	0.997	0.998	0.998	0.998	0.997
913	0.934	0.934	0.935	0.935	0.934	0.935	0.935	0.935	0.935	0.968	0.968	0.969	0.978	0.978	0.99	0.99	0.993	0.994	0.995	0.995	0.995	0.995	0.995	0.996	0.995	0.994	0.995	0.995	0.995	0.995	0.995	0.998	0.998	1	0.998	ID	1	1	0.997	0.998	0.997	0.996	0.997	0.998	0.996	0.997	0.997	0.997	0.996
913	0.934	0.934	0.935	0.935	0.934	0.935	0.935	0.935	0.935	0.968	0.968	0.969	0.978	0.978	0.99	0.99	0.993	0.994	0.995	0.995	0.995	0.995	0.995	0.996	0.995	0.994	0.995	0.995	0.995	0.995	0.995	0.998	0.998	1	0.998	1	ID	1	0.997	0.998	0.997	0.996	0.997	0.998	0.996	0.997	0.997	0.997	0.996
913	0.934	0.934	0.935	0.935	0.934	0.935	0.935	0.935	0.935	0.968	0.968	0.969	0.978	0.978	0.99	0.99	0.993	0.994	0.995	0.995	0.995	0.995	0.995	0.996	0.995	0.994	0.995	0.995	0.995	0.995	0.995	0.998	0.998	1	0.998	1	1	ID	0.997	0.998	0.997	0.996	0.997	0.998	0.996	0.997	0.997	0.997	0.996
25322-179	0.934	0.934	0.935	0.935	0.934	0.935	0.935	0.935	0.935	0.97	0.969	0.97	0.978	0.978	0.99	0.99	0.993	0.994	0.995	0.995	0.995	0.995	0.995	0.996	0.995	0.994	0.995	0.995	0.995	0.995	0.995	0.998	0.998	0.997	0.998	0.997	0.997	0.997	ID	0.999	0.998	0.996	0.998	0.999	0.998	0.997	0.997	0.997	0.996
25322-205	0.935	0.935	0.936	0.936	0.935	0.935	0.935	0.936	0.936	0.97	0.97	0.971	0.978	0.978	0.991	0.991	0.994	0.995	0.996	0.996	0.996	0.996	0.996	0.996	0.996	0.995	0.996	0.996	0.996	0.996	0.996	0.998	0.998	0.998	0.998	0.998	0.998	0.998	0.999	ID	0.999	0.997	0.999	1	0.998	0.998	0.998	0.998	0.997
25322-229	0.934	0.934	0.935	0.935	0.934	0.935	0.935	0.935	0.935	0.97	0.969	0.97	0.978	0.978	0.99	0.99	0.993	0.994	0.995	0.995	0.995	0.995	0.995	0.996	0.995	0.994	0.995	0.995	0.995	0.995	0.995	0.998	0.998	0.997	0.998	0.997	0.997	0.997	0.998	0.999	ID	0.996	0.998	0.999	0.998	0.997	0.997	0.997	0.996
23458-1K	0.933	0.934	0.935	0.935	0.933	0.934	0.934	0.934	0.934	0.969	0.968	0.97	0.976	0.976	0.99	0.99	0.992	0.994	0.994	0.994	0.994	0.994	0.994	0.994	0.994	0.994	0.994	0.994	0.994	0.994	0.994	0.996	0.996	0.996	0.996	0.996	0.996	0.996	0.996	0.997	0.996	ID	0.997	0.997	0.996	0.997	0.997	0.997	0.996
23458-4T	0.934	0.935	0.936	0.936	0.935	0.935	0.935	0.935	0.935	0.97	0.97	0.971	0.978	0.978	0.992	0.992	0.993	0.996	0.995	0.995	0.995	0.995	0.995	0.996	0.995	0.996	0.996	0.996	0.996	0.996	0.996	0.998	0.998	0.997	0.998	0.997	0.997	0.997	0.998	0.999	0.998	0.997	ID	0.999	0.998	0.997	0.998	0.998	0.996
23458-2T	0.935	0.935	0.936	0.936	0.935	0.935	0.935	0.936	0.936	0.97	0.97	0.971	0.978	0.978	0.991	0.991	0.994	0.995	0.996	0.996	0.996	0.996	0.996	0.996	0.996	0.995	0.996	0.996	0.996	0.996	0.996	0.998	0.998	0.998	0.998	0.998	0.998	0.998	0.999	1	0.999	0.997	0.999	ID	0.998	0.998	0.998	0.998	0.997
23458-5T	0.933	0.933	0.935	0.935	0.933	0.934	0.934	0.935	0.935	0.969	0.968	0.97	0.977	0.977	0.99	0.99	0.992	0.994	0.994	0.994	0.994	0.994	0.994	0.995	0.994	0.994	0.994	0.994	0.994	0.994	0.994	0.997	0.997	0.996	0.997	0.996	0.996	0.996	0.998	0.998	0.998	0.996	0.998	0.998	ID	0.996	0.996	0.996	0.997
22750	0.935	0.935	0.937	0.937	0.934	0.935	0.935	0.935	0.935	0.97	0.969	0.97	0.978	0.978	0.99	0.99	0.993	0.994	0.995	0.995	0.995	0.995	0.995	0.996	0.995	0.994	0.995	0.995	0.995	0.995	0.995	0.998	0.998	0.997	0.998	0.997	0.997	0.997	0.997	0.998	0.997	0.997	0.997	0.998	0.996	ID	0.998	0.998	0.998
22608-1	0.935	0.937	0.937	0.937	0.935	0.935	0.935	0.935	0.935	0.97	0.97	0.971	0.978	0.978	0.992	0.992	0.993	0.996	0.995	0.995	0.995	0.995	0.995	0.996	0.995	0.996	0.996	0.996	0.996	0.996	0.996	0.998	0.998	0.997	0.998	0.997	0.997	0.997	0.997	0.998	0.997	0.997	0.998	0.998	0.996	0.998	ID	1	0.998
22608-2	0.935	0.937	0.937	0.937	0.935	0.935	0.935	0.935	0.935	0.97	0.97	0.971	0.978	0.978	0.992	0.992	0.993	0.996	0.995	0.995	0.995	0.995	0.995	0.996	0.995	0.996	0.996	0.996	0.996	0.996	0.996	0.998	0.998	0.997	0.998	0.997	0.997	0.997	0.997	0.998	0.997	0.997	0.998	0.998	0.996	0.998	1	ID	0.998
22608-3T	0.935	0.935	0.936	0.936	0.933	0.934	0.934	0.935	0.935	0.969	0.968	0.97	0.977	0.977	0.99	0.99	0.992	0.994	0.994	0.994	0.994	0.994	0.994	0.995	0.994	0.994	0.994	0.994	0.994	0.994	0.994	0.997	0.997	0.996	0.997	0.996	0.996	0.996	0.996	0.997	0.996	0.996	0.996	0.997	0.997	0.998	0.998	0.998	ID
22608-1T	0.936	0.936	0.937	0.937	0.935	0.935	0.935	0.936	0.936	0.97	0.97	0.971	0.978	0.978	0.991	0.991	0.994	0.995	0.996	0.996	0.996	0.996	0.996	0.996	0.996	0.995	0.996	0.996	0.996	0.996	0.996	0.998	0.998	0.998	0.998	0.998	0.998	0.998	0.998	0.998	0.998	0.997	0.998	0.998	0.997	0.999	0.999	0.999	0.998
22608-2T	0.936	0.936	0.937	0.937	0.935	0.935	0.935	0.936	0.936	0.97	0.97	0.971	0.978	0.978	0.991	0.991	0.994	0.995	0.996	0.996	0.996	0.996	0.996	0.996	0.996	0.995	0.996	0.996	0.996	0.996	0.996	0.998	0.998	0.998	0.998	0.998	0.998	0.998	0.998	0.998	0.998	0.997	0.998	0.998	0.997	0.999	0.999	0.999	0.998
23589-3	0.935	0.936	0.937	0.937	0.935	0.936	0.936	0.936	0.936	0.97	0.969	0.97	0.978	0.978	0.992	0.992	0.994	0.996	0.996	0.996	0.996	0.996	0.996	0.996	0.996	0.996	0.997	0.997	0.997	0.997	0.997	0.998	0.998	0.998	0.998	0.998	0.998	0.998	0.998	0.998	0.998	0.997	0.999	0.998	0.997	0.998	0.999	0.999	0.997
23589-1T	0.935	0.936	0.937	0.937	0.935	0.936	0.936	0.936	0.936	0.97	0.969	0.97	0.978	0.978	0.992	0.992	0.994	0.996	0.996	0.996	0.996	0.996	0.996	0.996	0.996	0.996	0.997	0.997	0.997	0.997	0.997	0.998	0.998	0.998	0.998	0.998	0.998	0.998	0.998	0.998	0.998	0.997	0.999	0.998	0.997	0.998	0.999	0.999	0.997
23589-4	0.935	0.936	0.937	0.937	0.935	0.936	0.936	0.936	0.936	0.97	0.969	0.97	0.978	0.978	0.992	0.992	0.994	0.996	0.996	0.996	0.996	0.996	0.996	0.996	0.996	0.996	0.997	0.997	0.997	0.997	0.997	0.998	0.998	0.998	0.998	0.998	0.998	0.998	0.998	0.998	0.998	0.997	0.999	0.998	0.997	0.998	0.999	0.999	0.997
23589-1T	0.935	0.936	0.937	0.937	0.935	0.936	0.936	0.936	0.936	0.97	0.969	0.97	0.978	0.978	0.992	0.992	0.994	0.996	0.996	0.996	0.996	0.996	0.996	0.996	0.996	0.996	0.997	0.997	0.997	0.997	0.997	0.998	0.998	0.998	0.998	0.998	0.998	0.998	0.998	0.998	0.998	0.997	0.999	0.998	0.997	0.998	0.999	0.999	0.997
22224-2T	0.935	0.936	0.937	0.937	0.935	0.936	0.936	0.936	0.936	0.97	0.969	0.97	0.978	0.978	0.992	0.992	0.994	0.996	0.996	0.996	0.996	0.996	0.996	0.996	0.996	0.996	0.997	0.997	0.997	0.997	0.997	0.998	0.998	0.998	0.998	0.998	0.998	0.998	0.998	0.998	0.998	0.997	0.999	0.998	0.997	0.998	0.999	0.999	0.997
22224-4T	0.935	0.936	0.937	0.937	0.935	0.936	0.936	0.936	0.936	0.97	0.969	0.97	0.978	0.978	0.992	0.992	0.994	0.996	0.996	0.996	0.996	0.996	0.996	0.996	0.996	0.996	0.997	0.997	0.997	0.997	0.997	0.998	0.998	0.998	0.998	0.998	0.998	0.998	0.998	0.998	0.998	0.997	0.999	0.998	0.997	0.998	0.999	0.999	0.997
22224-3K	0.935	0.936	0.937	0.937	0.935	0.936	0.936	0.936	0.936	0.97	0.969	0.97	0.978	0.978	0.992	0.992	0.994	0.996	0.996	0.996	0.996	0.996	0.996	0.996	0.996	0.996	0.997	0.997	0.997	0.997	0.997	0.998	0.998	0.998	0.998	0.998	0.998	0.998	0.998	0.998	0.998	0.997	0.999	0.998	0.997	0.998	0.999	0.999	0.997
22224-3T	0.935	0.936	0.937	0.937	0.935	0.936	0.936	0.936	0.936	0.97	0.969	0.97	0.978	0.978	0.992	0.992	0.994	0.996	0.996	0.996	0.996	0.996	0.996	0.996	0.996	0.996	0.997	0.997	0.997	0.997	0.997	0.998	0.998	0.998	0.998	0.998	0.998	0.998	0.998	0.998	0.998	0.997	0.999	0.998	0.997	0.998	0.999	0.999	0.997
Sequence Difference Count Matrix
NP-nt	3306-2	3306-1	20689-27T	20689-28T	23608	23609	23608-1K	25338-1	25338-2	8028-1	8028-2	2968	25690	22380	18520-2	18520-1	63	21312	25702-2	25827-2	25827-1	25827-3	2755	22684	22477-1	22477-2	23404-2T	23404-4K	23404-4T	23404-2K	23404	61-1	61-2	785	785	913	913	913	25322-179	25322-205	25322-229	23458-1K	23458-4T	23458-2T	23458-5T	22750	22608-1	22608-2	22608-3T
3306-2	ID	2	8	8	53	52	52	51	51	98	99	97	93	94	98	98	95	99	100	100	100	100	100	99	100	101	100	100	100	100	100	98	98	99	98	99	99	99	99	98	99	100	99	98	100	97	97	97	98
3306-1	2	ID	7	7	52	51	51	51	51	97	98	96	93	94	96	96	95	97	100	100	100	100	100	99	100	99	98	98	98	98	98	98	98	99	98	99	99	99	99	98	99	99	97	98	100	97	95	95	98
20689-27T	8	7	ID	0	47	46	46	47	47	94	95	93	91	92	95	95	93	96	98	98	98	98	98	97	98	98	97	97	97	97	97	96	96	97	96	97	97	97	97	96	97	97	96	96	98	95	94	94	96
20689-28T	8	7	0	ID	47	46	46	47	47	94	95	93	91	92	95	95	93	96	98	98	98	98	98	97	98	98	97	97	97	97	97	96	96	97	96	97	97	97	97	96	97	97	96	96	98	95	94	94	96
23608	53	52	47	47	ID	2	2	3	3	99	100	98	98	97	97	97	97	100	102	102	102	102	102	101	102	102	101	101	101	101	101	98	98	99	98	99	99	99	99	98	99	100	98	98	100	99	98	98	100
23609	52	51	46	46	2	ID	0	1	1	98	99	97	97	96	96	96	96	99	101	101	101	101	101	100	101	101	100	100	100	100	100	97	97	98	97	98	98	98	98	97	98	99	97	97	99	98	97	97	99
23608-1K	52	51	46	46	2	0	ID	1	1	98	99	97	97	96	96	96	96	99	101	101	101	101	101	100	101	101	100	100	100	100	100	97	97	98	97	98	98	98	98	97	98	99	97	97	99	98	97	97	99
25338-1	51	51	47	47	3	1	1	ID	0	99	100	98	96	95	96	96	95	99	100	100	100	100	100	99	100	101	100	100	100	100	100	96	96	97	96	97	97	97	97	96	97	99	97	96	98	97	97	97	98
25338-2	51	51	47	47	3	1	1	0	ID	99	100	98	96	95	96	96	95	99	100	100	100	100	100	99	100	101	100	100	100	100	100	96	96	97	96	97	97	97	97	96	97	99	97	96	98	97	97	97	98
8028-1	98	97	94	94	99	98	98	99	99	ID	1	1	49	48	49	49	53	48	50	50	50	50	50	49	50	50	49	49	49	49	49	46	46	47	46	47	47	47	45	44	45	46	44	44	46	45	44	44	46
8028-2	99	98	95	95	100	99	99	100	100	1	ID	2	48	47	50	50	54	49	51	51	51	51	51	50	51	51	50	50	50	50	50	47	47	48	47	48	48	48	46	45	46	47	45	45	47	46	45	45	47
2968	97	96	93	93	98	97	97	98	98	1	2	ID	48	47	48	48	52	47	49	49	49	49	49	48	49	49	48	48	48	48	48	45	45	46	45	46	46	46	44	43	44	45	43	43	45	44	43	43	45
25690	93	93	91	91	98	97	97	96	96	49	48	48	ID	5	34	34	37	35	34	34	34	34	34	33	34	35	34	34	34	34	34	32	32	33	32	33	33	33	33	32	33	35	33	32	34	33	33	33	34
22380	94	94	92	92	97	96	96	95	95	48	47	47	5	ID	34	34	37	35	34	34	34	34	34	33	34	35	34	34	34	34	34	32	32	33	32	33	33	33	33	32	33	35	33	32	34	33	33	33	34
18520-2	98	96	95	95	97	96	96	96	96	49	50	48	34	34	ID	0	18	14	15	15	15	15	15	14	15	14	13	13	13	13	13	13	13	14	13	14	14	14	14	13	14	15	12	13	15	14	12	12	15
18520-1	98	96	95	95	97	96	96	96	96	49	50	48	34	34	0	ID	18	14	15	15	15	15	15	14	15	14	13	13	13	13	13	13	13	14	13	14	14	14	14	13	14	15	12	13	15	14	12	12	15
63	95	95	93	93	97	96	96	95	95	53	54	52	37	37	18	18	ID	11	10	10	10	10	10	9	10	11	10	10	10	10	10	9	9	10	9	10	10	10	10	9	10	12	10	9	11	10	10	10	11
21312	99	97	96	96	100	99	99	99	99	48	49	47	35	35	14	14	11	ID	7	7	7	7	7	6	7	6	5	5	5	5	5	7	7	8	7	8	8	8	8	7	8	9	6	7	9	8	6	6	9
25702-2	100	100	98	98	102	101	101	100	100	50	51	49	34	34	15	15	10	7	ID	2	2	2	2	1	2	3	2	2	2	2	2	6	6	7	6	7	7	7	7	6	7	9	7	6	8	7	7	7	8
25827-2	100	100	98	98	102	101	101	100	100	50	51	49	34	34	15	15	10	7	2	ID	0	0	2	1	2	3	2	2	2	2	2	6	6	7	6	7	7	7	7	6	7	9	7	6	8	7	7	7	8
25827-1	100	100	98	98	102	101	101	100	100	50	51	49	34	34	15	15	10	7	2	0	ID	0	2	1	2	3	2	2	2	2	2	6	6	7	6	7	7	7	7	6	7	9	7	6	8	7	7	7	8
25827-3	100	100	98	98	102	101	101	100	100	50	51	49	34	34	15	15	10	7	2	0	0	ID	2	1	2	3	2	2	2	2	2	6	6	7	6	7	7	7	7	6	7	9	7	6	8	7	7	7	8
2755	100	100	98	98	102	101	101	100	100	50	51	49	34	34	15	15	10	7	2	2	2	2	ID	1	2	3	2	2	2	2	2	6	6	7	6	7	7	7	7	6	7	9	7	6	8	7	7	7	8
22684	99	99	97	97	101	100	100	99	99	49	50	48	33	33	14	14	9	6	1	1	1	1	1	ID	1	2	1	1	1	1	1	5	5	6	5	6	6	6	6	5	6	8	6	5	7	6	6	6	7
22477-1	100	100	98	98	102	101	101	100	100	50	51	49	34	34	15	15	10	7	2	2	2	2	2	1	ID	1	2	2	2	2	2	6	6	7	6	7	7	7	7	6	7	9	7	6	8	7	7	7	8
22477-2	101	99	98	98	102	101	101	101	101	50	51	49	35	35	14	14	11	6	3	3	3	3	3	2	1	ID	1	1	1	1	1	7	7	8	7	8	8	8	8	7	8	9	6	7	9	8	6	6	9
23404-2T	100	98	97	97	101	100	100	100	100	49	50	48	34	34	13	13	10	5	2	2	2	2	2	1	2	1	ID	0	0	0	0	6	6	7	6	7	7	7	7	6	7	8	5	6	8	7	5	5	8
23404-4K	100	98	97	97	101	100	100	100	100	49	50	48	34	34	13	13	10	5	2	2	2	2	2	1	2	1	0	ID	0	0	0	6	6	7	6	7	7	7	7	6	7	8	5	6	8	7	5	5	8
23404-4T	100	98	97	97	101	100	100	100	100	49	50	48	34	34	13	13	10	5	2	2	2	2	2	1	2	1	0	0	ID	0	0	6	6	7	6	7	7	7	7	6	7	8	5	6	8	7	5	5	8
23404-2K	100	98	97	97	101	100	100	100	100	49	50	48	34	34	13	13	10	5	2	2	2	2	2	1	2	1	0	0	0	ID	0	6	6	7	6	7	7	7	7	6	7	8	5	6	8	7	5	5	8
23404	100	98	97	97	101	100	100	100	100	49	50	48	34	34	13	13	10	5	2	2	2	2	2	1	2	1	0	0	0	0	ID	6	6	7	6	7	7	7	7	6	7	8	5	6	8	7	5	5	8
61-1	98	98	96	96	98	97	97	96	96	46	47	45	32	32	13	13	9	7	6	6	6	6	6	5	6	7	6	6	6	6	6	ID	0	3	2	3	3	3	3	2	3	5	3	2	4	3	3	3	4
61-2	98	98	96	96	98	97	97	96	96	46	47	45	32	32	13	13	9	7	6	6	6	6	6	5	6	7	6	6	6	6	6	0	ID	3	2	3	3	3	3	2	3	5	3	2	4	3	3	3	4
785	99	99	97	97	99	98	98	97	97	47	48	46	33	33	14	14	10	8	7	7	7	7	7	6	7	8	7	7	7	7	7	3	3	ID	3	0	0	0	4	3	4	6	4	3	5	4	4	4	5
785	98	98	96	96	98	97	97	96	96	46	47	45	32	32	13	13	9	7	6	6	6	6	6	5	6	7	6	6	6	6	6	2	2	3	ID	3	3	3	3	2	3	5	3	2	4	3	3	3	4
913	99	99	97	97	99	98	98	97	97	47	48	46	33	33	14	14	10	8	7	7	7	7	7	6	7	8	7	7	7	7	7	3	3	0	3	ID	0	0	4	3	4	6	4	3	5	4	4	4	5
913	99	99	97	97	99	98	98	97	97	47	48	46	33	33	14	14	10	8	7	7	7	7	7	6	7	8	7	7	7	7	7	3	3	0	3	0	ID	0	4	3	4	6	4	3	5	4	4	4	5
913	99	99	97	97	99	98	98	97	97	47	48	46	33	33	14	14	10	8	7	7	7	7	7	6	7	8	7	7	7	7	7	3	3	0	3	0	0	ID	4	3	4	6	4	3	5	4	4	4	5
25322-179	99	99	97	97	99	98	98	97	97	45	46	44	33	33	14	14	10	8	7	7	7	7	7	6	7	8	7	7	7	7	7	3	3	4	3	4	4	4	ID	1	2	5	2	1	3	4	4	4	5
25322-205	98	98	96	96	98	97	97	96	96	44	45	43	32	32	13	13	9	7	6	6	6	6	6	5	6	7	6	6	6	6	6	2	2	3	2	3	3	3	1	ID	1	4	1	0	2	3	3	3	4
25322-229	99	99	97	97	99	98	98	97	97	45	46	44	33	33	14	14	10	8	7	7	7	7	7	6	7	8	7	7	7	7	7	3	3	4	3	4	4	4	2	1	ID	5	2	1	3	4	4	4	5
23458-1K	100	99	97	97	100	99	99	99	99	46	47	45	35	35	15	15	12	9	9	9	9	9	9	8	9	9	8	8	8	8	8	5	5	6	5	6	6	6	5	4	5	ID	4	4	6	4	4	4	6
23458-4T	99	97	96	96	98	97	97	97	97	44	45	43	33	33	12	12	10	6	7	7	7	7	7	6	7	6	5	5	5	5	5	3	3	4	3	4	4	4	2	1	2	4	ID	1	3	4	2	2	5
23458-2T	98	98	96	96	98	97	97	96	96	44	45	43	32	32	13	13	9	7	6	6	6	6	6	5	6	7	6	6	6	6	6	2	2	3	2	3	3	3	1	0	1	4	1	ID	2	3	3	3	4
23458-5T	100	100	98	98	100	99	99	98	98	46	47	45	34	34	15	15	11	9	8	8	8	8	8	7	8	9	8	8	8	8	8	4	4	5	4	5	5	5	3	2	3	6	3	2	ID	5	5	5	4
22750	97	97	95	95	99	98	98	97	97	45	46	44	33	33	14	14	10	8	7	7	7	7	7	6	7	8	7	7	7	7	7	3	3	4	3	4	4	4	4	3	4	4	4	3	5	ID	2	2	3
22608-1	97	95	94	94	98	97	97	97	97	44	45	43	33	33	12	12	10	6	7	7	7	7	7	6	7	6	5	5	5	5	5	3	3	4	3	4	4	4	4	3	4	4	2	3	5	2	ID	0	3
22608-2	97	95	94	94	98	97	97	97	97	44	45	43	33	33	12	12	10	6	7	7	7	7	7	6	7	6	5	5	5	5	5	3	3	4	3	4	4	4	4	3	4	4	2	3	5	2	0	ID	3
22608-3T	98	98	96	96	100	99	99	98	98	46	47	45	34	34	15	15	11	9	8	8	8	8	8	7	8	9	8	8	8	8	8	4	4	5	4	5	5	5	5	4	5	6	5	4	4	3	3	3	ID
22608-1T	96	96	94	94	98	97	97	96	96	44	45	43	32	32	13	13	9	7	6	6	6	6	6	5	6	7	6	6	6	6	6	2	2	3	2	3	3	3	3	2	3	4	3	2	4	1	1	1	2
22608-2T	96	96	94	94	98	97	97	96	96	44	45	43	32	32	13	13	9	7	6	6	6	6	6	5	6	7	6	6	6	6	6	2	2	3	2	3	3	3	3	2	3	4	3	2	4	1	1	1	2
23589-3	98	96	95	95	97	96	96	96	96	45	46	44	32	32	11	11	9	5	6	6	6	6	6	5	6	5	4	4	4	4	4	2	2	3	2	3	3	3	3	2	3	4	1	2	4	3	1	1	4
23589-1T	98	96	95	95	97	96	96	96	96	45	46	44	32	32	11	11	9	5	6	6	6	6	6	5	6	5	4	4	4	4	4	2	2	3	2	3	3	3	3	2	3	4	1	2	4	3	1	1	4
23589-4	98	96	95	95	97	96	96	96	96	45	46	44	32	32	11	11	9	5	6	6	6	6	6	5	6	5	4	4	4	4	4	2	2	3	2	3	3	3	3	2	3	4	1	2	4	3	1	1	4
23589-1T	98	96	95	95	97	96	96	96	96	45	46	44	32	32	11	11	9	5	6	6	6	6	6	5	6	5	4	4	4	4	4	2	2	3	2	3	3	3	3	2	3	4	1	2	4	3	1	1	4
22224-2T	98	96	95	95	97	96	96	96	96	45	46	44	32	32	11	11	9	5	6	6	6	6	6	5	6	5	4	4	4	4	4	2	2	3	2	3	3	3	3	2	3	4	1	2	4	3	1	1	4
22224-4T	98	96	95	95	97	96	96	96	96	45	46	44	32	32	11	11	9	5	6	6	6	6	6	5	6	5	4	4	4	4	4	2	2	3	2	3	3	3	3	2	3	4	1	2	4	3	1	1	4
22224-3K	98	96	95	95	97	96	96	96	96	45	46	44	32	32	11	11	9	5	6	6	6	6	6	5	6	5	4	4	4	4	4	2	2	3	2	3	3	3	3	2	3	4	1	2	4	3	1	1	4
22224-3T	98	96	95	95	97	96	96	96	96	45	46	44	32	32	11	11	9	5	6	6	6	6	6	5	6	5	4	4	4	4	4	2	2	3	2	3	3	3	3	2	3	4	1	2	4	3	1	1	4
[truncated: 70 more columns]

## Sheet: N1
Sequence Identity Matrix
N1-nt	20689-27T	20689-28T	18520-2	18520-1	22380	25690	2968	8028-1	8028-2	23608-1K	23608	25338-1	23609	25338-2	63	21312	3306-1	3306-2	23404-2K	23404-2T	23404-4T	23404-4K	23404	2755	22477-1	22477-2	25702-2	25827-1	25827-2	22684	25827-3	61-1	61-2	785	913	913	913	785	25322-205	25322-179	25322-229	22224-2T	22750	23458-1K	22224-3T	22224-4T	23589-1T	22608-1	23589-3
20689-27T	ID	0.997	0.953	0.954	0.954	0.954	0.953	0.951	0.954	0.954	0.954	0.955	0.955	0.955	0.954	0.953	0.954	0.954	0.954	0.954	0.954	0.954	0.954	0.952	0.953	0.953	0.954	0.954	0.954	0.954	0.954	0.954	0.953	0.952	0.952	0.952	0.952	0.952	0.952	0.952	0.952	0.952	0.952	0.952	0.953	0.953	0.953	0.953	0.953
20689-28T	0.997	ID	0.952	0.954	0.953	0.953	0.952	0.95	0.953	0.953	0.954	0.954	0.954	0.954	0.953	0.952	0.954	0.954	0.954	0.953	0.953	0.953	0.953	0.952	0.952	0.952	0.953	0.953	0.953	0.953	0.953	0.953	0.952	0.952	0.952	0.952	0.952	0.952	0.952	0.952	0.952	0.952	0.952	0.952	0.952	0.952	0.952	0.952	0.952
18520-2	0.953	0.952	ID	0.998	0.982	0.983	0.981	0.978	0.982	0.983	0.983	0.984	0.984	0.984	0.982	0.983	0.984	0.984	0.983	0.983	0.983	0.983	0.983	0.982	0.983	0.983	0.983	0.983	0.983	0.983	0.983	0.982	0.981	0.982	0.982	0.982	0.982	0.982	0.982	0.982	0.982	0.982	0.982	0.982	0.983	0.983	0.983	0.983	0.983
18520-1	0.954	0.954	0.998	ID	0.983	0.985	0.983	0.98	0.983	0.984	0.985	0.985	0.985	0.985	0.983	0.984	0.985	0.985	0.984	0.984	0.985	0.985	0.985	0.983	0.984	0.984	0.985	0.985	0.985	0.985	0.985	0.983	0.983	0.983	0.983	0.983	0.983	0.983	0.983	0.983	0.983	0.983	0.983	0.983	0.984	0.984	0.984	0.984	0.984
22380	0.954	0.953	0.982	0.983	ID	0.997	0.99	0.988	0.991	0.991	0.992	0.992	0.992	0.992	0.991	0.992	0.993	0.993	0.992	0.992	0.992	0.992	0.992	0.991	0.992	0.992	0.992	0.992	0.992	0.992	0.992	0.991	0.99	0.991	0.991	0.991	0.991	0.991	0.991	0.991	0.991	0.991	0.991	0.991	0.992	0.992	0.992	0.992	0.992
25690	0.954	0.953	0.983	0.985	0.997	ID	0.99	0.988	0.991	0.991	0.992	0.992	0.992	0.992	0.991	0.992	0.993	0.993	0.992	0.992	0.992	0.992	0.992	0.991	0.992	0.992	0.992	0.992	0.992	0.992	0.992	0.991	0.99	0.991	0.991	0.991	0.991	0.991	0.991	0.991	0.991	0.991	0.991	0.991	0.992	0.992	0.992	0.992	0.992
2968	0.953	0.952	0.981	0.983	0.99	0.99	ID	0.994	0.997	0.993	0.994	0.995	0.995	0.995	0.993	0.994	0.995	0.995	0.994	0.994	0.995	0.995	0.995	0.993	0.994	0.994	0.995	0.995	0.995	0.995	0.995	0.992	0.991	0.992	0.992	0.992	0.992	0.992	0.992	0.992	0.992	0.992	0.992	0.992	0.992	0.992	0.992	0.992	0.992
8028-1	0.951	0.95	0.978	0.98	0.988	0.988	0.994	ID	0.995	0.99	0.991	0.992	0.992	0.992	0.99	0.991	0.992	0.992	0.991	0.991	0.992	0.992	0.992	0.99	0.991	0.991	0.992	0.992	0.992	0.992	0.992	0.989	0.988	0.989	0.989	0.989	0.989	0.989	0.989	0.989	0.989	0.989	0.989	0.989	0.99	0.99	0.99	0.99	0.99
8028-2	0.954	0.953	0.982	0.983	0.991	0.991	0.997	0.995	ID	0.992	0.993	0.994	0.994	0.994	0.992	0.993	0.995	0.995	0.993	0.993	0.994	0.994	0.994	0.992	0.993	0.993	0.994	0.994	0.994	0.994	0.994	0.992	0.992	0.992	0.992	0.992	0.992	0.992	0.992	0.992	0.992	0.992	0.992	0.992	0.993	0.993	0.993	0.993	0.993
23608-1K	0.954	0.953	0.983	0.984	0.991	0.991	0.993	0.99	0.992	ID	0.998	0.998	0.998	0.998	0.994	0.995	0.996	0.996	0.995	0.995	0.995	0.995	0.995	0.994	0.995	0.995	0.995	0.995	0.995	0.995	0.995	0.992	0.992	0.992	0.992	0.992	0.992	0.992	0.992	0.992	0.992	0.992	0.992	0.992	0.993	0.993	0.993	0.993	0.993
23608	0.954	0.954	0.983	0.985	0.992	0.992	0.994	0.991	0.993	0.998	ID	0.999	0.999	0.999	0.995	0.995	0.997	0.997	0.995	0.995	0.996	0.996	0.996	0.995	0.995	0.995	0.996	0.996	0.996	0.996	0.996	0.993	0.992	0.993	0.993	0.993	0.993	0.993	0.993	0.993	0.993	0.993	0.993	0.993	0.994	0.994	0.994	0.994	0.994
25338-1	0.955	0.954	0.984	0.985	0.992	0.992	0.995	0.992	0.994	0.998	0.999	ID	1	1	0.995	0.996	0.997	0.997	0.996	0.996	0.997	0.997	0.997	0.995	0.996	0.996	0.997	0.997	0.997	0.997	0.997	0.994	0.993	0.994	0.994	0.994	0.994	0.994	0.994	0.994	0.994	0.994	0.994	0.994	0.995	0.995	0.995	0.995	0.995
23609	0.955	0.954	0.984	0.985	0.992	0.992	0.995	0.992	0.994	0.998	0.999	1	ID	1	0.995	0.996	0.997	0.997	0.996	0.996	0.997	0.997	0.997	0.995	0.996	0.996	0.997	0.997	0.997	0.997	0.997	0.994	0.993	0.994	0.994	0.994	0.994	0.994	0.994	0.994	0.994	0.994	0.994	0.994	0.995	0.995	0.995	0.995	0.995
25338-2	0.955	0.954	0.984	0.985	0.992	0.992	0.995	0.992	0.994	0.998	0.999	1	1	ID	0.995	0.996	0.997	0.997	0.996	0.996	0.997	0.997	0.997	0.995	0.996	0.996	0.997	0.997	0.997	0.997	0.997	0.994	0.993	0.994	0.994	0.994	0.994	0.994	0.994	0.994	0.994	0.994	0.994	0.994	0.995	0.995	0.995	0.995	0.995
63	0.954	0.953	0.982	0.983	0.991	0.991	0.993	0.99	0.992	0.994	0.995	0.995	0.995	0.995	ID	0.995	0.996	0.996	0.995	0.995	0.995	0.995	0.995	0.994	0.995	0.995	0.995	0.995	0.995	0.995	0.995	0.992	0.992	0.992	0.992	0.992	0.992	0.992	0.992	0.992	0.992	0.992	0.992	0.992	0.993	0.993	0.993	0.993	0.993
21312	0.953	0.952	0.983	0.984	0.992	0.992	0.994	0.991	0.993	0.995	0.995	0.996	0.996	0.996	0.995	ID	0.998	0.998	0.997	0.997	0.997	0.997	0.997	0.996	0.997	0.997	0.997	0.997	0.997	0.997	0.997	0.993	0.992	0.993	0.993	0.993	0.993	0.993	0.993	0.993	0.993	0.993	0.993	0.993	0.994	0.994	0.994	0.994	0.994
3306-1	0.954	0.954	0.984	0.985	0.993	0.993	0.995	0.992	0.995	0.996	0.997	0.997	0.997	0.997	0.996	0.998	ID	1	0.998	0.998	0.999	0.999	0.999	0.997	0.998	0.998	0.999	0.999	0.999	0.999	0.999	0.995	0.994	0.995	0.995	0.995	0.995	0.995	0.995	0.995	0.995	0.995	0.995	0.995	0.995	0.995	0.995	0.995	0.995
3306-2	0.954	0.954	0.984	0.985	0.993	0.993	0.995	0.992	0.995	0.996	0.997	0.997	0.997	0.997	0.996	0.998	1	ID	0.998	0.998	0.999	0.999	0.999	0.997	0.998	0.998	0.999	0.999	0.999	0.999	0.999	0.995	0.994	0.995	0.995	0.995	0.995	0.995	0.995	0.995	0.995	0.995	0.995	0.995	0.995	0.995	0.995	0.995	0.995
23404-2K	0.954	0.954	0.983	0.984	0.992	0.992	0.994	0.991	0.993	0.995	0.995	0.996	0.996	0.996	0.995	0.997	0.998	0.998	ID	0.999	0.999	0.999	0.999	0.996	0.997	0.997	0.997	0.997	0.997	0.997	0.997	0.993	0.992	0.993	0.993	0.993	0.993	0.993	0.993	0.993	0.993	0.993	0.993	0.993	0.994	0.994	0.994	0.994	0.994
23404-2T	0.954	0.953	0.983	0.984	0.992	0.992	0.994	0.991	0.993	0.995	0.995	0.996	0.996	0.996	0.995	0.997	0.998	0.998	0.999	ID	0.999	0.999	0.999	0.996	0.997	0.997	0.997	0.997	0.997	0.997	0.997	0.993	0.992	0.993	0.993	0.993	0.993	0.993	0.993	0.993	0.993	0.993	0.993	0.993	0.994	0.994	0.994	0.994	0.994
23404-4T	0.954	0.953	0.983	0.985	0.992	0.992	0.995	0.992	0.994	0.995	0.996	0.997	0.997	0.997	0.995	0.997	0.999	0.999	0.999	0.999	ID	1	1	0.997	0.997	0.997	0.998	0.998	0.998	0.998	0.998	0.994	0.993	0.994	0.994	0.994	0.994	0.994	0.994	0.994	0.994	0.994	0.994	0.994	0.995	0.995	0.995	0.995	0.995
23404-4K	0.954	0.953	0.983	0.985	0.992	0.992	0.995	0.992	0.994	0.995	0.996	0.997	0.997	0.997	0.995	0.997	0.999	0.999	0.999	0.999	1	ID	1	0.997	0.997	0.997	0.998	0.998	0.998	0.998	0.998	0.994	0.993	0.994	0.994	0.994	0.994	0.994	0.994	0.994	0.994	0.994	0.994	0.994	0.995	0.995	0.995	0.995	0.995
23404	0.954	0.953	0.983	0.985	0.992	0.992	0.995	0.992	0.994	0.995	0.996	0.997	0.997	0.997	0.995	0.997	0.999	0.999	0.999	0.999	1	1	ID	0.997	0.997	0.997	0.998	0.998	0.998	0.998	0.998	0.994	0.993	0.994	0.994	0.994	0.994	0.994	0.994	0.994	0.994	0.994	0.994	0.994	0.995	0.995	0.995	0.995	0.995
2755	0.952	0.952	0.982	0.983	0.991	0.991	0.993	0.99	0.992	0.994	0.995	0.995	0.995	0.995	0.994	0.996	0.997	0.997	0.996	0.996	0.997	0.997	0.997	ID	0.997	0.997	0.998	0.998	0.998	0.998	0.998	0.992	0.992	0.992	0.992	0.992	0.992	0.992	0.992	0.992	0.992	0.992	0.992	0.992	0.993	0.993	0.993	0.993	0.993
22477-1	0.953	0.952	0.983	0.984	0.992	0.992	0.994	0.991	0.993	0.995	0.995	0.996	0.996	0.996	0.995	0.997	0.998	0.998	0.997	0.997	0.997	0.997	0.997	0.997	ID	0.999	0.999	0.999	0.999	0.999	0.999	0.993	0.992	0.993	0.993	0.993	0.993	0.993	0.993	0.993	0.993	0.993	0.993	0.993	0.994	0.994	0.994	0.994	0.994
22477-2	0.953	0.952	0.983	0.984	0.992	0.992	0.994	0.991	0.993	0.995	0.995	0.996	0.996	0.996	0.995	0.997	0.998	0.998	0.997	0.997	0.997	0.997	0.997	0.997	0.999	ID	0.999	0.999	0.999	0.999	0.999	0.993	0.992	0.993	0.993	0.993	0.993	0.993	0.993	0.993	0.993	0.993	0.993	0.993	0.994	0.994	0.994	0.994	0.994
25702-2	0.954	0.953	0.983	0.985	0.992	0.992	0.995	0.992	0.994	0.995	0.996	0.997	0.997	0.997	0.995	0.997	0.999	0.999	0.997	0.997	0.998	0.998	0.998	0.998	0.999	0.999	ID	1	1	1	1	0.994	0.993	0.994	0.994	0.994	0.994	0.994	0.994	0.994	0.994	0.994	0.994	0.994	0.995	0.995	0.995	0.995	0.995
25827-1	0.954	0.953	0.983	0.985	0.992	0.992	0.995	0.992	0.994	0.995	0.996	0.997	0.997	0.997	0.995	0.997	0.999	0.999	0.997	0.997	0.998	0.998	0.998	0.998	0.999	0.999	1	ID	1	1	1	0.994	0.993	0.994	0.994	0.994	0.994	0.994	0.994	0.994	0.994	0.994	0.994	0.994	0.995	0.995	0.995	0.995	0.995
25827-2	0.954	0.953	0.983	0.985	0.992	0.992	0.995	0.992	0.994	0.995	0.996	0.997	0.997	0.997	0.995	0.997	0.999	0.999	0.997	0.997	0.998	0.998	0.998	0.998	0.999	0.999	1	1	ID	1	1	0.994	0.993	0.994	0.994	0.994	0.994	0.994	0.994	0.994	0.994	0.994	0.994	0.994	0.995	0.995	0.995	0.995	0.995
22684	0.954	0.953	0.983	0.985	0.992	0.992	0.995	0.992	0.994	0.995	0.996	0.997	0.997	0.997	0.995	0.997	0.999	0.999	0.997	0.997	0.998	0.998	0.998	0.998	0.999	0.999	1	1	1	ID	1	0.994	0.993	0.994	0.994	0.994	0.994	0.994	0.994	0.994	0.994	0.994	0.994	0.994	0.995	0.995	0.995	0.995	0.995
25827-3	0.954	0.953	0.983	0.985	0.992	0.992	0.995	0.992	0.994	0.995	0.996	0.997	0.997	0.997	0.995	0.997	0.999	0.999	0.997	0.997	0.998	0.998	0.998	0.998	0.999	0.999	1	1	1	1	ID	0.994	0.993	0.994	0.994	0.994	0.994	0.994	0.994	0.994	0.994	0.994	0.994	0.994	0.995	0.995	0.995	0.995	0.995
61-1	0.954	0.953	0.982	0.983	0.991	0.991	0.992	0.989	0.992	0.992	0.993	0.994	0.994	0.994	0.992	0.993	0.995	0.995	0.993	0.993	0.994	0.994	0.994	0.992	0.993	0.993	0.994	0.994	0.994	0.994	0.994	ID	0.999	0.994	0.994	0.994	0.994	0.994	0.994	0.994	0.994	0.994	0.994	0.994	0.995	0.995	0.995	0.995	0.995
61-2	0.953	0.952	0.981	0.983	0.99	0.99	0.991	0.988	0.992	0.992	0.992	0.993	0.993	0.993	0.992	0.992	0.994	0.994	0.992	0.992	0.993	0.993	0.993	0.992	0.992	0.992	0.993	0.993	0.993	0.993	0.993	0.999	ID	0.993	0.993	0.993	0.993	0.993	0.993	0.993	0.993	0.993	0.993	0.993	0.994	0.994	0.994	0.994	0.994
785	0.952	0.952	0.982	0.983	0.991	0.991	0.992	0.989	0.992	0.992	0.993	0.994	0.994	0.994	0.992	0.993	0.995	0.995	0.993	0.993	0.994	0.994	0.994	0.992	0.993	0.993	0.994	0.994	0.994	0.994	0.994	0.994	0.993	ID	1	1	1	0.995	0.995	0.995	0.995	0.995	0.995	0.995	0.996	0.996	0.996	0.996	0.996
913	0.952	0.952	0.982	0.983	0.991	0.991	0.992	0.989	0.992	0.992	0.993	0.994	0.994	0.994	0.992	0.993	0.995	0.995	0.993	0.993	0.994	0.994	0.994	0.992	0.993	0.993	0.994	0.994	0.994	0.994	0.994	0.994	0.993	1	ID	1	1	0.995	0.995	0.995	0.995	0.995	0.995	0.995	0.996	0.996	0.996	0.996	0.996
913	0.952	0.952	0.982	0.983	0.991	0.991	0.992	0.989	0.992	0.992	0.993	0.994	0.994	0.994	0.992	0.993	0.995	0.995	0.993	0.993	0.994	0.994	0.994	0.992	0.993	0.993	0.994	0.994	0.994	0.994	0.994	0.994	0.993	1	1	ID	1	0.995	0.995	0.995	0.995	0.995	0.995	0.995	0.996	0.996	0.996	0.996	0.996
913	0.952	0.952	0.982	0.983	0.991	0.991	0.992	0.989	0.992	0.992	0.993	0.994	0.994	0.994	0.992	0.993	0.995	0.995	0.993	0.993	0.994	0.994	0.994	0.992	0.993	0.993	0.994	0.994	0.994	0.994	0.994	0.994	0.993	1	1	1	ID	0.995	0.995	0.995	0.995	0.995	0.995	0.995	0.996	0.996	0.996	0.996	0.996
785	0.952	0.952	0.982	0.983	0.991	0.991	0.992	0.989	0.992	0.992	0.993	0.994	0.994	0.994	0.992	0.993	0.995	0.995	0.993	0.993	0.994	0.994	0.994	0.992	0.993	0.993	0.994	0.994	0.994	0.994	0.994	0.994	0.993	0.995	0.995	0.995	0.995	ID	0.995	0.995	0.995	0.995	0.995	0.995	0.996	0.996	0.996	0.996	0.996
25322-205	0.952	0.952	0.982	0.983	0.991	0.991	0.992	0.989	0.992	0.992	0.993	0.994	0.994	0.994	0.992	0.993	0.995	0.995	0.993	0.993	0.994	0.994	0.994	0.992	0.993	0.993	0.994	0.994	0.994	0.994	0.994	0.994	0.993	0.995	0.995	0.995	0.995	0.995	ID	1	1	0.998	0.998	0.998	0.999	0.999	0.999	0.999	0.999
25322-179	0.952	0.952	0.982	0.983	0.991	0.991	0.992	0.989	0.992	0.992	0.993	0.994	0.994	0.994	0.992	0.993	0.995	0.995	0.993	0.993	0.994	0.994	0.994	0.992	0.993	0.993	0.994	0.994	0.994	0.994	0.994	0.994	0.993	0.995	0.995	0.995	0.995	0.995	1	ID	1	0.998	0.998	0.998	0.999	0.999	0.999	0.999	0.999
25322-229	0.952	0.952	0.982	0.983	0.991	0.991	0.992	0.989	0.992	0.992	0.993	0.994	0.994	0.994	0.992	0.993	0.995	0.995	0.993	0.993	0.994	0.994	0.994	0.992	0.993	0.993	0.994	0.994	0.994	0.994	0.994	0.994	0.993	0.995	0.995	0.995	0.995	0.995	1	1	ID	0.998	0.998	0.998	0.999	0.999	0.999	0.999	0.999
22224-2T	0.952	0.952	0.982	0.983	0.991	0.991	0.992	0.989	0.992	0.992	0.993	0.994	0.994	0.994	0.992	0.993	0.995	0.995	0.993	0.993	0.994	0.994	0.994	0.992	0.993	0.993	0.994	0.994	0.994	0.994	0.994	0.994	0.993	0.995	0.995	0.995	0.995	0.995	0.998	0.998	0.998	ID	0.998	0.998	0.999	0.999	0.999	0.999	0.999
22750	0.952	0.952	0.982	0.983	0.991	0.991	0.992	0.989	0.992	0.992	0.993	0.994	0.994	0.994	0.992	0.993	0.995	0.995	0.993	0.993	0.994	0.994	0.994	0.992	0.993	0.993	0.994	0.994	0.994	0.994	0.994	0.994	0.993	0.995	0.995	0.995	0.995	0.995	0.998	0.998	0.998	0.998	ID	0.999	0.999	0.999	0.999	0.999	0.999
23458-1K	0.952	0.952	0.982	0.983	0.991	0.991	0.992	0.989	0.992	0.992	0.993	0.994	0.994	0.994	0.992	0.993	0.995	0.995	0.993	0.993	0.994	0.994	0.994	0.992	0.993	0.993	0.994	0.994	0.994	0.994	0.994	0.994	0.993	0.995	0.995	0.995	0.995	0.995	0.998	0.998	0.998	0.998	0.999	ID	0.999	0.999	0.999	0.999	0.999
22224-3T	0.953	0.952	0.983	0.984	0.992	0.992	0.992	0.99	0.993	0.993	0.994	0.995	0.995	0.995	0.993	0.994	0.995	0.995	0.994	0.994	0.995	0.995	0.995	0.993	0.994	0.994	0.995	0.995	0.995	0.995	0.995	0.995	0.994	0.996	0.996	0.996	0.996	0.996	0.999	0.999	0.999	0.999	0.999	0.999	ID	1	1	1	1
22224-4T	0.953	0.952	0.983	0.984	0.992	0.992	0.992	0.99	0.993	0.993	0.994	0.995	0.995	0.995	0.993	0.994	0.995	0.995	0.994	0.994	0.995	0.995	0.995	0.993	0.994	0.994	0.995	0.995	0.995	0.995	0.995	0.995	0.994	0.996	0.996	0.996	0.996	0.996	0.999	0.999	0.999	0.999	0.999	0.999	1	ID	1	1	1
23589-1T	0.953	0.952	0.983	0.984	0.992	0.992	0.992	0.99	0.993	0.993	0.994	0.995	0.995	0.995	0.993	0.994	0.995	0.995	0.994	0.994	0.995	0.995	0.995	0.993	0.994	0.994	0.995	0.995	0.995	0.995	0.995	0.995	0.994	0.996	0.996	0.996	0.996	0.996	0.999	0.999	0.999	0.999	0.999	0.999	1	1	ID	1	1
22608-1	0.953	0.952	0.983	0.984	0.992	0.992	0.992	0.99	0.993	0.993	0.994	0.995	0.995	0.995	0.993	0.994	0.995	0.995	0.994	0.994	0.995	0.995	0.995	0.993	0.994	0.994	0.995	0.995	0.995	0.995	0.995	0.995	0.994	0.996	0.996	0.996	0.996	0.996	0.999	0.999	0.999	0.999	0.999	0.999	1	1	1	ID	1
23589-3	0.953	0.952	0.983	0.984	0.992	0.992	0.992	0.99	0.993	0.993	0.994	0.995	0.995	0.995	0.993	0.994	0.995	0.995	0.994	0.994	0.995	0.995	0.995	0.993	0.994	0.994	0.995	0.995	0.995	0.995	0.995	0.995	0.994	0.996	0.996	0.996	0.996	0.996	0.999	0.999	0.999	0.999	0.999	0.999	1	1	1	1	ID
22608-3T	0.953	0.952	0.983	0.984	0.992	0.992	0.992	0.99	0.993	0.993	0.994	0.995	0.995	0.995	0.993	0.994	0.995	0.995	0.994	0.994	0.995	0.995	0.995	0.993	0.994	0.994	0.995	0.995	0.995	0.995	0.995	0.995	0.994	0.996	0.996	0.996	0.996	0.996	0.999	0.999	0.999	0.999	0.999	0.999	1	1	1	1	1
23458-4T	0.953	0.952	0.983	0.984	0.992	0.992	0.992	0.99	0.993	0.993	0.994	0.995	0.995	0.995	0.993	0.994	0.995	0.995	0.994	0.994	0.995	0.995	0.995	0.993	0.994	0.994	0.995	0.995	0.995	0.995	0.995	0.995	0.994	0.996	0.996	0.996	0.996	0.996	0.999	0.999	0.999	0.999	0.999	0.999	1	1	1	1	1
22608-1T	0.953	0.952	0.983	0.984	0.992	0.992	0.992	0.99	0.993	0.993	0.994	0.995	0.995	0.995	0.993	0.994	0.995	0.995	0.994	0.994	0.995	0.995	0.995	0.993	0.994	0.994	0.995	0.995	0.995	0.995	0.995	0.995	0.994	0.996	0.996	0.996	0.996	0.996	0.999	0.999	0.999	0.999	0.999	0.999	1	1	1	1	1
23589-1T	0.953	0.952	0.983	0.984	0.992	0.992	0.992	0.99	0.993	0.993	0.994	0.995	0.995	0.995	0.993	0.994	0.995	0.995	0.994	0.994	0.995	0.995	0.995	0.993	0.994	0.994	0.995	0.995	0.995	0.995	0.995	0.995	0.994	0.996	0.996	0.996	0.996	0.996	0.999	0.999	0.999	0.999	0.999	0.999	1	1	1	1	1
23458-5T	0.953	0.952	0.983	0.984	0.992	0.992	0.992	0.99	0.993	0.993	0.994	0.995	0.995	0.995	0.993	0.994	0.995	0.995	0.994	0.994	0.995	0.995	0.995	0.993	0.994	0.994	0.995	0.995	0.995	0.995	0.995	0.995	0.994	0.996	0.996	0.996	0.996	0.996	0.999	0.999	0.999	0.999	0.999	0.999	1	1	1	1	1
23589-4	0.953	0.952	0.983	0.984	0.992	0.992	0.992	0.99	0.993	0.993	0.994	0.995	0.995	0.995	0.993	0.994	0.995	0.995	0.994	0.994	0.995	0.995	0.995	0.993	0.994	0.994	0.995	0.995	0.995	0.995	0.995	0.995	0.994	0.996	0.996	0.996	0.996	0.996	0.999	0.999	0.999	0.999	0.999	0.999	1	1	1	1	1
23458-2T	0.953	0.952	0.983	0.984	0.992	0.992	0.992	0.99	0.993	0.993	0.994	0.995	0.995	0.995	0.993	0.994	0.995	0.995	0.994	0.994	0.995	0.995	0.995	0.993	0.994	0.994	0.995	0.995	0.995	0.995	0.995	0.995	0.994	0.996	0.996	0.996	0.996	0.996	0.999	0.999	0.999	0.999	0.999	0.999	1	1	1	1	1
22608-2	0.953	0.952	0.983	0.984	0.992	0.992	0.992	0.99	0.993	0.993	0.994	0.995	0.995	0.995	0.993	0.994	0.995	0.995	0.994	0.994	0.995	0.995	0.995	0.993	0.994	0.994	0.995	0.995	0.995	0.995	0.995	0.995	0.994	0.996	0.996	0.996	0.996	0.996	0.999	0.999	0.999	0.999	0.999	0.999	1	1	1	1	1
22224-3K	0.953	0.952	0.983	0.984	0.992	0.992	0.992	0.99	0.993	0.993	0.994	0.995	0.995	0.995	0.993	0.994	0.995	0.995	0.994	0.994	0.995	0.995	0.995	0.993	0.994	0.994	0.995	0.995	0.995	0.995	0.995	0.995	0.994	0.996	0.996	0.996	0.996	0.996	0.999	0.999	0.999	0.999	0.999	0.999	1	1	1	1	1
22608-2T	0.953	0.952	0.983	0.984	0.992	0.992	0.992	0.99	0.993	0.993	0.994	0.995	0.995	0.995	0.993	0.994	0.995	0.995	0.994	0.994	0.995	0.995	0.995	0.993	0.994	0.994	0.995	0.995	0.995	0.995	0.995	0.995	0.994	0.996	0.996	0.996	0.996	0.996	0.999	0.999	0.999	0.999	0.999	0.999	1	1	1	1	1
Sequence Difference Count Matrix
N1-nt	20689-27T	20689-28T	18520-2	18520-1	22380	25690	2968	8028-1	8028-2	23608-1K	23608	25338-1	23609	25338-2	63	21312	3306-1	3306-2	23404-2K	23404-2T	23404-4T	23404-4K	23404	2755	22477-1	22477-2	25702-2	25827-1	25827-2	22684	25827-3	61-1	61-2	785	913	913	913	785	25322-205	25322-179	25322-229	22224-2T	22750	23458-1K	22224-3T	22224-4T	23589-1T	22608-1	23589-3
20689-27T	ID	4	66	64	65	65	66	69	65	65	64	63	63	63	65	66	64	64	64	65	65	65	65	67	66	66	65	65	65	65	65	65	66	67	67	67	67	67	67	67	67	67	67	67	66	66	66	66	66
20689-28T	4	ID	67	65	66	66	67	70	66	66	65	64	64	64	66	67	65	65	65	66	66	66	66	68	67	67	66	66	66	66	66	66	67	68	68	68	68	68	68	68	68	68	68	68	67	67	67	67	67
18520-2	66	67	ID	2	25	23	26	30	25	24	23	22	22	22	25	24	22	22	24	24	23	23	23	25	24	24	23	23	23	23	23	25	26	25	25	25	25	25	25	25	25	25	25	25	24	24	24	24	24
18520-1	64	65	2	ID	23	21	24	28	23	22	21	20	20	20	23	22	20	20	22	22	21	21	21	23	22	22	21	21	21	21	21	23	24	23	23	23	23	23	23	23	23	23	23	23	22	22	22	22	22
22380	65	66	25	23	ID	4	13	17	12	12	11	10	10	10	12	11	9	9	11	11	10	10	10	12	11	11	10	10	10	10	10	12	13	12	12	12	12	12	12	12	12	12	12	12	11	11	11	11	11
25690	65	66	23	21	4	ID	13	17	12	12	11	10	10	10	12	11	9	9	11	11	10	10	10	12	11	11	10	10	10	10	10	12	13	12	12	12	12	12	12	12	12	12	12	12	11	11	11	11	11
2968	66	67	26	24	13	13	ID	8	3	9	8	7	7	7	9	8	6	6	8	8	7	7	7	9	8	8	7	7	7	7	7	11	12	11	11	11	11	11	11	11	11	11	11	11	10	10	10	10	10
8028-1	69	70	30	28	17	17	8	ID	7	13	12	11	11	11	13	12	10	10	12	12	11	11	11	13	12	12	11	11	11	11	11	15	16	15	15	15	15	15	15	15	15	15	15	15	14	14	14	14	14
8028-2	65	66	25	23	12	12	3	7	ID	10	9	8	8	8	10	9	7	7	9	9	8	8	8	10	9	9	8	8	8	8	8	10	11	10	10	10	10	10	10	10	10	10	10	10	9	9	9	9	9
23608-1K	65	66	24	22	12	12	9	13	10	ID	2	2	2	2	8	7	5	5	7	7	6	6	6	8	7	7	6	6	6	6	6	10	11	10	10	10	10	10	10	10	10	10	10	10	9	9	9	9	9
23608	64	65	23	21	11	11	8	12	9	2	ID	1	1	1	7	6	4	4	6	6	5	5	5	7	6	6	5	5	5	5	5	9	10	9	9	9	9	9	9	9	9	9	9	9	8	8	8	8	8
25338-1	63	64	22	20	10	10	7	11	8	2	1	ID	0	0	6	5	3	3	5	5	4	4	4	6	5	5	4	4	4	4	4	8	9	8	8	8	8	8	8	8	8	8	8	8	7	7	7	7	7
23609	63	64	22	20	10	10	7	11	8	2	1	0	ID	0	6	5	3	3	5	5	4	4	4	6	5	5	4	4	4	4	4	8	9	8	8	8	8	8	8	8	8	8	8	8	7	7	7	7	7
25338-2	63	64	22	20	10	10	7	11	8	2	1	0	0	ID	6	5	3	3	5	5	4	4	4	6	5	5	4	4	4	4	4	8	9	8	8	8	8	8	8	8	8	8	8	8	7	7	7	7	7
63	65	66	25	23	12	12	9	13	10	8	7	6	6	6	ID	7	5	5	7	7	6	6	6	8	7	7	6	6	6	6	6	10	11	10	10	10	10	10	10	10	10	10	10	10	9	9	9	9	9
21312	66	67	24	22	11	11	8	12	9	7	6	5	5	5	7	ID	2	2	4	4	3	3	3	5	4	4	3	3	3	3	3	9	10	9	9	9	9	9	9	9	9	9	9	9	8	8	8	8	8
3306-1	64	65	22	20	9	9	6	10	7	5	4	3	3	3	5	2	ID	0	2	2	1	1	1	3	2	2	1	1	1	1	1	7	8	7	7	7	7	7	7	7	7	7	7	7	6	6	6	6	6
3306-2	64	65	22	20	9	9	6	10	7	5	4	3	3	3	5	2	0	ID	2	2	1	1	1	3	2	2	1	1	1	1	1	7	8	7	7	7	7	7	7	7	7	7	7	7	6	6	6	6	6
23404-2K	64	65	24	22	11	11	8	12	9	7	6	5	5	5	7	4	2	2	ID	1	1	1	1	5	4	4	3	3	3	3	3	9	10	9	9	9	9	9	9	9	9	9	9	9	8	8	8	8	8
23404-2T	65	66	24	22	11	11	8	12	9	7	6	5	5	5	7	4	2	2	1	ID	1	1	1	5	4	4	3	3	3	3	3	9	10	9	9	9	9	9	9	9	9	9	9	9	8	8	8	8	8
23404-4T	65	66	23	21	10	10	7	11	8	6	5	4	4	4	6	3	1	1	1	1	ID	0	0	4	3	3	2	2	2	2	2	8	9	8	8	8	8	8	8	8	8	8	8	8	7	7	7	7	7
23404-4K	65	66	23	21	10	10	7	11	8	6	5	4	4	4	6	3	1	1	1	1	0	ID	0	4	3	3	2	2	2	2	2	8	9	8	8	8	8	8	8	8	8	8	8	8	7	7	7	7	7
23404	65	66	23	21	10	10	7	11	8	6	5	4	4	4	6	3	1	1	1	1	0	0	ID	4	3	3	2	2	2	2	2	8	9	8	8	8	8	8	8	8	8	8	8	8	7	7	7	7	7
2755	67	68	25	23	12	12	9	13	10	8	7	6	6	6	8	5	3	3	5	5	4	4	4	ID	3	3	2	2	2	2	2	10	11	10	10	10	10	10	10	10	10	10	10	10	9	9	9	9	9
22477-1	66	67	24	22	11	11	8	12	9	7	6	5	5	5	7	4	2	2	4	4	3	3	3	3	ID	1	1	1	1	1	1	9	10	9	9	9	9	9	9	9	9	9	9	9	8	8	8	8	8
22477-2	66	67	24	22	11	11	8	12	9	7	6	5	5	5	7	4	2	2	4	4	3	3	3	3	1	ID	1	1	1	1	1	9	10	9	9	9	9	9	9	9	9	9	9	9	8	8	8	8	8
25702-2	65	66	23	21	10	10	7	11	8	6	5	4	4	4	6	3	1	1	3	3	2	2	2	2	1	1	ID	0	0	0	0	8	9	8	8	8	8	8	8	8	8	8	8	8	7	7	7	7	7
25827-1	65	66	23	21	10	10	7	11	8	6	5	4	4	4	6	3	1	1	3	3	2	2	2	2	1	1	0	ID	0	0	0	8	9	8	8	8	8	8	8	8	8	8	8	8	7	7	7	7	7
25827-2	65	66	23	21	10	10	7	11	8	6	5	4	4	4	6	3	1	1	3	3	2	2	2	2	1	1	0	0	ID	0	0	8	9	8	8	8	8	8	8	8	8	8	8	8	7	7	7	7	7
22684	65	66	23	21	10	10	7	11	8	6	5	4	4	4	6	3	1	1	3	3	2	2	2	2	1	1	0	0	0	ID	0	8	9	8	8	8	8	8	8	8	8	8	8	8	7	7	7	7	7
25827-3	65	66	23	21	10	10	7	11	8	6	5	4	4	4	6	3	1	1	3	3	2	2	2	2	1	1	0	0	0	0	ID	8	9	8	8	8	8	8	8	8	8	8	8	8	7	7	7	7	7
61-1	65	66	25	23	12	12	11	15	10	10	9	8	8	8	10	9	7	7	9	9	8	8	8	10	9	9	8	8	8	8	8	ID	1	8	8	8	8	8	8	8	8	8	8	8	7	7	7	7	7
61-2	66	67	26	24	13	13	12	16	11	11	10	9	9	9	11	10	8	8	10	10	9	9	9	11	10	10	9	9	9	9	9	1	ID	9	9	9	9	9	9	9	9	9	9	9	8	8	8	8	8
785	67	68	25	23	12	12	11	15	10	10	9	8	8	8	10	9	7	7	9	9	8	8	8	10	9	9	8	8	8	8	8	8	9	ID	0	0	0	6	6	6	6	6	6	6	5	5	5	5	5
913	67	68	25	23	12	12	11	15	10	10	9	8	8	8	10	9	7	7	9	9	8	8	8	10	9	9	8	8	8	8	8	8	9	0	ID	0	0	6	6	6	6	6	6	6	5	5	5	5	5
913	67	68	25	23	12	12	11	15	10	10	9	8	8	8	10	9	7	7	9	9	8	8	8	10	9	9	8	8	8	8	8	8	9	0	0	ID	0	6	6	6	6	6	6	6	5	5	5	5	5
913	67	68	25	23	12	12	11	15	10	10	9	8	8	8	10	9	7	7	9	9	8	8	8	10	9	9	8	8	8	8	8	8	9	0	0	0	ID	6	6	6	6	6	6	6	5	5	5	5	5
785	67	68	25	23	12	12	11	15	10	10	9	8	8	8	10	9	7	7	9	9	8	8	8	10	9	9	8	8	8	8	8	8	9	6	6	6	6	ID	6	6	6	6	6	6	5	5	5	5	5
25322-205	67	68	25	23	12	12	11	15	10	10	9	8	8	8	10	9	7	7	9	9	8	8	8	10	9	9	8	8	8	8	8	8	9	6	6	6	6	6	ID	0	0	2	2	2	1	1	1	1	1
25322-179	67	68	25	23	12	12	11	15	10	10	9	8	8	8	10	9	7	7	9	9	8	8	8	10	9	9	8	8	8	8	8	8	9	6	6	6	6	6	0	ID	0	2	2	2	1	1	1	1	1
25322-229	67	68	25	23	12	12	11	15	10	10	9	8	8	8	10	9	7	7	9	9	8	8	8	10	9	9	8	8	8	8	8	8	9	6	6	6	6	6	0	0	ID	2	2	2	1	1	1	1	1
22224-2T	67	68	25	23	12	12	11	15	10	10	9	8	8	8	10	9	7	7	9	9	8	8	8	10	9	9	8	8	8	8	8	8	9	6	6	6	6	6	2	2	2	ID	2	2	1	1	1	1	1
22750	67	68	25	23	12	12	11	15	10	10	9	8	8	8	10	9	7	7	9	9	8	8	8	10	9	9	8	8	8	8	8	8	9	6	6	6	6	6	2	2	2	2	ID	1	1	1	1	1	1
23458-1K	67	68	25	23	12	12	11	15	10	10	9	8	8	8	10	9	7	7	9	9	8	8	8	10	9	9	8	8	8	8	8	8	9	6	6	6	6	6	2	2	2	2	1	ID	1	1	1	1	1
22224-3T	66	67	24	22	11	11	10	14	9	9	8	7	7	7	9	8	6	6	8	8	7	7	7	9	8	8	7	7	7	7	7	7	8	5	5	5	5	5	1	1	1	1	1	1	ID	0	0	0	0
22224-4T	66	67	24	22	11	11	10	14	9	9	8	7	7	7	9	8	6	6	8	8	7	7	7	9	8	8	7	7	7	7	7	7	8	5	5	5	5	5	1	1	1	1	1	1	0	ID	0	0	0
23589-1T	66	67	24	22	11	11	10	14	9	9	8	7	7	7	9	8	6	6	8	8	7	7	7	9	8	8	7	7	7	7	7	7	8	5	5	5	5	5	1	1	1	1	1	1	0	0	ID	0	0
22608-1	66	67	24	22	11	11	10	14	9	9	8	7	7	7	9	8	6	6	8	8	7	7	7	9	8	8	7	7	7	7	7	7	8	5	5	5	5	5	1	1	1	1	1	1	0	0	0	ID	0
23589-3	66	67	24	22	11	11	10	14	9	9	8	7	7	7	9	8	6	6	8	8	7	7	7	9	8	8	7	7	7	7	7	7	8	5	5	5	5	5	1	1	1	1	1	1	0	0	0	0	ID
22608-3T	66	67	24	22	11	11	10	14	9	9	8	7	7	7	9	8	6	6	8	8	7	7	7	9	8	8	7	7	7	7	7	7	8	5	5	5	5	5	1	1	1	1	1	1	0	0	0	0	0
23458-4T	66	67	24	22	11	11	10	14	9	9	8	7	7	7	9	8	6	6	8	8	7	7	7	9	8	8	7	7	7	7	7	7	8	5	5	5	5	5	1	1	1	1	1	1	0	0	0	0	0
22608-1T	66	67	24	22	11	11	10	14	9	9	8	7	7	7	9	8	6	6	8	8	7	7	7	9	8	8	7	7	7	7	7	7	8	5	5	5	5	5	1	1	1	1	1	1	0	0	0	0	0
23589-1T	66	67	24	22	11	11	10	14	9	9	8	7	7	7	9	8	6	6	8	8	7	7	7	9	8	8	7	7	7	7	7	7	8	5	5	5	5	5	1	1	1	1	1	1	0	0	0	0	0
23458-5T	66	67	24	22	11	11	10	14	9	9	8	7	7	7	9	8	6	6	8	8	7	7	7	9	8	8	7	7	7	7	7	7	8	5	5	5	5	5	1	1	1	1	1	1	0	0	0	0	0
23589-4	66	67	24	22	11	11	10	14	9	9	8	7	7	7	9	8	6	6	8	8	7	7	7	9	8	8	7	7	7	7	7	7	8	5	5	5	5	5	1	1	1	1	1	1	0	0	0	0	0
23458-2T	66	67	24	22	11	11	10	14	9	9	8	7	7	7	9	8	6	6	8	8	7	7	7	9	8	8	7	7	7	7	7	7	8	5	5	5	5	5	1	1	1	1	1	1	0	0	0	0	0
22608-2	66	67	24	22	11	11	10	14	9	9	8	7	7	7	9	8	6	6	8	8	7	7	7	9	8	8	7	7	7	7	7	7	8	5	5	5	5	5	1	1	1	1	1	1	0	0	0	0	0
22224-3K	66	67	24	22	11	11	10	14	9	9	8	7	7	7	9	8	6	6	8	8	7	7	7	9	8	8	7	7	7	7	7	7	8	5	5	5	5	5	1	1	1	1	1	1	0	0	0	0	0
22608-2T	66	67	24	22	11	11	10	14	9	9	8	7	7	7	9	8	6	6	8	8	7	7	7	9	8	8	7	7	7	7	7	7	8	5	5	5	5	5	1	1	1	1	1	1	0	0	0	0	0
[truncated: 70 more columns]

## Sheet: MP
Sequence Identity Matrix
MP-nt	20689-27T	20689-28T	18520-2	18520-1	22380	25690	23608	23608-1K	23609	25338-1	25338-2	23458-1K	2968	8028-1	8028-2	3306-1	3306-2	63	21312	25702-2	25827-2	25827-1	25827-3	2755	22684	22477-1	22477-2	23404-2T	23404	23404-4K	23404-4T	23404-2K	61-1	61-2	785	785	913	913	913	25322-205	25322-229	25322-179	23458-5T	23458-4T	23458-2T	22750	22608-1	22608-2T	22608-3T
20689-27T	ID	1	0.959	0.959	0.956	0.958	0.955	0.955	0.955	0.955	0.954	0.957	0.956	0.955	0.955	0.956	0.955	0.958	0.957	0.958	0.957	0.957	0.957	0.958	0.958	0.958	0.958	0.958	0.958	0.958	0.958	0.958	0.96	0.96	0.959	0.959	0.959	0.959	0.959	0.957	0.957	0.959	0.959	0.959	0.959	0.957	0.959	0.959	0.959
20689-28T	1	ID	0.959	0.959	0.956	0.958	0.955	0.955	0.955	0.955	0.954	0.957	0.956	0.955	0.955	0.956	0.955	0.958	0.957	0.958	0.957	0.957	0.957	0.958	0.958	0.958	0.958	0.958	0.958	0.958	0.958	0.958	0.96	0.96	0.959	0.959	0.959	0.959	0.959	0.957	0.957	0.959	0.959	0.959	0.959	0.957	0.959	0.959	0.959
18520-2	0.959	0.959	ID	1	0.987	0.989	0.986	0.986	0.986	0.986	0.985	0.988	0.987	0.986	0.986	0.987	0.986	0.989	0.988	0.989	0.988	0.988	0.988	0.989	0.989	0.989	0.989	0.989	0.989	0.989	0.989	0.989	0.989	0.989	0.99	0.99	0.99	0.99	0.99	0.988	0.988	0.99	0.99	0.99	0.99	0.988	0.99	0.99	0.99
18520-1	0.959	0.959	1	ID	0.987	0.989	0.986	0.986	0.986	0.986	0.985	0.988	0.987	0.986	0.986	0.987	0.986	0.989	0.988	0.989	0.988	0.988	0.988	0.989	0.989	0.989	0.989	0.989	0.989	0.989	0.989	0.989	0.989	0.989	0.99	0.99	0.99	0.99	0.99	0.988	0.988	0.99	0.99	0.99	0.99	0.988	0.99	0.99	0.99
22380	0.956	0.956	0.987	0.987	ID	0.997	0.992	0.992	0.992	0.992	0.991	0.994	0.993	0.992	0.992	0.993	0.992	0.995	0.994	0.995	0.994	0.994	0.994	0.995	0.995	0.995	0.995	0.995	0.995	0.995	0.995	0.995	0.995	0.995	0.996	0.996	0.996	0.996	0.996	0.994	0.994	0.996	0.996	0.996	0.996	0.994	0.996	0.996	0.996
25690	0.958	0.958	0.989	0.989	0.997	ID	0.994	0.994	0.994	0.994	0.993	0.996	0.995	0.994	0.994	0.995	0.994	0.997	0.996	0.997	0.996	0.996	0.996	0.997	0.997	0.997	0.997	0.997	0.997	0.997	0.997	0.997	0.997	0.997	0.998	0.998	0.998	0.998	0.998	0.996	0.996	0.998	0.998	0.998	0.998	0.996	0.998	0.998	0.998
23608	0.955	0.955	0.986	0.986	0.992	0.994	ID	1	1	1	0.998	0.993	0.994	0.993	0.993	0.994	0.993	0.996	0.995	0.996	0.995	0.995	0.995	0.996	0.996	0.996	0.996	0.996	0.996	0.996	0.996	0.996	0.994	0.994	0.995	0.995	0.995	0.995	0.995	0.993	0.993	0.995	0.995	0.995	0.995	0.993	0.995	0.995	0.995
23608-1K	0.955	0.955	0.986	0.986	0.992	0.994	1	ID	1	1	0.998	0.993	0.994	0.993	0.993	0.994	0.993	0.996	0.995	0.996	0.995	0.995	0.995	0.996	0.996	0.996	0.996	0.996	0.996	0.996	0.996	0.996	0.994	0.994	0.995	0.995	0.995	0.995	0.995	0.993	0.993	0.995	0.995	0.995	0.995	0.993	0.995	0.995	0.995
23609	0.955	0.955	0.986	0.986	0.992	0.994	1	1	ID	1	0.998	0.993	0.994	0.993	0.993	0.994	0.993	0.996	0.995	0.996	0.995	0.995	0.995	0.996	0.996	0.996	0.996	0.996	0.996	0.996	0.996	0.996	0.994	0.994	0.995	0.995	0.995	0.995	0.995	0.993	0.993	0.995	0.995	0.995	0.995	0.993	0.995	0.995	0.995
25338-1	0.955	0.955	0.986	0.986	0.992	0.994	1	1	1	ID	0.998	0.993	0.994	0.993	0.993	0.994	0.993	0.996	0.995	0.996	0.995	0.995	0.995	0.996	0.996	0.996	0.996	0.996	0.996	0.996	0.996	0.996	0.994	0.994	0.995	0.995	0.995	0.995	0.995	0.993	0.993	0.995	0.995	0.995	0.995	0.993	0.995	0.995	0.995
25338-2	0.954	0.954	0.985	0.985	0.991	0.993	0.998	0.998	0.998	0.998	ID	0.992	0.993	0.992	0.992	0.993	0.992	0.995	0.994	0.995	0.994	0.994	0.994	0.995	0.995	0.995	0.995	0.995	0.995	0.995	0.995	0.995	0.993	0.993	0.994	0.994	0.994	0.994	0.994	0.992	0.992	0.994	0.994	0.994	0.994	0.992	0.994	0.994	0.994
23458-1K	0.957	0.957	0.988	0.988	0.994	0.996	0.993	0.993	0.993	0.993	0.992	ID	0.994	0.993	0.993	0.994	0.993	0.996	0.995	0.996	0.995	0.995	0.995	0.996	0.996	0.996	0.996	0.996	0.996	0.996	0.996	0.996	0.996	0.996	0.997	0.997	0.997	0.997	0.997	0.995	0.995	0.997	0.997	0.997	0.997	0.997	0.997	0.997	0.997
2968	0.956	0.956	0.987	0.987	0.993	0.995	0.994	0.994	0.994	0.994	0.993	0.994	ID	0.998	0.998	0.995	0.994	0.997	0.996	0.997	0.996	0.996	0.996	0.997	0.997	0.997	0.997	0.997	0.997	0.997	0.997	0.997	0.995	0.995	0.996	0.996	0.996	0.996	0.996	0.994	0.994	0.996	0.996	0.996	0.996	0.994	0.996	0.996	0.996
8028-1	0.955	0.955	0.986	0.986	0.992	0.994	0.993	0.993	0.993	0.993	0.992	0.993	0.998	ID	1	0.994	0.993	0.996	0.995	0.996	0.995	0.995	0.995	0.996	0.996	0.996	0.996	0.996	0.996	0.996	0.996	0.996	0.994	0.994	0.995	0.995	0.995	0.995	0.995	0.993	0.993	0.995	0.995	0.995	0.995	0.993	0.995	0.995	0.995
8028-2	0.955	0.955	0.986	0.986	0.992	0.994	0.993	0.993	0.993	0.993	0.992	0.993	0.998	1	ID	0.994	0.993	0.996	0.995	0.996	0.995	0.995	0.995	0.996	0.996	0.996	0.996	0.996	0.996	0.996	0.996	0.996	0.994	0.994	0.995	0.995	0.995	0.995	0.995	0.993	0.993	0.995	0.995	0.995	0.995	0.993	0.995	0.995	0.995
3306-1	0.956	0.956	0.987	0.987	0.993	0.995	0.994	0.994	0.994	0.994	0.993	0.994	0.995	0.994	0.994	ID	0.998	0.997	0.996	0.997	0.996	0.996	0.996	0.997	0.997	0.997	0.997	0.997	0.997	0.997	0.997	0.997	0.995	0.995	0.996	0.996	0.996	0.996	0.996	0.994	0.994	0.996	0.996	0.996	0.996	0.994	0.996	0.996	0.996
3306-2	0.955	0.955	0.986	0.986	0.992	0.994	0.993	0.993	0.993	0.993	0.992	0.993	0.994	0.993	0.993	0.998	ID	0.996	0.995	0.996	0.995	0.995	0.995	0.996	0.996	0.996	0.996	0.996	0.996	0.996	0.996	0.996	0.994	0.994	0.995	0.995	0.995	0.995	0.995	0.993	0.993	0.995	0.995	0.995	0.995	0.993	0.995	0.995	0.995
63	0.958	0.958	0.989	0.989	0.995	0.997	0.996	0.996	0.996	0.996	0.995	0.996	0.997	0.996	0.996	0.997	0.996	ID	0.998	1	0.998	0.998	0.998	1	1	1	1	1	1	1	1	1	0.997	0.997	0.998	0.998	0.998	0.998	0.998	0.996	0.996	0.998	0.998	0.998	0.998	0.996	0.998	0.998	0.998
21312	0.957	0.957	0.988	0.988	0.994	0.996	0.995	0.995	0.995	0.995	0.994	0.995	0.996	0.995	0.995	0.996	0.995	0.998	ID	0.998	0.997	0.997	0.997	0.998	0.998	0.998	0.998	0.998	0.998	0.998	0.998	0.998	0.996	0.996	0.997	0.997	0.997	0.997	0.997	0.995	0.995	0.997	0.997	0.997	0.997	0.995	0.997	0.997	0.997
25702-2	0.958	0.958	0.989	0.989	0.995	0.997	0.996	0.996	0.996	0.996	0.995	0.996	0.997	0.996	0.996	0.997	0.996	1	0.998	ID	0.998	0.998	0.998	1	1	1	1	1	1	1	1	1	0.997	0.997	0.998	0.998	0.998	0.998	0.998	0.996	0.996	0.998	0.998	0.998	0.998	0.996	0.998	0.998	0.998
25827-2	0.957	0.957	0.988	0.988	0.994	0.996	0.995	0.995	0.995	0.995	0.994	0.995	0.996	0.995	0.995	0.996	0.995	0.998	0.997	0.998	ID	1	1	0.998	0.998	0.998	0.998	0.998	0.998	0.998	0.998	0.998	0.996	0.996	0.997	0.997	0.997	0.997	0.997	0.995	0.995	0.997	0.997	0.997	0.997	0.995	0.997	0.997	0.997
25827-1	0.957	0.957	0.988	0.988	0.994	0.996	0.995	0.995	0.995	0.995	0.994	0.995	0.996	0.995	0.995	0.996	0.995	0.998	0.997	0.998	1	ID	1	0.998	0.998	0.998	0.998	0.998	0.998	0.998	0.998	0.998	0.996	0.996	0.997	0.997	0.997	0.997	0.997	0.995	0.995	0.997	0.997	0.997	0.997	0.995	0.997	0.997	0.997
25827-3	0.957	0.957	0.988	0.988	0.994	0.996	0.995	0.995	0.995	0.995	0.994	0.995	0.996	0.995	0.995	0.996	0.995	0.998	0.997	0.998	1	1	ID	0.998	0.998	0.998	0.998	0.998	0.998	0.998	0.998	0.998	0.996	0.996	0.997	0.997	0.997	0.997	0.997	0.995	0.995	0.997	0.997	0.997	0.997	0.995	0.997	0.997	0.997
2755	0.958	0.958	0.989	0.989	0.995	0.997	0.996	0.996	0.996	0.996	0.995	0.996	0.997	0.996	0.996	0.997	0.996	1	0.998	1	0.998	0.998	0.998	ID	1	1	1	1	1	1	1	1	0.997	0.997	0.998	0.998	0.998	0.998	0.998	0.996	0.996	0.998	0.998	0.998	0.998	0.996	0.998	0.998	0.998
22684	0.958	0.958	0.989	0.989	0.995	0.997	0.996	0.996	0.996	0.996	0.995	0.996	0.997	0.996	0.996	0.997	0.996	1	0.998	1	0.998	0.998	0.998	1	ID	1	1	1	1	1	1	1	0.997	0.997	0.998	0.998	0.998	0.998	0.998	0.996	0.996	0.998	0.998	0.998	0.998	0.996	0.998	0.998	0.998
22477-1	0.958	0.958	0.989	0.989	0.995	0.997	0.996	0.996	0.996	0.996	0.995	0.996	0.997	0.996	0.996	0.997	0.996	1	0.998	1	0.998	0.998	0.998	1	1	ID	1	1	1	1	1	1	0.997	0.997	0.998	0.998	0.998	0.998	0.998	0.996	0.996	0.998	0.998	0.998	0.998	0.996	0.998	0.998	0.998
22477-2	0.958	0.958	0.989	0.989	0.995	0.997	0.996	0.996	0.996	0.996	0.995	0.996	0.997	0.996	0.996	0.997	0.996	1	0.998	1	0.998	0.998	0.998	1	1	1	ID	1	1	1	1	1	0.997	0.997	0.998	0.998	0.998	0.998	0.998	0.996	0.996	0.998	0.998	0.998	0.998	0.996	0.998	0.998	0.998
23404-2T	0.958	0.958	0.989	0.989	0.995	0.997	0.996	0.996	0.996	0.996	0.995	0.996	0.997	0.996	0.996	0.997	0.996	1	0.998	1	0.998	0.998	0.998	1	1	1	1	ID	1	1	1	1	0.997	0.997	0.998	0.998	0.998	0.998	0.998	0.996	0.996	0.998	0.998	0.998	0.998	0.996	0.998	0.998	0.998
23404	0.958	0.958	0.989	0.989	0.995	0.997	0.996	0.996	0.996	0.996	0.995	0.996	0.997	0.996	0.996	0.997	0.996	1	0.998	1	0.998	0.998	0.998	1	1	1	1	1	ID	1	1	1	0.997	0.997	0.998	0.998	0.998	0.998	0.998	0.996	0.996	0.998	0.998	0.998	0.998	0.996	0.998	0.998	0.998
23404-4K	0.958	0.958	0.989	0.989	0.995	0.997	0.996	0.996	0.996	0.996	0.995	0.996	0.997	0.996	0.996	0.997	0.996	1	0.998	1	0.998	0.998	0.998	1	1	1	1	1	1	ID	1	1	0.997	0.997	0.998	0.998	0.998	0.998	0.998	0.996	0.996	0.998	0.998	0.998	0.998	0.996	0.998	0.998	0.998
23404-4T	0.958	0.958	0.989	0.989	0.995	0.997	0.996	0.996	0.996	0.996	0.995	0.996	0.997	0.996	0.996	0.997	0.996	1	0.998	1	0.998	0.998	0.998	1	1	1	1	1	1	1	ID	1	0.997	0.997	0.998	0.998	0.998	0.998	0.998	0.996	0.996	0.998	0.998	0.998	0.998	0.996	0.998	0.998	0.998
23404-2K	0.958	0.958	0.989	0.989	0.995	0.997	0.996	0.996	0.996	0.996	0.995	0.996	0.997	0.996	0.996	0.997	0.996	1	0.998	1	0.998	0.998	0.998	1	1	1	1	1	1	1	1	ID	0.997	0.997	0.998	0.998	0.998	0.998	0.998	0.996	0.996	0.998	0.998	0.998	0.998	0.996	0.998	0.998	0.998
61-1	0.96	0.96	0.989	0.989	0.995	0.997	0.994	0.994	0.994	0.994	0.993	0.996	0.995	0.994	0.994	0.995	0.994	0.997	0.996	0.997	0.996	0.996	0.996	0.997	0.997	0.997	0.997	0.997	0.997	0.997	0.997	0.997	ID	1	0.998	0.998	0.998	0.998	0.998	0.996	0.996	0.998	0.998	0.998	0.998	0.996	0.998	0.998	0.998
61-2	0.96	0.96	0.989	0.989	0.995	0.997	0.994	0.994	0.994	0.994	0.993	0.996	0.995	0.994	0.994	0.995	0.994	0.997	0.996	0.997	0.996	0.996	0.996	0.997	0.997	0.997	0.997	0.997	0.997	0.997	0.997	0.997	1	ID	0.998	0.998	0.998	0.998	0.998	0.996	0.996	0.998	0.998	0.998	0.998	0.996	0.998	0.998	0.998
785	0.959	0.959	0.99	0.99	0.996	0.998	0.995	0.995	0.995	0.995	0.994	0.997	0.996	0.995	0.995	0.996	0.995	0.998	0.997	0.998	0.997	0.997	0.997	0.998	0.998	0.998	0.998	0.998	0.998	0.998	0.998	0.998	0.998	0.998	ID	1	1	1	1	0.997	0.997	1	1	1	1	0.997	1	1	1
785	0.959	0.959	0.99	0.99	0.996	0.998	0.995	0.995	0.995	0.995	0.994	0.997	0.996	0.995	0.995	0.996	0.995	0.998	0.997	0.998	0.997	0.997	0.997	0.998	0.998	0.998	0.998	0.998	0.998	0.998	0.998	0.998	0.998	0.998	1	ID	1	1	1	0.997	0.997	1	1	1	1	0.997	1	1	1
913	0.959	0.959	0.99	0.99	0.996	0.998	0.995	0.995	0.995	0.995	0.994	0.997	0.996	0.995	0.995	0.996	0.995	0.998	0.997	0.998	0.997	0.997	0.997	0.998	0.998	0.998	0.998	0.998	0.998	0.998	0.998	0.998	0.998	0.998	1	1	ID	1	1	0.997	0.997	1	1	1	1	0.997	1	1	1
913	0.959	0.959	0.99	0.99	0.996	0.998	0.995	0.995	0.995	0.995	0.994	0.997	0.996	0.995	0.995	0.996	0.995	0.998	0.997	0.998	0.997	0.997	0.997	0.998	0.998	0.998	0.998	0.998	0.998	0.998	0.998	0.998	0.998	0.998	1	1	1	ID	1	0.997	0.997	1	1	1	1	0.997	1	1	1
913	0.959	0.959	0.99	0.99	0.996	0.998	0.995	0.995	0.995	0.995	0.994	0.997	0.996	0.995	0.995	0.996	0.995	0.998	0.997	0.998	0.997	0.997	0.997	0.998	0.998	0.998	0.998	0.998	0.998	0.998	0.998	0.998	0.998	0.998	1	1	1	1	ID	0.997	0.997	1	1	1	1	0.997	1	1	1
25322-205	0.957	0.957	0.988	0.988	0.994	0.996	0.993	0.993	0.993	0.993	0.992	0.995	0.994	0.993	0.993	0.994	0.993	0.996	0.995	0.996	0.995	0.995	0.995	0.996	0.996	0.996	0.996	0.996	0.996	0.996	0.996	0.996	0.996	0.996	0.997	0.997	0.997	0.997	0.997	ID	1	0.997	0.997	0.997	0.997	0.995	0.997	0.997	0.997
25322-229	0.957	0.957	0.988	0.988	0.994	0.996	0.993	0.993	0.993	0.993	0.992	0.995	0.994	0.993	0.993	0.994	0.993	0.996	0.995	0.996	0.995	0.995	0.995	0.996	0.996	0.996	0.996	0.996	0.996	0.996	0.996	0.996	0.996	0.996	0.997	0.997	0.997	0.997	0.997	1	ID	0.997	0.997	0.997	0.997	0.995	0.997	0.997	0.997
25322-179	0.959	0.959	0.99	0.99	0.996	0.998	0.995	0.995	0.995	0.995	0.994	0.997	0.996	0.995	0.995	0.996	0.995	0.998	0.997	0.998	0.997	0.997	0.997	0.998	0.998	0.998	0.998	0.998	0.998	0.998	0.998	0.998	0.998	0.998	1	1	1	1	1	0.997	0.997	ID	1	1	1	0.997	1	1	1
23458-5T	0.959	0.959	0.99	0.99	0.996	0.998	0.995	0.995	0.995	0.995	0.994	0.997	0.996	0.995	0.995	0.996	0.995	0.998	0.997	0.998	0.997	0.997	0.997	0.998	0.998	0.998	0.998	0.998	0.998	0.998	0.998	0.998	0.998	0.998	1	1	1	1	1	0.997	0.997	1	ID	1	1	0.997	1	1	1
23458-4T	0.959	0.959	0.99	0.99	0.996	0.998	0.995	0.995	0.995	0.995	0.994	0.997	0.996	0.995	0.995	0.996	0.995	0.998	0.997	0.998	0.997	0.997	0.997	0.998	0.998	0.998	0.998	0.998	0.998	0.998	0.998	0.998	0.998	0.998	1	1	1	1	1	0.997	0.997	1	1	ID	1	0.997	1	1	1
23458-2T	0.959	0.959	0.99	0.99	0.996	0.998	0.995	0.995	0.995	0.995	0.994	0.997	0.996	0.995	0.995	0.996	0.995	0.998	0.997	0.998	0.997	0.997	0.997	0.998	0.998	0.998	0.998	0.998	0.998	0.998	0.998	0.998	0.998	0.998	1	1	1	1	1	0.997	0.997	1	1	1	ID	0.997	1	1	1
22750	0.957	0.957	0.988	0.988	0.994	0.996	0.993	0.993	0.993	0.993	0.992	0.997	0.994	0.993	0.993	0.994	0.993	0.996	0.995	0.996	0.995	0.995	0.995	0.996	0.996	0.996	0.996	0.996	0.996	0.996	0.996	0.996	0.996	0.996	0.997	0.997	0.997	0.997	0.997	0.995	0.995	0.997	0.997	0.997	0.997	ID	0.997	0.997	0.997
22608-1	0.959	0.959	0.99	0.99	0.996	0.998	0.995	0.995	0.995	0.995	0.994	0.997	0.996	0.995	0.995	0.996	0.995	0.998	0.997	0.998	0.997	0.997	0.997	0.998	0.998	0.998	0.998	0.998	0.998	0.998	0.998	0.998	0.998	0.998	1	1	1	1	1	0.997	0.997	1	1	1	1	0.997	ID	1	1
22608-2T	0.959	0.959	0.99	0.99	0.996	0.998	0.995	0.995	0.995	0.995	0.994	0.997	0.996	0.995	0.995	0.996	0.995	0.998	0.997	0.998	0.997	0.997	0.997	0.998	0.998	0.998	0.998	0.998	0.998	0.998	0.998	0.998	0.998	0.998	1	1	1	1	1	0.997	0.997	1	1	1	1	0.997	1	ID	1
22608-3T	0.959	0.959	0.99	0.99	0.996	0.998	0.995	0.995	0.995	0.995	0.994	0.997	0.996	0.995	0.995	0.996	0.995	0.998	0.997	0.998	0.997	0.997	0.997	0.998	0.998	0.998	0.998	0.998	0.998	0.998	0.998	0.998	0.998	0.998	1	1	1	1	1	0.997	0.997	1	1	1	1	0.997	1	1	ID
22608-2	0.959	0.959	0.99	0.99	0.996	0.998	0.995	0.995	0.995	0.995	0.994	0.997	0.996	0.995	0.995	0.996	0.995	0.998	0.997	0.998	0.997	0.997	0.997	0.998	0.998	0.998	0.998	0.998	0.998	0.998	0.998	0.998	0.998	0.998	1	1	1	1	1	0.997	0.997	1	1	1	1	0.997	1	1	1
22608-1T	0.959	0.959	0.99	0.99	0.996	0.998	0.995	0.995	0.995	0.995	0.994	0.997	0.996	0.995	0.995	0.996	0.995	0.998	0.997	0.998	0.997	0.997	0.997	0.998	0.998	0.998	0.998	0.998	0.998	0.998	0.998	0.998	0.998	0.998	1	1	1	1	1	0.997	0.997	1	1	1	1	0.997	1	1	1
23589-3	0.958	0.958	0.989	0.989	0.995	0.997	0.994	0.994	0.994	0.994	0.993	0.996	0.995	0.994	0.994	0.995	0.994	0.997	0.996	0.997	0.996	0.996	0.996	0.997	0.997	0.997	0.997	0.997	0.997	0.997	0.997	0.997	0.997	0.997	0.998	0.998	0.998	0.998	0.998	0.996	0.996	0.998	0.998	0.998	0.998	0.996	0.998	0.998	0.998
23589-4	0.959	0.959	0.99	0.99	0.996	0.998	0.995	0.995	0.995	0.995	0.994	0.997	0.996	0.995	0.995	0.996	0.995	0.998	0.997	0.998	0.997	0.997	0.997	0.998	0.998	0.998	0.998	0.998	0.998	0.998	0.998	0.998	0.998	0.998	1	1	1	1	1	0.997	0.997	1	1	1	1	0.997	1	1	1
23589-1T	0.959	0.959	0.99	0.99	0.996	0.998	0.995	0.995	0.995	0.995	0.994	0.997	0.996	0.995	0.995	0.996	0.995	0.998	0.997	0.998	0.997	0.997	0.997	0.998	0.998	0.998	0.998	0.998	0.998	0.998	0.998	0.998	0.998	0.998	1	1	1	1	1	0.997	0.997	1	1	1	1	0.997	1	1	1
23589-1T	0.959	0.959	0.99	0.99	0.996	0.998	0.995	0.995	0.995	0.995	0.994	0.997	0.996	0.995	0.995	0.996	0.995	0.998	0.997	0.998	0.997	0.997	0.997	0.998	0.998	0.998	0.998	0.998	0.998	0.998	0.998	0.998	0.998	0.998	1	1	1	1	1	0.997	0.997	1	1	1	1	0.997	1	1	1
22224-3K	0.96	0.96	0.989	0.989	0.995	0.997	0.994	0.994	0.994	0.994	0.993	0.996	0.995	0.994	0.994	0.995	0.994	0.997	0.996	0.997	0.996	0.996	0.996	0.997	0.997	0.997	0.997	0.997	0.997	0.997	0.997	0.997	0.997	0.997	0.998	0.998	0.998	0.998	0.998	0.996	0.996	0.998	0.998	0.998	0.998	0.996	0.998	0.998	0.998
22224-3T	0.96	0.96	0.989	0.989	0.995	0.997	0.994	0.994	0.994	0.994	0.993	0.996	0.995	0.994	0.994	0.995	0.994	0.997	0.996	0.997	0.996	0.996	0.996	0.997	0.997	0.997	0.997	0.997	0.997	0.997	0.997	0.997	0.997	0.997	0.998	0.998	0.998	0.998	0.998	0.996	0.996	0.998	0.998	0.998	0.998	0.996	0.998	0.998	0.998
22224-2T	0.96	0.96	0.989	0.989	0.995	0.997	0.994	0.994	0.994	0.994	0.993	0.996	0.995	0.994	0.994	0.995	0.994	0.997	0.996	0.997	0.996	0.996	0.996	0.997	0.997	0.997	0.997	0.997	0.997	0.997	0.997	0.997	0.997	0.997	0.998	0.998	0.998	0.998	0.998	0.996	0.996	0.998	0.998	0.998	0.998	0.996	0.998	0.998	0.998
22224-4T	0.96	0.96	0.989	0.989	0.995	0.997	0.994	0.994	0.994	0.994	0.993	0.996	0.995	0.994	0.994	0.995	0.994	0.997	0.996	0.997	0.996	0.996	0.996	0.997	0.997	0.997	0.997	0.997	0.997	0.997	0.997	0.997	0.997	0.997	0.998	0.998	0.998	0.998	0.998	0.996	0.996	0.998	0.998	0.998	0.998	0.996	0.998	0.998	0.998
Sequence Difference Count Matrix
MP-nt	20689-27T	20689-28T	18520-2	18520-1	22380	25690	23608	23608-1K	23609	25338-1	25338-2	23458-1K	2968	8028-1	8028-2	3306-1	3306-2	63	21312	25702-2	25827-2	25827-1	25827-3	2755	22684	22477-1	22477-2	23404-2T	23404	23404-4K	23404-4T	23404-2K	61-1	61-2	785	785	913	913	913	25322-205	25322-229	25322-179	23458-5T	23458-4T	23458-2T	22750	22608-1	22608-2T	22608-3T
20689-27T	ID	0	40	40	43	41	44	44	44	44	45	42	43	44	44	43	44	41	42	41	42	42	42	41	41	41	41	41	41	41	41	41	39	39	40	40	40	40	40	42	42	40	40	40	40	42	40	40	40
20689-28T	0	ID	40	40	43	41	44	44	44	44	45	42	43	44	44	43	44	41	42	41	42	42	42	41	41	41	41	41	41	41	41	41	39	39	40	40	40	40	40	42	42	40	40	40	40	42	40	40	40
18520-2	40	40	ID	0	12	10	13	13	13	13	14	11	12	13	13	12	13	10	11	10	11	11	11	10	10	10	10	10	10	10	10	10	10	10	9	9	9	9	9	11	11	9	9	9	9	11	9	9	9
18520-1	40	40	0	ID	12	10	13	13	13	13	14	11	12	13	13	12	13	10	11	10	11	11	11	10	10	10	10	10	10	10	10	10	10	10	9	9	9	9	9	11	11	9	9	9	9	11	9	9	9
22380	43	43	12	12	ID	2	7	7	7	7	8	5	6	7	7	6	7	4	5	4	5	5	5	4	4	4	4	4	4	4	4	4	4	4	3	3	3	3	3	5	5	3	3	3	3	5	3	3	3
25690	41	41	10	10	2	ID	5	5	5	5	6	3	4	5	5	4	5	2	3	2	3	3	3	2	2	2	2	2	2	2	2	2	2	2	1	1	1	1	1	3	3	1	1	1	1	3	1	1	1
23608	44	44	13	13	7	5	ID	0	0	0	1	6	5	6	6	5	6	3	4	3	4	4	4	3	3	3	3	3	3	3	3	3	5	5	4	4	4	4	4	6	6	4	4	4	4	6	4	4	4
23608-1K	44	44	13	13	7	5	0	ID	0	0	1	6	5	6	6	5	6	3	4	3	4	4	4	3	3	3	3	3	3	3	3	3	5	5	4	4	4	4	4	6	6	4	4	4	4	6	4	4	4
23609	44	44	13	13	7	5	0	0	ID	0	1	6	5	6	6	5	6	3	4	3	4	4	4	3	3	3	3	3	3	3	3	3	5	5	4	4	4	4	4	6	6	4	4	4	4	6	4	4	4
25338-1	44	44	13	13	7	5	0	0	0	ID	1	6	5	6	6	5	6	3	4	3	4	4	4	3	3	3	3	3	3	3	3	3	5	5	4	4	4	4	4	6	6	4	4	4	4	6	4	4	4
25338-2	45	45	14	14	8	6	1	1	1	1	ID	7	6	7	7	6	7	4	5	4	5	5	5	4	4	4	4	4	4	4	4	4	6	6	5	5	5	5	5	7	7	5	5	5	5	7	5	5	5
23458-1K	42	42	11	11	5	3	6	6	6	6	7	ID	5	6	6	5	6	3	4	3	4	4	4	3	3	3	3	3	3	3	3	3	3	3	2	2	2	2	2	4	4	2	2	2	2	2	2	2	2
2968	43	43	12	12	6	4	5	5	5	5	6	5	ID	1	1	4	5	2	3	2	3	3	3	2	2	2	2	2	2	2	2	2	4	4	3	3	3	3	3	5	5	3	3	3	3	5	3	3	3
8028-1	44	44	13	13	7	5	6	6	6	6	7	6	1	ID	0	5	6	3	4	3	4	4	4	3	3	3	3	3	3	3	3	3	5	5	4	4	4	4	4	6	6	4	4	4	4	6	4	4	4
8028-2	44	44	13	13	7	5	6	6	6	6	7	6	1	0	ID	5	6	3	4	3	4	4	4	3	3	3	3	3	3	3	3	3	5	5	4	4	4	4	4	6	6	4	4	4	4	6	4	4	4
3306-1	43	43	12	12	6	4	5	5	5	5	6	5	4	5	5	ID	1	2	3	2	3	3	3	2	2	2	2	2	2	2	2	2	4	4	3	3	3	3	3	5	5	3	3	3	3	5	3	3	3
3306-2	44	44	13	13	7	5	6	6	6	6	7	6	5	6	6	1	ID	3	4	3	4	4	4	3	3	3	3	3	3	3	3	3	5	5	4	4	4	4	4	6	6	4	4	4	4	6	4	4	4
63	41	41	10	10	4	2	3	3	3	3	4	3	2	3	3	2	3	ID	1	0	1	1	1	0	0	0	0	0	0	0	0	0	2	2	1	1	1	1	1	3	3	1	1	1	1	3	1	1	1
21312	42	42	11	11	5	3	4	4	4	4	5	4	3	4	4	3	4	1	ID	1	2	2	2	1	1	1	1	1	1	1	1	1	3	3	2	2	2	2	2	4	4	2	2	2	2	4	2	2	2
25702-2	41	41	10	10	4	2	3	3	3	3	4	3	2	3	3	2	3	0	1	ID	1	1	1	0	0	0	0	0	0	0	0	0	2	2	1	1	1	1	1	3	3	1	1	1	1	3	1	1	1
25827-2	42	42	11	11	5	3	4	4	4	4	5	4	3	4	4	3	4	1	2	1	ID	0	0	1	1	1	1	1	1	1	1	1	3	3	2	2	2	2	2	4	4	2	2	2	2	4	2	2	2
25827-1	42	42	11	11	5	3	4	4	4	4	5	4	3	4	4	3	4	1	2	1	0	ID	0	1	1	1	1	1	1	1	1	1	3	3	2	2	2	2	2	4	4	2	2	2	2	4	2	2	2
25827-3	42	42	11	11	5	3	4	4	4	4	5	4	3	4	4	3	4	1	2	1	0	0	ID	1	1	1	1	1	1	1	1	1	3	3	2	2	2	2	2	4	4	2	2	2	2	4	2	2	2
2755	41	41	10	10	4	2	3	3	3	3	4	3	2	3	3	2	3	0	1	0	1	1	1	ID	0	0	0	0	0	0	0	0	2	2	1	1	1	1	1	3	3	1	1	1	1	3	1	1	1
22684	41	41	10	10	4	2	3	3	3	3	4	3	2	3	3	2	3	0	1	0	1	1	1	0	ID	0	0	0	0	0	0	0	2	2	1	1	1	1	1	3	3	1	1	1	1	3	1	1	1
22477-1	41	41	10	10	4	2	3	3	3	3	4	3	2	3	3	2	3	0	1	0	1	1	1	0	0	ID	0	0	0	0	0	0	2	2	1	1	1	1	1	3	3	1	1	1	1	3	1	1	1
22477-2	41	41	10	10	4	2	3	3	3	3	4	3	2	3	3	2	3	0	1	0	1	1	1	0	0	0	ID	0	0	0	0	0	2	2	1	1	1	1	1	3	3	1	1	1	1	3	1	1	1
23404-2T	41	41	10	10	4	2	3	3	3	3	4	3	2	3	3	2	3	0	1	0	1	1	1	0	0	0	0	ID	0	0	0	0	2	2	1	1	1	1	1	3	3	1	1	1	1	3	1	1	1
23404	41	41	10	10	4	2	3	3	3	3	4	3	2	3	3	2	3	0	1	0	1	1	1	0	0	0	0	0	ID	0	0	0	2	2	1	1	1	1	1	3	3	1	1	1	1	3	1	1	1
23404-4K	41	41	10	10	4	2	3	3	3	3	4	3	2	3	3	2	3	0	1	0	1	1	1	0	0	0	0	0	0	ID	0	0	2	2	1	1	1	1	1	3	3	1	1	1	1	3	1	1	1
23404-4T	41	41	10	10	4	2	3	3	3	3	4	3	2	3	3	2	3	0	1	0	1	1	1	0	0	0	0	0	0	0	ID	0	2	2	1	1	1	1	1	3	3	1	1	1	1	3	1	1	1
23404-2K	41	41	10	10	4	2	3	3	3	3	4	3	2	3	3	2	3	0	1	0	1	1	1	0	0	0	0	0	0	0	0	ID	2	2	1	1	1	1	1	3	3	1	1	1	1	3	1	1	1
61-1	39	39	10	10	4	2	5	5	5	5	6	3	4	5	5	4	5	2	3	2	3	3	3	2	2	2	2	2	2	2	2	2	ID	0	1	1	1	1	1	3	3	1	1	1	1	3	1	1	1
61-2	39	39	10	10	4	2	5	5	5	5	6	3	4	5	5	4	5	2	3	2	3	3	3	2	2	2	2	2	2	2	2	2	0	ID	1	1	1	1	1	3	3	1	1	1	1	3	1	1	1
785	40	40	9	9	3	1	4	4	4	4	5	2	3	4	4	3	4	1	2	1	2	2	2	1	1	1	1	1	1	1	1	1	1	1	ID	0	0	0	0	2	2	0	0	0	0	2	0	0	0
785	40	40	9	9	3	1	4	4	4	4	5	2	3	4	4	3	4	1	2	1	2	2	2	1	1	1	1	1	1	1	1	1	1	1	0	ID	0	0	0	2	2	0	0	0	0	2	0	0	0
913	40	40	9	9	3	1	4	4	4	4	5	2	3	4	4	3	4	1	2	1	2	2	2	1	1	1	1	1	1	1	1	1	1	1	0	0	ID	0	0	2	2	0	0	0	0	2	0	0	0
913	40	40	9	9	3	1	4	4	4	4	5	2	3	4	4	3	4	1	2	1	2	2	2	1	1	1	1	1	1	1	1	1	1	1	0	0	0	ID	0	2	2	0	0	0	0	2	0	0	0
913	40	40	9	9	3	1	4	4	4	4	5	2	3	4	4	3	4	1	2	1	2	2	2	1	1	1	1	1	1	1	1	1	1	1	0	0	0	0	ID	2	2	0	0	0	0	2	0	0	0
25322-205	42	42	11	11	5	3	6	6	6	6	7	4	5	6	6	5	6	3	4	3	4	4	4	3	3	3	3	3	3	3	3	3	3	3	2	2	2	2	2	ID	0	2	2	2	2	4	2	2	2
25322-229	42	42	11	11	5	3	6	6	6	6	7	4	5	6	6	5	6	3	4	3	4	4	4	3	3	3	3	3	3	3	3	3	3	3	2	2	2	2	2	0	ID	2	2	2	2	4	2	2	2
25322-179	40	40	9	9	3	1	4	4	4	4	5	2	3	4	4	3	4	1	2	1	2	2	2	1	1	1	1	1	1	1	1	1	1	1	0	0	0	0	0	2	2	ID	0	0	0	2	0	0	0
23458-5T	40	40	9	9	3	1	4	4	4	4	5	2	3	4	4	3	4	1	2	1	2	2	2	1	1	1	1	1	1	1	1	1	1	1	0	0	0	0	0	2	2	0	ID	0	0	2	0	0	0
23458-4T	40	40	9	9	3	1	4	4	4	4	5	2	3	4	4	3	4	1	2	1	2	2	2	1	1	1	1	1	1	1	1	1	1	1	0	0	0	0	0	2	2	0	0	ID	0	2	0	0	0
23458-2T	40	40	9	9	3	1	4	4	4	4	5	2	3	4	4	3	4	1	2	1	2	2	2	1	1	1	1	1	1	1	1	1	1	1	0	0	0	0	0	2	2	0	0	0	ID	2	0	0	0
22750	42	42	11	11	5	3	6	6	6	6	7	2	5	6	6	5	6	3	4	3	4	4	4	3	3	3	3	3	3	3	3	3	3	3	2	2	2	2	2	4	4	2	2	2	2	ID	2	2	2
22608-1	40	40	9	9	3	1	4	4	4	4	5	2	3	4	4	3	4	1	2	1	2	2	2	1	1	1	1	1	1	1	1	1	1	1	0	0	0	0	0	2	2	0	0	0	0	2	ID	0	0
22608-2T	40	40	9	9	3	1	4	4	4	4	5	2	3	4	4	3	4	1	2	1	2	2	2	1	1	1	1	1	1	1	1	1	1	1	0	0	0	0	0	2	2	0	0	0	0	2	0	ID	0
22608-3T	40	40	9	9	3	1	4	4	4	4	5	2	3	4	4	3	4	1	2	1	2	2	2	1	1	1	1	1	1	1	1	1	1	1	0	0	0	0	0	2	2	0	0	0	0	2	0	0	ID
22608-2	40	40	9	9	3	1	4	4	4	4	5	2	3	4	4	3	4	1	2	1	2	2	2	1	1	1	1	1	1	1	1	1	1	1	0	0	0	0	0	2	2	0	0	0	0	2	0	0	0
22608-1T	40	40	9	9	3	1	4	4	4	4	5	2	3	4	4	3	4	1	2	1	2	2	2	1	1	1	1	1	1	1	1	1	1	1	0	0	0	0	0	2	2	0	0	0	0	2	0	0	0
23589-3	41	41	10	10	4	2	5	5	5	5	6	3	4	5	5	4	5	2	3	2	3	3	3	2	2	2	2	2	2	2	2	2	2	2	1	1	1	1	1	3	3	1	1	1	1	3	1	1	1
23589-4	40	40	9	9	3	1	4	4	4	4	5	2	3	4	4	3	4	1	2	1	2	2	2	1	1	1	1	1	1	1	1	1	1	1	0	0	0	0	0	2	2	0	0	0	0	2	0	0	0
23589-1T	40	40	9	9	3	1	4	4	4	4	5	2	3	4	4	3	4	1	2	1	2	2	2	1	1	1	1	1	1	1	1	1	1	1	0	0	0	0	0	2	2	0	0	0	0	2	0	0	0
23589-1T	40	40	9	9	3	1	4	4	4	4	5	2	3	4	4	3	4	1	2	1	2	2	2	1	1	1	1	1	1	1	1	1	1	1	0	0	0	0	0	2	2	0	0	0	0	2	0	0	0
22224-3K	39	39	10	10	4	2	5	5	5	5	6	3	4	5	5	4	5	2	3	2	3	3	3	2	2	2	2	2	2	2	2	2	2	2	1	1	1	1	1	3	3	1	1	1	1	3	1	1	1
22224-3T	39	39	10	10	4	2	5	5	5	5	6	3	4	5	5	4	5	2	3	2	3	3	3	2	2	2	2	2	2	2	2	2	2	2	1	1	1	1	1	3	3	1	1	1	1	3	1	1	1
22224-2T	39	39	10	10	4	2	5	5	5	5	6	3	4	5	5	4	5	2	3	2	3	3	3	2	2	2	2	2	2	2	2	2	2	2	1	1	1	1	1	3	3	1	1	1	1	3	1	1	1
22224-4T	39	39	10	10	4	2	5	5	5	5	6	3	4	5	5	4	5	2	3	2	3	3	3	2	2	2	2	2	2	2	2	2	2	2	1	1	1	1	1	3	3	1	1	1	1	3	1	1	1
[truncated: 10 more columns]

## Sheet: M1
Sequence Identity Matrix
M1-nt	20689-27T	20689-28T	18520-2	18520-1	22380	25690	23608	23608-1K	23609	25338-1	25338-2	23458-1K	2968	8028-1	8028-2	3306-1	3306-2	63	21312	25702-2	25827-2	25827-1	25827-3	2755	22684	22477-1	22477-2	23404-2T	23404	23404-4K	23404-4T	23404-2K	61-1	61-2	785	785	913	913	913	25322-205	25322-229	25322-179	23458-5T	23458-4T	23458-2T	22750	22608-1	22608-2T	22608-3T
20689-27T	ID	1	0.955	0.955	0.951	0.953	0.949	0.949	0.949	0.949	0.948	0.953	0.951	0.949	0.949	0.951	0.951	0.953	0.952	0.953	0.952	0.952	0.952	0.953	0.953	0.953	0.953	0.953	0.953	0.953	0.953	0.953	0.955	0.955	0.955	0.955	0.955	0.955	0.955	0.952	0.952	0.955	0.955	0.955	0.955	0.953	0.955	0.955	0.955
20689-28T	1	ID	0.955	0.955	0.951	0.953	0.949	0.949	0.949	0.949	0.948	0.953	0.951	0.949	0.949	0.951	0.951	0.953	0.952	0.953	0.952	0.952	0.952	0.953	0.953	0.953	0.953	0.953	0.953	0.953	0.953	0.953	0.955	0.955	0.955	0.955	0.955	0.955	0.955	0.952	0.952	0.955	0.955	0.955	0.955	0.953	0.955	0.955	0.955
18520-2	0.955	0.955	ID	1	0.984	0.986	0.982	0.982	0.982	0.982	0.981	0.986	0.984	0.982	0.982	0.984	0.984	0.986	0.985	0.986	0.985	0.985	0.985	0.986	0.986	0.986	0.986	0.986	0.986	0.986	0.986	0.986	0.988	0.988	0.988	0.988	0.988	0.988	0.988	0.985	0.985	0.988	0.988	0.988	0.988	0.986	0.988	0.988	0.988
18520-1	0.955	0.955	1	ID	0.984	0.986	0.982	0.982	0.982	0.982	0.981	0.986	0.984	0.982	0.982	0.984	0.984	0.986	0.985	0.986	0.985	0.985	0.985	0.986	0.986	0.986	0.986	0.986	0.986	0.986	0.986	0.986	0.988	0.988	0.988	0.988	0.988	0.988	0.988	0.985	0.985	0.988	0.988	0.988	0.988	0.986	0.988	0.988	0.988
22380	0.951	0.951	0.984	0.984	ID	0.997	0.99	0.99	0.99	0.99	0.989	0.994	0.992	0.99	0.99	0.992	0.992	0.994	0.993	0.994	0.993	0.993	0.993	0.994	0.994	0.994	0.994	0.994	0.994	0.994	0.994	0.994	0.996	0.996	0.996	0.996	0.996	0.996	0.996	0.993	0.993	0.996	0.996	0.996	0.996	0.994	0.996	0.996	0.996
25690	0.953	0.953	0.986	0.986	0.997	ID	0.993	0.993	0.993	0.993	0.992	0.997	0.994	0.993	0.993	0.994	0.994	0.997	0.996	0.997	0.996	0.996	0.996	0.997	0.997	0.997	0.997	0.997	0.997	0.997	0.997	0.997	0.998	0.998	0.998	0.998	0.998	0.998	0.998	0.996	0.996	0.998	0.998	0.998	0.998	0.997	0.998	0.998	0.998
23608	0.949	0.949	0.982	0.982	0.99	0.993	ID	1	1	1	0.998	0.993	0.993	0.992	0.992	0.993	0.993	0.996	0.994	0.996	0.994	0.994	0.994	0.996	0.996	0.996	0.996	0.996	0.996	0.996	0.996	0.996	0.994	0.994	0.994	0.994	0.994	0.994	0.994	0.992	0.992	0.994	0.994	0.994	0.994	0.993	0.994	0.994	0.994
23608-1K	0.949	0.949	0.982	0.982	0.99	0.993	1	ID	1	1	0.998	0.993	0.993	0.992	0.992	0.993	0.993	0.996	0.994	0.996	0.994	0.994	0.994	0.996	0.996	0.996	0.996	0.996	0.996	0.996	0.996	0.996	0.994	0.994	0.994	0.994	0.994	0.994	0.994	0.992	0.992	0.994	0.994	0.994	0.994	0.993	0.994	0.994	0.994
23609	0.949	0.949	0.982	0.982	0.99	0.993	1	1	ID	1	0.998	0.993	0.993	0.992	0.992	0.993	0.993	0.996	0.994	0.996	0.994	0.994	0.994	0.996	0.996	0.996	0.996	0.996	0.996	0.996	0.996	0.996	0.994	0.994	0.994	0.994	0.994	0.994	0.994	0.992	0.992	0.994	0.994	0.994	0.994	0.993	0.994	0.994	0.994
25338-1	0.949	0.949	0.982	0.982	0.99	0.993	1	1	1	ID	0.998	0.993	0.993	0.992	0.992	0.993	0.993	0.996	0.994	0.996	0.994	0.994	0.994	0.996	0.996	0.996	0.996	0.996	0.996	0.996	0.996	0.996	0.994	0.994	0.994	0.994	0.994	0.994	0.994	0.992	0.992	0.994	0.994	0.994	0.994	0.993	0.994	0.994	0.994
25338-2	0.948	0.948	0.981	0.981	0.989	0.992	0.998	0.998	0.998	0.998	ID	0.992	0.992	0.99	0.99	0.992	0.992	0.994	0.993	0.994	0.993	0.993	0.993	0.994	0.994	0.994	0.994	0.994	0.994	0.994	0.994	0.994	0.993	0.993	0.993	0.993	0.993	0.993	0.993	0.99	0.99	0.993	0.993	0.993	0.993	0.992	0.993	0.993	0.993
23458-1K	0.953	0.953	0.986	0.986	0.994	0.997	0.993	0.993	0.993	0.993	0.992	ID	0.994	0.993	0.993	0.994	0.994	0.997	0.996	0.997	0.996	0.996	0.996	0.997	0.997	0.997	0.997	0.997	0.997	0.997	0.997	0.997	0.998	0.998	0.998	0.998	0.998	0.998	0.998	0.996	0.996	0.998	0.998	0.998	0.998	0.998	0.998	0.998	0.998
2968	0.951	0.951	0.984	0.984	0.992	0.994	0.993	0.993	0.993	0.993	0.992	0.994	ID	0.998	0.998	0.994	0.994	0.997	0.996	0.997	0.996	0.996	0.996	0.997	0.997	0.997	0.997	0.997	0.997	0.997	0.997	0.997	0.996	0.996	0.996	0.996	0.996	0.996	0.996	0.993	0.993	0.996	0.996	0.996	0.996	0.994	0.996	0.996	0.996
8028-1	0.949	0.949	0.982	0.982	0.99	0.993	0.992	0.992	0.992	0.992	0.99	0.993	0.998	ID	1	0.993	0.993	0.996	0.994	0.996	0.994	0.994	0.994	0.996	0.996	0.996	0.996	0.996	0.996	0.996	0.996	0.996	0.994	0.994	0.994	0.994	0.994	0.994	0.994	0.992	0.992	0.994	0.994	0.994	0.994	0.993	0.994	0.994	0.994
8028-2	0.949	0.949	0.982	0.982	0.99	0.993	0.992	0.992	0.992	0.992	0.99	0.993	0.998	1	ID	0.993	0.993	0.996	0.994	0.996	0.994	0.994	0.994	0.996	0.996	0.996	0.996	0.996	0.996	0.996	0.996	0.996	0.994	0.994	0.994	0.994	0.994	0.994	0.994	0.992	0.992	0.994	0.994	0.994	0.994	0.993	0.994	0.994	0.994
3306-1	0.951	0.951	0.984	0.984	0.992	0.994	0.993	0.993	0.993	0.993	0.992	0.994	0.994	0.993	0.993	ID	1	0.997	0.996	0.997	0.996	0.996	0.996	0.997	0.997	0.997	0.997	0.997	0.997	0.997	0.997	0.997	0.996	0.996	0.996	0.996	0.996	0.996	0.996	0.993	0.993	0.996	0.996	0.996	0.996	0.994	0.996	0.996	0.996
3306-2	0.951	0.951	0.984	0.984	0.992	0.994	0.993	0.993	0.993	0.993	0.992	0.994	0.994	0.993	0.993	1	ID	0.997	0.996	0.997	0.996	0.996	0.996	0.997	0.997	0.997	0.997	0.997	0.997	0.997	0.997	0.997	0.996	0.996	0.996	0.996	0.996	0.996	0.996	0.993	0.993	0.996	0.996	0.996	0.996	0.994	0.996	0.996	0.996
63	0.953	0.953	0.986	0.986	0.994	0.997	0.996	0.996	0.996	0.996	0.994	0.997	0.997	0.996	0.996	0.997	0.997	ID	0.998	1	0.998	0.998	0.998	1	1	1	1	1	1	1	1	1	0.998	0.998	0.998	0.998	0.998	0.998	0.998	0.996	0.996	0.998	0.998	0.998	0.998	0.997	0.998	0.998	0.998
21312	0.952	0.952	0.985	0.985	0.993	0.996	0.994	0.994	0.994	0.994	0.993	0.996	0.996	0.994	0.994	0.996	0.996	0.998	ID	0.998	0.997	0.997	0.997	0.998	0.998	0.998	0.998	0.998	0.998	0.998	0.998	0.998	0.997	0.997	0.997	0.997	0.997	0.997	0.997	0.994	0.994	0.997	0.997	0.997	0.997	0.996	0.997	0.997	0.997
25702-2	0.953	0.953	0.986	0.986	0.994	0.997	0.996	0.996	0.996	0.996	0.994	0.997	0.997	0.996	0.996	0.997	0.997	1	0.998	ID	0.998	0.998	0.998	1	1	1	1	1	1	1	1	1	0.998	0.998	0.998	0.998	0.998	0.998	0.998	0.996	0.996	0.998	0.998	0.998	0.998	0.997	0.998	0.998	0.998
25827-2	0.952	0.952	0.985	0.985	0.993	0.996	0.994	0.994	0.994	0.994	0.993	0.996	0.996	0.994	0.994	0.996	0.996	0.998	0.997	0.998	ID	1	1	0.998	0.998	0.998	0.998	0.998	0.998	0.998	0.998	0.998	0.997	0.997	0.997	0.997	0.997	0.997	0.997	0.994	0.994	0.997	0.997	0.997	0.997	0.996	0.997	0.997	0.997
25827-1	0.952	0.952	0.985	0.985	0.993	0.996	0.994	0.994	0.994	0.994	0.993	0.996	0.996	0.994	0.994	0.996	0.996	0.998	0.997	0.998	1	ID	1	0.998	0.998	0.998	0.998	0.998	0.998	0.998	0.998	0.998	0.997	0.997	0.997	0.997	0.997	0.997	0.997	0.994	0.994	0.997	0.997	0.997	0.997	0.996	0.997	0.997	0.997
25827-3	0.952	0.952	0.985	0.985	0.993	0.996	0.994	0.994	0.994	0.994	0.993	0.996	0.996	0.994	0.994	0.996	0.996	0.998	0.997	0.998	1	1	ID	0.998	0.998	0.998	0.998	0.998	0.998	0.998	0.998	0.998	0.997	0.997	0.997	0.997	0.997	0.997	0.997	0.994	0.994	0.997	0.997	0.997	0.997	0.996	0.997	0.997	0.997
2755	0.953	0.953	0.986	0.986	0.994	0.997	0.996	0.996	0.996	0.996	0.994	0.997	0.997	0.996	0.996	0.997	0.997	1	0.998	1	0.998	0.998	0.998	ID	1	1	1	1	1	1	1	1	0.998	0.998	0.998	0.998	0.998	0.998	0.998	0.996	0.996	0.998	0.998	0.998	0.998	0.997	0.998	0.998	0.998
22684	0.953	0.953	0.986	0.986	0.994	0.997	0.996	0.996	0.996	0.996	0.994	0.997	0.997	0.996	0.996	0.997	0.997	1	0.998	1	0.998	0.998	0.998	1	ID	1	1	1	1	1	1	1	0.998	0.998	0.998	0.998	0.998	0.998	0.998	0.996	0.996	0.998	0.998	0.998	0.998	0.997	0.998	0.998	0.998
22477-1	0.953	0.953	0.986	0.986	0.994	0.997	0.996	0.996	0.996	0.996	0.994	0.997	0.997	0.996	0.996	0.997	0.997	1	0.998	1	0.998	0.998	0.998	1	1	ID	1	1	1	1	1	1	0.998	0.998	0.998	0.998	0.998	0.998	0.998	0.996	0.996	0.998	0.998	0.998	0.998	0.997	0.998	0.998	0.998
22477-2	0.953	0.953	0.986	0.986	0.994	0.997	0.996	0.996	0.996	0.996	0.994	0.997	0.997	0.996	0.996	0.997	0.997	1	0.998	1	0.998	0.998	0.998	1	1	1	ID	1	1	1	1	1	0.998	0.998	0.998	0.998	0.998	0.998	0.998	0.996	0.996	0.998	0.998	0.998	0.998	0.997	0.998	0.998	0.998
23404-2T	0.953	0.953	0.986	0.986	0.994	0.997	0.996	0.996	0.996	0.996	0.994	0.997	0.997	0.996	0.996	0.997	0.997	1	0.998	1	0.998	0.998	0.998	1	1	1	1	ID	1	1	1	1	0.998	0.998	0.998	0.998	0.998	0.998	0.998	0.996	0.996	0.998	0.998	0.998	0.998	0.997	0.998	0.998	0.998
23404	0.953	0.953	0.986	0.986	0.994	0.997	0.996	0.996	0.996	0.996	0.994	0.997	0.997	0.996	0.996	0.997	0.997	1	0.998	1	0.998	0.998	0.998	1	1	1	1	1	ID	1	1	1	0.998	0.998	0.998	0.998	0.998	0.998	0.998	0.996	0.996	0.998	0.998	0.998	0.998	0.997	0.998	0.998	0.998
23404-4K	0.953	0.953	0.986	0.986	0.994	0.997	0.996	0.996	0.996	0.996	0.994	0.997	0.997	0.996	0.996	0.997	0.997	1	0.998	1	0.998	0.998	0.998	1	1	1	1	1	1	ID	1	1	0.998	0.998	0.998	0.998	0.998	0.998	0.998	0.996	0.996	0.998	0.998	0.998	0.998	0.997	0.998	0.998	0.998
23404-4T	0.953	0.953	0.986	0.986	0.994	0.997	0.996	0.996	0.996	0.996	0.994	0.997	0.997	0.996	0.996	0.997	0.997	1	0.998	1	0.998	0.998	0.998	1	1	1	1	1	1	1	ID	1	0.998	0.998	0.998	0.998	0.998	0.998	0.998	0.996	0.996	0.998	0.998	0.998	0.998	0.997	0.998	0.998	0.998
23404-2K	0.953	0.953	0.986	0.986	0.994	0.997	0.996	0.996	0.996	0.996	0.994	0.997	0.997	0.996	0.996	0.997	0.997	1	0.998	1	0.998	0.998	0.998	1	1	1	1	1	1	1	1	ID	0.998	0.998	0.998	0.998	0.998	0.998	0.998	0.996	0.996	0.998	0.998	0.998	0.998	0.997	0.998	0.998	0.998
61-1	0.955	0.955	0.988	0.988	0.996	0.998	0.994	0.994	0.994	0.994	0.993	0.998	0.996	0.994	0.994	0.996	0.996	0.998	0.997	0.998	0.997	0.997	0.997	0.998	0.998	0.998	0.998	0.998	0.998	0.998	0.998	0.998	ID	1	1	1	1	1	1	0.997	0.997	1	1	1	1	0.998	1	1	1
61-2	0.955	0.955	0.988	0.988	0.996	0.998	0.994	0.994	0.994	0.994	0.993	0.998	0.996	0.994	0.994	0.996	0.996	0.998	0.997	0.998	0.997	0.997	0.997	0.998	0.998	0.998	0.998	0.998	0.998	0.998	0.998	0.998	1	ID	1	1	1	1	1	0.997	0.997	1	1	1	1	0.998	1	1	1
785	0.955	0.955	0.988	0.988	0.996	0.998	0.994	0.994	0.994	0.994	0.993	0.998	0.996	0.994	0.994	0.996	0.996	0.998	0.997	0.998	0.997	0.997	0.997	0.998	0.998	0.998	0.998	0.998	0.998	0.998	0.998	0.998	1	1	ID	1	1	1	1	0.997	0.997	1	1	1	1	0.998	1	1	1
785	0.955	0.955	0.988	0.988	0.996	0.998	0.994	0.994	0.994	0.994	0.993	0.998	0.996	0.994	0.994	0.996	0.996	0.998	0.997	0.998	0.997	0.997	0.997	0.998	0.998	0.998	0.998	0.998	0.998	0.998	0.998	0.998	1	1	1	ID	1	1	1	0.997	0.997	1	1	1	1	0.998	1	1	1
913	0.955	0.955	0.988	0.988	0.996	0.998	0.994	0.994	0.994	0.994	0.993	0.998	0.996	0.994	0.994	0.996	0.996	0.998	0.997	0.998	0.997	0.997	0.997	0.998	0.998	0.998	0.998	0.998	0.998	0.998	0.998	0.998	1	1	1	1	ID	1	1	0.997	0.997	1	1	1	1	0.998	1	1	1
913	0.955	0.955	0.988	0.988	0.996	0.998	0.994	0.994	0.994	0.994	0.993	0.998	0.996	0.994	0.994	0.996	0.996	0.998	0.997	0.998	0.997	0.997	0.997	0.998	0.998	0.998	0.998	0.998	0.998	0.998	0.998	0.998	1	1	1	1	1	ID	1	0.997	0.997	1	1	1	1	0.998	1	1	1
913	0.955	0.955	0.988	0.988	0.996	0.998	0.994	0.994	0.994	0.994	0.993	0.998	0.996	0.994	0.994	0.996	0.996	0.998	0.997	0.998	0.997	0.997	0.997	0.998	0.998	0.998	0.998	0.998	0.998	0.998	0.998	0.998	1	1	1	1	1	1	ID	0.997	0.997	1	1	1	1	0.998	1	1	1
25322-205	0.952	0.952	0.985	0.985	0.993	0.996	0.992	0.992	0.992	0.992	0.99	0.996	0.993	0.992	0.992	0.993	0.993	0.996	0.994	0.996	0.994	0.994	0.994	0.996	0.996	0.996	0.996	0.996	0.996	0.996	0.996	0.996	0.997	0.997	0.997	0.997	0.997	0.997	0.997	ID	1	0.997	0.997	0.997	0.997	0.996	0.997	0.997	0.997
25322-229	0.952	0.952	0.985	0.985	0.993	0.996	0.992	0.992	0.992	0.992	0.99	0.996	0.993	0.992	0.992	0.993	0.993	0.996	0.994	0.996	0.994	0.994	0.994	0.996	0.996	0.996	0.996	0.996	0.996	0.996	0.996	0.996	0.997	0.997	0.997	0.997	0.997	0.997	0.997	1	ID	0.997	0.997	0.997	0.997	0.996	0.997	0.997	0.997
25322-179	0.955	0.955	0.988	0.988	0.996	0.998	0.994	0.994	0.994	0.994	0.993	0.998	0.996	0.994	0.994	0.996	0.996	0.998	0.997	0.998	0.997	0.997	0.997	0.998	0.998	0.998	0.998	0.998	0.998	0.998	0.998	0.998	1	1	1	1	1	1	1	0.997	0.997	ID	1	1	1	0.998	1	1	1
23458-5T	0.955	0.955	0.988	0.988	0.996	0.998	0.994	0.994	0.994	0.994	0.993	0.998	0.996	0.994	0.994	0.996	0.996	0.998	0.997	0.998	0.997	0.997	0.997	0.998	0.998	0.998	0.998	0.998	0.998	0.998	0.998	0.998	1	1	1	1	1	1	1	0.997	0.997	1	ID	1	1	0.998	1	1	1
23458-4T	0.955	0.955	0.988	0.988	0.996	0.998	0.994	0.994	0.994	0.994	0.993	0.998	0.996	0.994	0.994	0.996	0.996	0.998	0.997	0.998	0.997	0.997	0.997	0.998	0.998	0.998	0.998	0.998	0.998	0.998	0.998	0.998	1	1	1	1	1	1	1	0.997	0.997	1	1	ID	1	0.998	1	1	1
23458-2T	0.955	0.955	0.988	0.988	0.996	0.998	0.994	0.994	0.994	0.994	0.993	0.998	0.996	0.994	0.994	0.996	0.996	0.998	0.997	0.998	0.997	0.997	0.997	0.998	0.998	0.998	0.998	0.998	0.998	0.998	0.998	0.998	1	1	1	1	1	1	1	0.997	0.997	1	1	1	ID	0.998	1	1	1
22750	0.953	0.953	0.986	0.986	0.994	0.997	0.993	0.993	0.993	0.993	0.992	0.998	0.994	0.993	0.993	0.994	0.994	0.997	0.996	0.997	0.996	0.996	0.996	0.997	0.997	0.997	0.997	0.997	0.997	0.997	0.997	0.997	0.998	0.998	0.998	0.998	0.998	0.998	0.998	0.996	0.996	0.998	0.998	0.998	0.998	ID	0.998	0.998	0.998
22608-1	0.955	0.955	0.988	0.988	0.996	0.998	0.994	0.994	0.994	0.994	0.993	0.998	0.996	0.994	0.994	0.996	0.996	0.998	0.997	0.998	0.997	0.997	0.997	0.998	0.998	0.998	0.998	0.998	0.998	0.998	0.998	0.998	1	1	1	1	1	1	1	0.997	0.997	1	1	1	1	0.998	ID	1	1
22608-2T	0.955	0.955	0.988	0.988	0.996	0.998	0.994	0.994	0.994	0.994	0.993	0.998	0.996	0.994	0.994	0.996	0.996	0.998	0.997	0.998	0.997	0.997	0.997	0.998	0.998	0.998	0.998	0.998	0.998	0.998	0.998	0.998	1	1	1	1	1	1	1	0.997	0.997	1	1	1	1	0.998	1	ID	1
22608-3T	0.955	0.955	0.988	0.988	0.996	0.998	0.994	0.994	0.994	0.994	0.993	0.998	0.996	0.994	0.994	0.996	0.996	0.998	0.997	0.998	0.997	0.997	0.997	0.998	0.998	0.998	0.998	0.998	0.998	0.998	0.998	0.998	1	1	1	1	1	1	1	0.997	0.997	1	1	1	1	0.998	1	1	ID
22608-2	0.955	0.955	0.988	0.988	0.996	0.998	0.994	0.994	0.994	0.994	0.993	0.998	0.996	0.994	0.994	0.996	0.996	0.998	0.997	0.998	0.997	0.997	0.997	0.998	0.998	0.998	0.998	0.998	0.998	0.998	0.998	0.998	1	1	1	1	1	1	1	0.997	0.997	1	1	1	1	0.998	1	1	1
22608-1T	0.955	0.955	0.988	0.988	0.996	0.998	0.994	0.994	0.994	0.994	0.993	0.998	0.996	0.994	0.994	0.996	0.996	0.998	0.997	0.998	0.997	0.997	0.997	0.998	0.998	0.998	0.998	0.998	0.998	0.998	0.998	0.998	1	1	1	1	1	1	1	0.997	0.997	1	1	1	1	0.998	1	1	1
23589-3	0.955	0.955	0.988	0.988	0.996	0.998	0.994	0.994	0.994	0.994	0.993	0.998	0.996	0.994	0.994	0.996	0.996	0.998	0.997	0.998	0.997	0.997	0.997	0.998	0.998	0.998	0.998	0.998	0.998	0.998	0.998	0.998	1	1	1	1	1	1	1	0.997	0.997	1	1	1	1	0.998	1	1	1
23589-4	0.955	0.955	0.988	0.988	0.996	0.998	0.994	0.994	0.994	0.994	0.993	0.998	0.996	0.994	0.994	0.996	0.996	0.998	0.997	0.998	0.997	0.997	0.997	0.998	0.998	0.998	0.998	0.998	0.998	0.998	0.998	0.998	1	1	1	1	1	1	1	0.997	0.997	1	1	1	1	0.998	1	1	1
23589-1T	0.955	0.955	0.988	0.988	0.996	0.998	0.994	0.994	0.994	0.994	0.993	0.998	0.996	0.994	0.994	0.996	0.996	0.998	0.997	0.998	0.997	0.997	0.997	0.998	0.998	0.998	0.998	0.998	0.998	0.998	0.998	0.998	1	1	1	1	1	1	1	0.997	0.997	1	1	1	1	0.998	1	1	1
23589-1T	0.955	0.955	0.988	0.988	0.996	0.998	0.994	0.994	0.994	0.994	0.993	0.998	0.996	0.994	0.994	0.996	0.996	0.998	0.997	0.998	0.997	0.997	0.997	0.998	0.998	0.998	0.998	0.998	0.998	0.998	0.998	0.998	1	1	1	1	1	1	1	0.997	0.997	1	1	1	1	0.998	1	1	1
22224-3K	0.956	0.956	0.986	0.986	0.994	0.997	0.993	0.993	0.993	0.993	0.992	0.997	0.994	0.993	0.993	0.994	0.994	0.997	0.996	0.997	0.996	0.996	0.996	0.997	0.997	0.997	0.997	0.997	0.997	0.997	0.997	0.997	0.998	0.998	0.998	0.998	0.998	0.998	0.998	0.996	0.996	0.998	0.998	0.998	0.998	0.997	0.998	0.998	0.998
22224-3T	0.956	0.956	0.986	0.986	0.994	0.997	0.993	0.993	0.993	0.993	0.992	0.997	0.994	0.993	0.993	0.994	0.994	0.997	0.996	0.997	0.996	0.996	0.996	0.997	0.997	0.997	0.997	0.997	0.997	0.997	0.997	0.997	0.998	0.998	0.998	0.998	0.998	0.998	0.998	0.996	0.996	0.998	0.998	0.998	0.998	0.997	0.998	0.998	0.998
22224-2T	0.956	0.956	0.986	0.986	0.994	0.997	0.993	0.993	0.993	0.993	0.992	0.997	0.994	0.993	0.993	0.994	0.994	0.997	0.996	0.997	0.996	0.996	0.996	0.997	0.997	0.997	0.997	0.997	0.997	0.997	0.997	0.997	0.998	0.998	0.998	0.998	0.998	0.998	0.998	0.996	0.996	0.998	0.998	0.998	0.998	0.997	0.998	0.998	0.998
22224-4T	0.956	0.956	0.986	0.986	0.994	0.997	0.993	0.993	0.993	0.993	0.992	0.997	0.994	0.993	0.993	0.994	0.994	0.997	0.996	0.997	0.996	0.996	0.996	0.997	0.997	0.997	0.997	0.997	0.997	0.997	0.997	0.997	0.998	0.998	0.998	0.998	0.998	0.998	0.998	0.996	0.996	0.998	0.998	0.998	0.998	0.997	0.998	0.998	0.998
Sequence Difference Count Matrix
M1-nt	20689-27T	20689-28T	18520-2	18520-1	22380	25690	23608	23608-1K	23609	25338-1	25338-2	23458-1K	2968	8028-1	8028-2	3306-1	3306-2	63	21312	25702-2	25827-2	25827-1	25827-3	2755	22684	22477-1	22477-2	23404-2T	23404	23404-4K	23404-4T	23404-2K	61-1	61-2	785	785	913	913	913	25322-205	25322-229	25322-179	23458-5T	23458-4T	23458-2T	22750	22608-1	22608-2T	22608-3T
20689-27T	ID	0	34	34	37	35	38	38	38	38	39	35	37	38	38	37	37	35	36	35	36	36	36	35	35	35	35	35	35	35	35	35	34	34	34	34	34	34	34	36	36	34	34	34	34	35	34	34	34
20689-28T	0	ID	34	34	37	35	38	38	38	38	39	35	37	38	38	37	37	35	36	35	36	36	36	35	35	35	35	35	35	35	35	35	34	34	34	34	34	34	34	36	36	34	34	34	34	35	34	34	34
18520-2	34	34	ID	0	12	10	13	13	13	13	14	10	12	13	13	12	12	10	11	10	11	11	11	10	10	10	10	10	10	10	10	10	9	9	9	9	9	9	9	11	11	9	9	9	9	10	9	9	9
18520-1	34	34	0	ID	12	10	13	13	13	13	14	10	12	13	13	12	12	10	11	10	11	11	11	10	10	10	10	10	10	10	10	10	9	9	9	9	9	9	9	11	11	9	9	9	9	10	9	9	9
22380	37	37	12	12	ID	2	7	7	7	7	8	4	6	7	7	6	6	4	5	4	5	5	5	4	4	4	4	4	4	4	4	4	3	3	3	3	3	3	3	5	5	3	3	3	3	4	3	3	3
25690	35	35	10	10	2	ID	5	5	5	5	6	2	4	5	5	4	4	2	3	2	3	3	3	2	2	2	2	2	2	2	2	2	1	1	1	1	1	1	1	3	3	1	1	1	1	2	1	1	1
23608	38	38	13	13	7	5	ID	0	0	0	1	5	5	6	6	5	5	3	4	3	4	4	4	3	3	3	3	3	3	3	3	3	4	4	4	4	4	4	4	6	6	4	4	4	4	5	4	4	4
23608-1K	38	38	13	13	7	5	0	ID	0	0	1	5	5	6	6	5	5	3	4	3	4	4	4	3	3	3	3	3	3	3	3	3	4	4	4	4	4	4	4	6	6	4	4	4	4	5	4	4	4
23609	38	38	13	13	7	5	0	0	ID	0	1	5	5	6	6	5	5	3	4	3	4	4	4	3	3	3	3	3	3	3	3	3	4	4	4	4	4	4	4	6	6	4	4	4	4	5	4	4	4
25338-1	38	38	13	13	7	5	0	0	0	ID	1	5	5	6	6	5	5	3	4	3	4	4	4	3	3	3	3	3	3	3	3	3	4	4	4	4	4	4	4	6	6	4	4	4	4	5	4	4	4
25338-2	39	39	14	14	8	6	1	1	1	1	ID	6	6	7	7	6	6	4	5	4	5	5	5	4	4	4	4	4	4	4	4	4	5	5	5	5	5	5	5	7	7	5	5	5	5	6	5	5	5
23458-1K	35	35	10	10	4	2	5	5	5	5	6	ID	4	5	5	4	4	2	3	2	3	3	3	2	2	2	2	2	2	2	2	2	1	1	1	1	1	1	1	3	3	1	1	1	1	1	1	1	1
2968	37	37	12	12	6	4	5	5	5	5	6	4	ID	1	1	4	4	2	3	2	3	3	3	2	2	2	2	2	2	2	2	2	3	3	3	3	3	3	3	5	5	3	3	3	3	4	3	3	3
8028-1	38	38	13	13	7	5	6	6	6	6	7	5	1	ID	0	5	5	3	4	3	4	4	4	3	3	3	3	3	3	3	3	3	4	4	4	4	4	4	4	6	6	4	4	4	4	5	4	4	4
8028-2	38	38	13	13	7	5	6	6	6	6	7	5	1	0	ID	5	5	3	4	3	4	4	4	3	3	3	3	3	3	3	3	3	4	4	4	4	4	4	4	6	6	4	4	4	4	5	4	4	4
3306-1	37	37	12	12	6	4	5	5	5	5	6	4	4	5	5	ID	0	2	3	2	3	3	3	2	2	2	2	2	2	2	2	2	3	3	3	3	3	3	3	5	5	3	3	3	3	4	3	3	3
3306-2	37	37	12	12	6	4	5	5	5	5	6	4	4	5	5	0	ID	2	3	2	3	3	3	2	2	2	2	2	2	2	2	2	3	3	3	3	3	3	3	5	5	3	3	3	3	4	3	3	3
63	35	35	10	10	4	2	3	3	3	3	4	2	2	3	3	2	2	ID	1	0	1	1	1	0	0	0	0	0	0	0	0	0	1	1	1	1	1	1	1	3	3	1	1	1	1	2	1	1	1
21312	36	36	11	11	5	3	4	4	4	4	5	3	3	4	4	3	3	1	ID	1	2	2	2	1	1	1	1	1	1	1	1	1	2	2	2	2	2	2	2	4	4	2	2	2	2	3	2	2	2
25702-2	35	35	10	10	4	2	3	3	3	3	4	2	2	3	3	2	2	0	1	ID	1	1	1	0	0	0	0	0	0	0	0	0	1	1	1	1	1	1	1	3	3	1	1	1	1	2	1	1	1
25827-2	36	36	11	11	5	3	4	4	4	4	5	3	3	4	4	3	3	1	2	1	ID	0	0	1	1	1	1	1	1	1	1	1	2	2	2	2	2	2	2	4	4	2	2	2	2	3	2	2	2
25827-1	36	36	11	11	5	3	4	4	4	4	5	3	3	4	4	3	3	1	2	1	0	ID	0	1	1	1	1	1	1	1	1	1	2	2	2	2	2	2	2	4	4	2	2	2	2	3	2	2	2
25827-3	36	36	11	11	5	3	4	4	4	4	5	3	3	4	4	3	3	1	2	1	0	0	ID	1	1	1	1	1	1	1	1	1	2	2	2	2	2	2	2	4	4	2	2	2	2	3	2	2	2
2755	35	35	10	10	4	2	3	3	3	3	4	2	2	3	3	2	2	0	1	0	1	1	1	ID	0	0	0	0	0	0	0	0	1	1	1	1	1	1	1	3	3	1	1	1	1	2	1	1	1
22684	35	35	10	10	4	2	3	3	3	3	4	2	2	3	3	2	2	0	1	0	1	1	1	0	ID	0	0	0	0	0	0	0	1	1	1	1	1	1	1	3	3	1	1	1	1	2	1	1	1
22477-1	35	35	10	10	4	2	3	3	3	3	4	2	2	3	3	2	2	0	1	0	1	1	1	0	0	ID	0	0	0	0	0	0	1	1	1	1	1	1	1	3	3	1	1	1	1	2	1	1	1
22477-2	35	35	10	10	4	2	3	3	3	3	4	2	2	3	3	2	2	0	1	0	1	1	1	0	0	0	ID	0	0	0	0	0	1	1	1	1	1	1	1	3	3	1	1	1	1	2	1	1	1
23404-2T	35	35	10	10	4	2	3	3	3	3	4	2	2	3	3	2	2	0	1	0	1	1	1	0	0	0	0	ID	0	0	0	0	1	1	1	1	1	1	1	3	3	1	1	1	1	2	1	1	1
23404	35	35	10	10	4	2	3	3	3	3	4	2	2	3	3	2	2	0	1	0	1	1	1	0	0	0	0	0	ID	0	0	0	1	1	1	1	1	1	1	3	3	1	1	1	1	2	1	1	1
23404-4K	35	35	10	10	4	2	3	3	3	3	4	2	2	3	3	2	2	0	1	0	1	1	1	0	0	0	0	0	0	ID	0	0	1	1	1	1	1	1	1	3	3	1	1	1	1	2	1	1	1
23404-4T	35	35	10	10	4	2	3	3	3	3	4	2	2	3	3	2	2	0	1	0	1	1	1	0	0	0	0	0	0	0	ID	0	1	1	1	1	1	1	1	3	3	1	1	1	1	2	1	1	1
23404-2K	35	35	10	10	4	2	3	3	3	3	4	2	2	3	3	2	2	0	1	0	1	1	1	0	0	0	0	0	0	0	0	ID	1	1	1	1	1	1	1	3	3	1	1	1	1	2	1	1	1
61-1	34	34	9	9	3	1	4	4	4	4	5	1	3	4	4	3	3	1	2	1	2	2	2	1	1	1	1	1	1	1	1	1	ID	0	0	0	0	0	0	2	2	0	0	0	0	1	0	0	0
61-2	34	34	9	9	3	1	4	4	4	4	5	1	3	4	4	3	3	1	2	1	2	2	2	1	1	1	1	1	1	1	1	1	0	ID	0	0	0	0	0	2	2	0	0	0	0	1	0	0	0
785	34	34	9	9	3	1	4	4	4	4	5	1	3	4	4	3	3	1	2	1	2	2	2	1	1	1	1	1	1	1	1	1	0	0	ID	0	0	0	0	2	2	0	0	0	0	1	0	0	0
785	34	34	9	9	3	1	4	4	4	4	5	1	3	4	4	3	3	1	2	1	2	2	2	1	1	1	1	1	1	1	1	1	0	0	0	ID	0	0	0	2	2	0	0	0	0	1	0	0	0
913	34	34	9	9	3	1	4	4	4	4	5	1	3	4	4	3	3	1	2	1	2	2	2	1	1	1	1	1	1	1	1	1	0	0	0	0	ID	0	0	2	2	0	0	0	0	1	0	0	0
913	34	34	9	9	3	1	4	4	4	4	5	1	3	4	4	3	3	1	2	1	2	2	2	1	1	1	1	1	1	1	1	1	0	0	0	0	0	ID	0	2	2	0	0	0	0	1	0	0	0
913	34	34	9	9	3	1	4	4	4	4	5	1	3	4	4	3	3	1	2	1	2	2	2	1	1	1	1	1	1	1	1	1	0	0	0	0	0	0	ID	2	2	0	0	0	0	1	0	0	0
25322-205	36	36	11	11	5	3	6	6	6	6	7	3	5	6	6	5	5	3	4	3	4	4	4	3	3	3	3	3	3	3	3	3	2	2	2	2	2	2	2	ID	0	2	2	2	2	3	2	2	2
25322-229	36	36	11	11	5	3	6	6	6	6	7	3	5	6	6	5	5	3	4	3	4	4	4	3	3	3	3	3	3	3	3	3	2	2	2	2	2	2	2	0	ID	2	2	2	2	3	2	2	2
25322-179	34	34	9	9	3	1	4	4	4	4	5	1	3	4	4	3	3	1	2	1	2	2	2	1	1	1	1	1	1	1	1	1	0	0	0	0	0	0	0	2	2	ID	0	0	0	1	0	0	0
23458-5T	34	34	9	9	3	1	4	4	4	4	5	1	3	4	4	3	3	1	2	1	2	2	2	1	1	1	1	1	1	1	1	1	0	0	0	0	0	0	0	2	2	0	ID	0	0	1	0	0	0
23458-4T	34	34	9	9	3	1	4	4	4	4	5	1	3	4	4	3	3	1	2	1	2	2	2	1	1	1	1	1	1	1	1	1	0	0	0	0	0	0	0	2	2	0	0	ID	0	1	0	0	0
23458-2T	34	34	9	9	3	1	4	4	4	4	5	1	3	4	4	3	3	1	2	1	2	2	2	1	1	1	1	1	1	1	1	1	0	0	0	0	0	0	0	2	2	0	0	0	ID	1	0	0	0
22750	35	35	10	10	4	2	5	5	5	5	6	1	4	5	5	4	4	2	3	2	3	3	3	2	2	2	2	2	2	2	2	2	1	1	1	1	1	1	1	3	3	1	1	1	1	ID	1	1	1
22608-1	34	34	9	9	3	1	4	4	4	4	5	1	3	4	4	3	3	1	2	1	2	2	2	1	1	1	1	1	1	1	1	1	0	0	0	0	0	0	0	2	2	0	0	0	0	1	ID	0	0
22608-2T	34	34	9	9	3	1	4	4	4	4	5	1	3	4	4	3	3	1	2	1	2	2	2	1	1	1	1	1	1	1	1	1	0	0	0	0	0	0	0	2	2	0	0	0	0	1	0	ID	0
22608-3T	34	34	9	9	3	1	4	4	4	4	5	1	3	4	4	3	3	1	2	1	2	2	2	1	1	1	1	1	1	1	1	1	0	0	0	0	0	0	0	2	2	0	0	0	0	1	0	0	ID
22608-2	34	34	9	9	3	1	4	4	4	4	5	1	3	4	4	3	3	1	2	1	2	2	2	1	1	1	1	1	1	1	1	1	0	0	0	0	0	0	0	2	2	0	0	0	0	1	0	0	0
22608-1T	34	34	9	9	3	1	4	4	4	4	5	1	3	4	4	3	3	1	2	1	2	2	2	1	1	1	1	1	1	1	1	1	0	0	0	0	0	0	0	2	2	0	0	0	0	1	0	0	0
23589-3	34	34	9	9	3	1	4	4	4	4	5	1	3	4	4	3	3	1	2	1	2	2	2	1	1	1	1	1	1	1	1	1	0	0	0	0	0	0	0	2	2	0	0	0	0	1	0	0	0
23589-4	34	34	9	9	3	1	4	4	4	4	5	1	3	4	4	3	3	1	2	1	2	2	2	1	1	1	1	1	1	1	1	1	0	0	0	0	0	0	0	2	2	0	0	0	0	1	0	0	0
23589-1T	34	34	9	9	3	1	4	4	4	4	5	1	3	4	4	3	3	1	2	1	2	2	2	1	1	1	1	1	1	1	1	1	0	0	0	0	0	0	0	2	2	0	0	0	0	1	0	0	0
23589-1T	34	34	9	9	3	1	4	4	4	4	5	1	3	4	4	3	3	1	2	1	2	2	2	1	1	1	1	1	1	1	1	1	0	0	0	0	0	0	0	2	2	0	0	0	0	1	0	0	0
22224-3K	33	33	10	10	4	2	5	5	5	5	6	2	4	5	5	4	4	2	3	2	3	3	3	2	2	2	2	2	2	2	2	2	1	1	1	1	1	1	1	3	3	1	1	1	1	2	1	1	1
22224-3T	33	33	10	10	4	2	5	5	5	5	6	2	4	5	5	4	4	2	3	2	3	3	3	2	2	2	2	2	2	2	2	2	1	1	1	1	1	1	1	3	3	1	1	1	1	2	1	1	1
22224-2T	33	33	10	10	4	2	5	5	5	5	6	2	4	5	5	4	4	2	3	2	3	3	3	2	2	2	2	2	2	2	2	2	1	1	1	1	1	1	1	3	3	1	1	1	1	2	1	1	1
22224-4T	33	33	10	10	4	2	5	5	5	5	6	2	4	5	5	4	4	2	3	2	3	3	3	2	2	2	2	2	2	2	2	2	1	1	1	1	1	1	1	3	3	1	1	1	1	2	1	1	1
[truncated: 70 more columns]

## Sheet: M2
Sequence Identity Matrix
M2-nt	20689-27T	20689-28T	18520-2	18520-1	22380	25690	23608	23608-1K	23609	23458-1K	25338-1	25338-2	2968	8028-1	8028-2	3306-1	3306-2	63	21312	25702-2	25827-2	25827-1	25827-3	2755	22684	22477-1	22477-2	23404-2T	23404	23404-4K	23404-4T	23404-2K	61-1	61-2	785	785	913	913	913	25322-205	25322-229	25322-179	23458-5T	23458-4T	23458-2T	22750	22608-1	22608-2T	22608-3T
20689-27T	ID	1	0.972	0.972	0.972	0.972	0.972	0.972	0.972	0.965	0.972	0.969	0.972	0.969	0.969	0.972	0.969	0.972	0.972	0.972	0.972	0.972	0.972	0.972	0.972	0.972	0.972	0.972	0.972	0.972	0.972	0.972	0.976	0.976	0.972	0.972	0.972	0.972	0.972	0.969	0.969	0.972	0.972	0.972	0.972	0.965	0.972	0.972	0.972
20689-28T	1	ID	0.972	0.972	0.972	0.972	0.972	0.972	0.972	0.965	0.972	0.969	0.972	0.969	0.969	0.972	0.969	0.972	0.972	0.972	0.972	0.972	0.972	0.972	0.972	0.972	0.972	0.972	0.972	0.972	0.972	0.972	0.976	0.976	0.972	0.972	0.972	0.972	0.972	0.969	0.969	0.972	0.972	0.972	0.972	0.965	0.972	0.972	0.972
18520-2	0.972	0.972	ID	1	1	1	1	1	1	0.993	1	0.996	1	0.996	0.996	1	0.996	1	1	1	1	1	1	1	1	1	1	1	1	1	1	1	0.996	0.996	1	1	1	1	1	0.996	0.996	1	1	1	1	0.993	1	1	1
18520-1	0.972	0.972	1	ID	1	1	1	1	1	0.993	1	0.996	1	0.996	0.996	1	0.996	1	1	1	1	1	1	1	1	1	1	1	1	1	1	1	0.996	0.996	1	1	1	1	1	0.996	0.996	1	1	1	1	0.993	1	1	1
22380	0.972	0.972	1	1	ID	1	1	1	1	0.993	1	0.996	1	0.996	0.996	1	0.996	1	1	1	1	1	1	1	1	1	1	1	1	1	1	1	0.996	0.996	1	1	1	1	1	0.996	0.996	1	1	1	1	0.993	1	1	1
25690	0.972	0.972	1	1	1	ID	1	1	1	0.993	1	0.996	1	0.996	0.996	1	0.996	1	1	1	1	1	1	1	1	1	1	1	1	1	1	1	0.996	0.996	1	1	1	1	1	0.996	0.996	1	1	1	1	0.993	1	1	1
23608	0.972	0.972	1	1	1	1	ID	1	1	0.993	1	0.996	1	0.996	0.996	1	0.996	1	1	1	1	1	1	1	1	1	1	1	1	1	1	1	0.996	0.996	1	1	1	1	1	0.996	0.996	1	1	1	1	0.993	1	1	1
23608-1K	0.972	0.972	1	1	1	1	1	ID	1	0.993	1	0.996	1	0.996	0.996	1	0.996	1	1	1	1	1	1	1	1	1	1	1	1	1	1	1	0.996	0.996	1	1	1	1	1	0.996	0.996	1	1	1	1	0.993	1	1	1
23609	0.972	0.972	1	1	1	1	1	1	ID	0.993	1	0.996	1	0.996	0.996	1	0.996	1	1	1	1	1	1	1	1	1	1	1	1	1	1	1	0.996	0.996	1	1	1	1	1	0.996	0.996	1	1	1	1	0.993	1	1	1
23458-1K	0.965	0.965	0.993	0.993	0.993	0.993	0.993	0.993	0.993	ID	0.993	0.989	0.993	0.989	0.989	0.993	0.989	0.993	0.993	0.993	0.993	0.993	0.993	0.993	0.993	0.993	0.993	0.993	0.993	0.993	0.993	0.993	0.989	0.989	0.993	0.993	0.993	0.993	0.993	0.989	0.989	0.993	0.993	0.993	0.993	0.993	0.993	0.993	0.993
25338-1	0.972	0.972	1	1	1	1	1	1	1	0.993	ID	0.996	1	0.996	0.996	1	0.996	1	1	1	1	1	1	1	1	1	1	1	1	1	1	1	0.996	0.996	1	1	1	1	1	0.996	0.996	1	1	1	1	0.993	1	1	1
25338-2	0.969	0.969	0.996	0.996	0.996	0.996	0.996	0.996	0.996	0.989	0.996	ID	0.996	0.993	0.993	0.996	0.993	0.996	0.996	0.996	0.996	0.996	0.996	0.996	0.996	0.996	0.996	0.996	0.996	0.996	0.996	0.996	0.993	0.993	0.996	0.996	0.996	0.996	0.996	0.993	0.993	0.996	0.996	0.996	0.996	0.989	0.996	0.996	0.996
2968	0.972	0.972	1	1	1	1	1	1	1	0.993	1	0.996	ID	0.996	0.996	1	0.996	1	1	1	1	1	1	1	1	1	1	1	1	1	1	1	0.996	0.996	1	1	1	1	1	0.996	0.996	1	1	1	1	0.993	1	1	1
8028-1	0.969	0.969	0.996	0.996	0.996	0.996	0.996	0.996	0.996	0.989	0.996	0.993	0.996	ID	1	0.996	0.993	0.996	0.996	0.996	0.996	0.996	0.996	0.996	0.996	0.996	0.996	0.996	0.996	0.996	0.996	0.996	0.993	0.993	0.996	0.996	0.996	0.996	0.996	0.993	0.993	0.996	0.996	0.996	0.996	0.989	0.996	0.996	0.996
8028-2	0.969	0.969	0.996	0.996	0.996	0.996	0.996	0.996	0.996	0.989	0.996	0.993	0.996	1	ID	0.996	0.993	0.996	0.996	0.996	0.996	0.996	0.996	0.996	0.996	0.996	0.996	0.996	0.996	0.996	0.996	0.996	0.993	0.993	0.996	0.996	0.996	0.996	0.996	0.993	0.993	0.996	0.996	0.996	0.996	0.989	0.996	0.996	0.996
3306-1	0.972	0.972	1	1	1	1	1	1	1	0.993	1	0.996	1	0.996	0.996	ID	0.996	1	1	1	1	1	1	1	1	1	1	1	1	1	1	1	0.996	0.996	1	1	1	1	1	0.996	0.996	1	1	1	1	0.993	1	1	1
3306-2	0.969	0.969	0.996	0.996	0.996	0.996	0.996	0.996	0.996	0.989	0.996	0.993	0.996	0.993	0.993	0.996	ID	0.996	0.996	0.996	0.996	0.996	0.996	0.996	0.996	0.996	0.996	0.996	0.996	0.996	0.996	0.996	0.993	0.993	0.996	0.996	0.996	0.996	0.996	0.993	0.993	0.996	0.996	0.996	0.996	0.989	0.996	0.996	0.996
63	0.972	0.972	1	1	1	1	1	1	1	0.993	1	0.996	1	0.996	0.996	1	0.996	ID	1	1	1	1	1	1	1	1	1	1	1	1	1	1	0.996	0.996	1	1	1	1	1	0.996	0.996	1	1	1	1	0.993	1	1	1
21312	0.972	0.972	1	1	1	1	1	1	1	0.993	1	0.996	1	0.996	0.996	1	0.996	1	ID	1	1	1	1	1	1	1	1	1	1	1	1	1	0.996	0.996	1	1	1	1	1	0.996	0.996	1	1	1	1	0.993	1	1	1
25702-2	0.972	0.972	1	1	1	1	1	1	1	0.993	1	0.996	1	0.996	0.996	1	0.996	1	1	ID	1	1	1	1	1	1	1	1	1	1	1	1	0.996	0.996	1	1	1	1	1	0.996	0.996	1	1	1	1	0.993	1	1	1
25827-2	0.972	0.972	1	1	1	1	1	1	1	0.993	1	0.996	1	0.996	0.996	1	0.996	1	1	1	ID	1	1	1	1	1	1	1	1	1	1	1	0.996	0.996	1	1	1	1	1	0.996	0.996	1	1	1	1	0.993	1	1	1
25827-1	0.972	0.972	1	1	1	1	1	1	1	0.993	1	0.996	1	0.996	0.996	1	0.996	1	1	1	1	ID	1	1	1	1	1	1	1	1	1	1	0.996	0.996	1	1	1	1	1	0.996	0.996	1	1	1	1	0.993	1	1	1
25827-3	0.972	0.972	1	1	1	1	1	1	1	0.993	1	0.996	1	0.996	0.996	1	0.996	1	1	1	1	1	ID	1	1	1	1	1	1	1	1	1	0.996	0.996	1	1	1	1	1	0.996	0.996	1	1	1	1	0.993	1	1	1
2755	0.972	0.972	1	1	1	1	1	1	1	0.993	1	0.996	1	0.996	0.996	1	0.996	1	1	1	1	1	1	ID	1	1	1	1	1	1	1	1	0.996	0.996	1	1	1	1	1	0.996	0.996	1	1	1	1	0.993	1	1	1
22684	0.972	0.972	1	1	1	1	1	1	1	0.993	1	0.996	1	0.996	0.996	1	0.996	1	1	1	1	1	1	1	ID	1	1	1	1	1	1	1	0.996	0.996	1	1	1	1	1	0.996	0.996	1	1	1	1	0.993	1	1	1
22477-1	0.972	0.972	1	1	1	1	1	1	1	0.993	1	0.996	1	0.996	0.996	1	0.996	1	1	1	1	1	1	1	1	ID	1	1	1	1	1	1	0.996	0.996	1	1	1	1	1	0.996	0.996	1	1	1	1	0.993	1	1	1
22477-2	0.972	0.972	1	1	1	1	1	1	1	0.993	1	0.996	1	0.996	0.996	1	0.996	1	1	1	1	1	1	1	1	1	ID	1	1	1	1	1	0.996	0.996	1	1	1	1	1	0.996	0.996	1	1	1	1	0.993	1	1	1
23404-2T	0.972	0.972	1	1	1	1	1	1	1	0.993	1	0.996	1	0.996	0.996	1	0.996	1	1	1	1	1	1	1	1	1	1	ID	1	1	1	1	0.996	0.996	1	1	1	1	1	0.996	0.996	1	1	1	1	0.993	1	1	1
23404	0.972	0.972	1	1	1	1	1	1	1	0.993	1	0.996	1	0.996	0.996	1	0.996	1	1	1	1	1	1	1	1	1	1	1	ID	1	1	1	0.996	0.996	1	1	1	1	1	0.996	0.996	1	1	1	1	0.993	1	1	1
23404-4K	0.972	0.972	1	1	1	1	1	1	1	0.993	1	0.996	1	0.996	0.996	1	0.996	1	1	1	1	1	1	1	1	1	1	1	1	ID	1	1	0.996	0.996	1	1	1	1	1	0.996	0.996	1	1	1	1	0.993	1	1	1
23404-4T	0.972	0.972	1	1	1	1	1	1	1	0.993	1	0.996	1	0.996	0.996	1	0.996	1	1	1	1	1	1	1	1	1	1	1	1	1	ID	1	0.996	0.996	1	1	1	1	1	0.996	0.996	1	1	1	1	0.993	1	1	1
23404-2K	0.972	0.972	1	1	1	1	1	1	1	0.993	1	0.996	1	0.996	0.996	1	0.996	1	1	1	1	1	1	1	1	1	1	1	1	1	1	ID	0.996	0.996	1	1	1	1	1	0.996	0.996	1	1	1	1	0.993	1	1	1
61-1	0.976	0.976	0.996	0.996	0.996	0.996	0.996	0.996	0.996	0.989	0.996	0.993	0.996	0.993	0.993	0.996	0.993	0.996	0.996	0.996	0.996	0.996	0.996	0.996	0.996	0.996	0.996	0.996	0.996	0.996	0.996	0.996	ID	1	0.996	0.996	0.996	0.996	0.996	0.993	0.993	0.996	0.996	0.996	0.996	0.989	0.996	0.996	0.996
61-2	0.976	0.976	0.996	0.996	0.996	0.996	0.996	0.996	0.996	0.989	0.996	0.993	0.996	0.993	0.993	0.996	0.993	0.996	0.996	0.996	0.996	0.996	0.996	0.996	0.996	0.996	0.996	0.996	0.996	0.996	0.996	0.996	1	ID	0.996	0.996	0.996	0.996	0.996	0.993	0.993	0.996	0.996	0.996	0.996	0.989	0.996	0.996	0.996
785	0.972	0.972	1	1	1	1	1	1	1	0.993	1	0.996	1	0.996	0.996	1	0.996	1	1	1	1	1	1	1	1	1	1	1	1	1	1	1	0.996	0.996	ID	1	1	1	1	0.996	0.996	1	1	1	1	0.993	1	1	1
785	0.972	0.972	1	1	1	1	1	1	1	0.993	1	0.996	1	0.996	0.996	1	0.996	1	1	1	1	1	1	1	1	1	1	1	1	1	1	1	0.996	0.996	1	ID	1	1	1	0.996	0.996	1	1	1	1	0.993	1	1	1
913	0.972	0.972	1	1	1	1	1	1	1	0.993	1	0.996	1	0.996	0.996	1	0.996	1	1	1	1	1	1	1	1	1	1	1	1	1	1	1	0.996	0.996	1	1	ID	1	1	0.996	0.996	1	1	1	1	0.993	1	1	1
913	0.972	0.972	1	1	1	1	1	1	1	0.993	1	0.996	1	0.996	0.996	1	0.996	1	1	1	1	1	1	1	1	1	1	1	1	1	1	1	0.996	0.996	1	1	1	ID	1	0.996	0.996	1	1	1	1	0.993	1	1	1
913	0.972	0.972	1	1	1	1	1	1	1	0.993	1	0.996	1	0.996	0.996	1	0.996	1	1	1	1	1	1	1	1	1	1	1	1	1	1	1	0.996	0.996	1	1	1	1	ID	0.996	0.996	1	1	1	1	0.993	1	1	1
25322-205	0.969	0.969	0.996	0.996	0.996	0.996	0.996	0.996	0.996	0.989	0.996	0.993	0.996	0.993	0.993	0.996	0.993	0.996	0.996	0.996	0.996	0.996	0.996	0.996	0.996	0.996	0.996	0.996	0.996	0.996	0.996	0.996	0.993	0.993	0.996	0.996	0.996	0.996	0.996	ID	1	0.996	0.996	0.996	0.996	0.989	0.996	0.996	0.996
25322-229	0.969	0.969	0.996	0.996	0.996	0.996	0.996	0.996	0.996	0.989	0.996	0.993	0.996	0.993	0.993	0.996	0.993	0.996	0.996	0.996	0.996	0.996	0.996	0.996	0.996	0.996	0.996	0.996	0.996	0.996	0.996	0.996	0.993	0.993	0.996	0.996	0.996	0.996	0.996	1	ID	0.996	0.996	0.996	0.996	0.989	0.996	0.996	0.996
25322-179	0.972	0.972	1	1	1	1	1	1	1	0.993	1	0.996	1	0.996	0.996	1	0.996	1	1	1	1	1	1	1	1	1	1	1	1	1	1	1	0.996	0.996	1	1	1	1	1	0.996	0.996	ID	1	1	1	0.993	1	1	1
23458-5T	0.972	0.972	1	1	1	1	1	1	1	0.993	1	0.996	1	0.996	0.996	1	0.996	1	1	1	1	1	1	1	1	1	1	1	1	1	1	1	0.996	0.996	1	1	1	1	1	0.996	0.996	1	ID	1	1	0.993	1	1	1
23458-4T	0.972	0.972	1	1	1	1	1	1	1	0.993	1	0.996	1	0.996	0.996	1	0.996	1	1	1	1	1	1	1	1	1	1	1	1	1	1	1	0.996	0.996	1	1	1	1	1	0.996	0.996	1	1	ID	1	0.993	1	1	1
23458-2T	0.972	0.972	1	1	1	1	1	1	1	0.993	1	0.996	1	0.996	0.996	1	0.996	1	1	1	1	1	1	1	1	1	1	1	1	1	1	1	0.996	0.996	1	1	1	1	1	0.996	0.996	1	1	1	ID	0.993	1	1	1
22750	0.965	0.965	0.993	0.993	0.993	0.993	0.993	0.993	0.993	0.993	0.993	0.989	0.993	0.989	0.989	0.993	0.989	0.993	0.993	0.993	0.993	0.993	0.993	0.993	0.993	0.993	0.993	0.993	0.993	0.993	0.993	0.993	0.989	0.989	0.993	0.993	0.993	0.993	0.993	0.989	0.989	0.993	0.993	0.993	0.993	ID	0.993	0.993	0.993
22608-1	0.972	0.972	1	1	1	1	1	1	1	0.993	1	0.996	1	0.996	0.996	1	0.996	1	1	1	1	1	1	1	1	1	1	1	1	1	1	1	0.996	0.996	1	1	1	1	1	0.996	0.996	1	1	1	1	0.993	ID	1	1
22608-2T	0.972	0.972	1	1	1	1	1	1	1	0.993	1	0.996	1	0.996	0.996	1	0.996	1	1	1	1	1	1	1	1	1	1	1	1	1	1	1	0.996	0.996	1	1	1	1	1	0.996	0.996	1	1	1	1	0.993	1	ID	1
22608-3T	0.972	0.972	1	1	1	1	1	1	1	0.993	1	0.996	1	0.996	0.996	1	0.996	1	1	1	1	1	1	1	1	1	1	1	1	1	1	1	0.996	0.996	1	1	1	1	1	0.996	0.996	1	1	1	1	0.993	1	1	ID
22608-2	0.972	0.972	1	1	1	1	1	1	1	0.993	1	0.996	1	0.996	0.996	1	0.996	1	1	1	1	1	1	1	1	1	1	1	1	1	1	1	0.996	0.996	1	1	1	1	1	0.996	0.996	1	1	1	1	0.993	1	1	1
22608-1T	0.972	0.972	1	1	1	1	1	1	1	0.993	1	0.996	1	0.996	0.996	1	0.996	1	1	1	1	1	1	1	1	1	1	1	1	1	1	1	0.996	0.996	1	1	1	1	1	0.996	0.996	1	1	1	1	0.993	1	1	1
23589-3	0.969	0.969	0.996	0.996	0.996	0.996	0.996	0.996	0.996	0.989	0.996	0.993	0.996	0.993	0.993	0.996	0.993	0.996	0.996	0.996	0.996	0.996	0.996	0.996	0.996	0.996	0.996	0.996	0.996	0.996	0.996	0.996	0.993	0.993	0.996	0.996	0.996	0.996	0.996	0.993	0.993	0.996	0.996	0.996	0.996	0.989	0.996	0.996	0.996
23589-4	0.972	0.972	1	1	1	1	1	1	1	0.993	1	0.996	1	0.996	0.996	1	0.996	1	1	1	1	1	1	1	1	1	1	1	1	1	1	1	0.996	0.996	1	1	1	1	1	0.996	0.996	1	1	1	1	0.993	1	1	1
23589-1T	0.972	0.972	1	1	1	1	1	1	1	0.993	1	0.996	1	0.996	0.996	1	0.996	1	1	1	1	1	1	1	1	1	1	1	1	1	1	1	0.996	0.996	1	1	1	1	1	0.996	0.996	1	1	1	1	0.993	1	1	1
23589-1T	0.972	0.972	1	1	1	1	1	1	1	0.993	1	0.996	1	0.996	0.996	1	0.996	1	1	1	1	1	1	1	1	1	1	1	1	1	1	1	0.996	0.996	1	1	1	1	1	0.996	0.996	1	1	1	1	0.993	1	1	1
22224-3K	0.972	0.972	1	1	1	1	1	1	1	0.993	1	0.996	1	0.996	0.996	1	0.996	1	1	1	1	1	1	1	1	1	1	1	1	1	1	1	0.996	0.996	1	1	1	1	1	0.996	0.996	1	1	1	1	0.993	1	1	1
22224-3T	0.972	0.972	1	1	1	1	1	1	1	0.993	1	0.996	1	0.996	0.996	1	0.996	1	1	1	1	1	1	1	1	1	1	1	1	1	1	1	0.996	0.996	1	1	1	1	1	0.996	0.996	1	1	1	1	0.993	1	1	1
22224-2T	0.972	0.972	1	1	1	1	1	1	1	0.993	1	0.996	1	0.996	0.996	1	0.996	1	1	1	1	1	1	1	1	1	1	1	1	1	1	1	0.996	0.996	1	1	1	1	1	0.996	0.996	1	1	1	1	0.993	1	1	1
22224-4T	0.972	0.972	1	1	1	1	1	1	1	0.993	1	0.996	1	0.996	0.996	1	0.996	1	1	1	1	1	1	1	1	1	1	1	1	1	1	1	0.996	0.996	1	1	1	1	1	0.996	0.996	1	1	1	1	0.993	1	1	1
Sequence Difference Count Matrix
M2-nt	20689-27T	20689-28T	18520-2	18520-1	22380	25690	23608	23608-1K	23609	23458-1K	25338-1	25338-2	2968	8028-1	8028-2	3306-1	3306-2	63	21312	25702-2	25827-2	25827-1	25827-3	2755	22684	22477-1	22477-2	23404-2T	23404	23404-4K	23404-4T	23404-2K	61-1	61-2	785	785	913	913	913	25322-205	25322-229	25322-179	23458-5T	23458-4T	23458-2T	22750	22608-1	22608-2T	22608-3T
20689-27T	ID	0	8	8	8	8	8	8	8	10	8	9	8	9	9	8	9	8	8	8	8	8	8	8	8	8	8	8	8	8	8	8	7	7	8	8	8	8	8	9	9	8	8	8	8	10	8	8	8
20689-28T	0	ID	8	8	8	8	8	8	8	10	8	9	8	9	9	8	9	8	8	8	8	8	8	8	8	8	8	8	8	8	8	8	7	7	8	8	8	8	8	9	9	8	8	8	8	10	8	8	8
18520-2	8	8	ID	0	0	0	0	0	0	2	0	1	0	1	1	0	1	0	0	0	0	0	0	0	0	0	0	0	0	0	0	0	1	1	0	0	0	0	0	1	1	0	0	0	0	2	0	0	0
18520-1	8	8	0	ID	0	0	0	0	0	2	0	1	0	1	1	0	1	0	0	0	0	0	0	0	0	0	0	0	0	0	0	0	1	1	0	0	0	0	0	1	1	0	0	0	0	2	0	0	0
22380	8	8	0	0	ID	0	0	0	0	2	0	1	0	1	1	0	1	0	0	0	0	0	0	0	0	0	0	0	0	0	0	0	1	1	0	0	0	0	0	1	1	0	0	0	0	2	0	0	0
25690	8	8	0	0	0	ID	0	0	0	2	0	1	0	1	1	0	1	0	0	0	0	0	0	0	0	0	0	0	0	0	0	0	1	1	0	0	0	0	0	1	1	0	0	0	0	2	0	0	0
23608	8	8	0	0	0	0	ID	0	0	2	0	1	0	1	1	0	1	0	0	0	0	0	0	0	0	0	0	0	0	0	0	0	1	1	0	0	0	0	0	1	1	0	0	0	0	2	0	0	0
23608-1K	8	8	0	0	0	0	0	ID	0	2	0	1	0	1	1	0	1	0	0	0	0	0	0	0	0	0	0	0	0	0	0	0	1	1	0	0	0	0	0	1	1	0	0	0	0	2	0	0	0
23609	8	8	0	0	0	0	0	0	ID	2	0	1	0	1	1	0	1	0	0	0	0	0	0	0	0	0	0	0	0	0	0	0	1	1	0	0	0	0	0	1	1	0	0	0	0	2	0	0	0
23458-1K	10	10	2	2	2	2	2	2	2	ID	2	3	2	3	3	2	3	2	2	2	2	2	2	2	2	2	2	2	2	2	2	2	3	3	2	2	2	2	2	3	3	2	2	2	2	2	2	2	2
25338-1	8	8	0	0	0	0	0	0	0	2	ID	1	0	1	1	0	1	0	0	0	0	0	0	0	0	0	0	0	0	0	0	0	1	1	0	0	0	0	0	1	1	0	0	0	0	2	0	0	0
25338-2	9	9	1	1	1	1	1	1	1	3	1	ID	1	2	2	1	2	1	1	1	1	1	1	1	1	1	1	1	1	1	1	1	2	2	1	1	1	1	1	2	2	1	1	1	1	3	1	1	1
2968	8	8	0	0	0	0	0	0	0	2	0	1	ID	1	1	0	1	0	0	0	0	0	0	0	0	0	0	0	0	0	0	0	1	1	0	0	0	0	0	1	1	0	0	0	0	2	0	0	0
8028-1	9	9	1	1	1	1	1	1	1	3	1	2	1	ID	0	1	2	1	1	1	1	1	1	1	1	1	1	1	1	1	1	1	2	2	1	1	1	1	1	2	2	1	1	1	1	3	1	1	1
8028-2	9	9	1	1	1	1	1	1	1	3	1	2	1	0	ID	1	2	1	1	1	1	1	1	1	1	1	1	1	1	1	1	1	2	2	1	1	1	1	1	2	2	1	1	1	1	3	1	1	1
3306-1	8	8	0	0	0	0	0	0	0	2	0	1	0	1	1	ID	1	0	0	0	0	0	0	0	0	0	0	0	0	0	0	0	1	1	0	0	0	0	0	1	1	0	0	0	0	2	0	0	0
3306-2	9	9	1	1	1	1	1	1	1	3	1	2	1	2	2	1	ID	1	1	1	1	1	1	1	1	1	1	1	1	1	1	1	2	2	1	1	1	1	1	2	2	1	1	1	1	3	1	1	1
63	8	8	0	0	0	0	0	0	0	2	0	1	0	1	1	0	1	ID	0	0	0	0	0	0	0	0	0	0	0	0	0	0	1	1	0	0	0	0	0	1	1	0	0	0	0	2	0	0	0
21312	8	8	0	0	0	0	0	0	0	2	0	1	0	1	1	0	1	0	ID	0	0	0	0	0	0	0	0	0	0	0	0	0	1	1	0	0	0	0	0	1	1	0	0	0	0	2	0	0	0
25702-2	8	8	0	0	0	0	0	0	0	2	0	1	0	1	1	0	1	0	0	ID	0	0	0	0	0	0	0	0	0	0	0	0	1	1	0	0	0	0	0	1	1	0	0	0	0	2	0	0	0
25827-2	8	8	0	0	0	0	0	0	0	2	0	1	0	1	1	0	1	0	0	0	ID	0	0	0	0	0	0	0	0	0	0	0	1	1	0	0	0	0	0	1	1	0	0	0	0	2	0	0	0
25827-1	8	8	0	0	0	0	0	0	0	2	0	1	0	1	1	0	1	0	0	0	0	ID	0	0	0	0	0	0	0	0	0	0	1	1	0	0	0	0	0	1	1	0	0	0	0	2	0	0	0
25827-3	8	8	0	0	0	0	0	0	0	2	0	1	0	1	1	0	1	0	0	0	0	0	ID	0	0	0	0	0	0	0	0	0	1	1	0	0	0	0	0	1	1	0	0	0	0	2	0	0	0
2755	8	8	0	0	0	0	0	0	0	2	0	1	0	1	1	0	1	0	0	0	0	0	0	ID	0	0	0	0	0	0	0	0	1	1	0	0	0	0	0	1	1	0	0	0	0	2	0	0	0
22684	8	8	0	0	0	0	0	0	0	2	0	1	0	1	1	0	1	0	0	0	0	0	0	0	ID	0	0	0	0	0	0	0	1	1	0	0	0	0	0	1	1	0	0	0	0	2	0	0	0
22477-1	8	8	0	0	0	0	0	0	0	2	0	1	0	1	1	0	1	0	0	0	0	0	0	0	0	ID	0	0	0	0	0	0	1	1	0	0	0	0	0	1	1	0	0	0	0	2	0	0	0
22477-2	8	8	0	0	0	0	0	0	0	2	0	1	0	1	1	0	1	0	0	0	0	0	0	0	0	0	ID	0	0	0	0	0	1	1	0	0	0	0	0	1	1	0	0	0	0	2	0	0	0
23404-2T	8	8	0	0	0	0	0	0	0	2	0	1	0	1	1	0	1	0	0	0	0	0	0	0	0	0	0	ID	0	0	0	0	1	1	0	0	0	0	0	1	1	0	0	0	0	2	0	0	0
23404	8	8	0	0	0	0	0	0	0	2	0	1	0	1	1	0	1	0	0	0	0	0	0	0	0	0	0	0	ID	0	0	0	1	1	0	0	0	0	0	1	1	0	0	0	0	2	0	0	0
23404-4K	8	8	0	0	0	0	0	0	0	2	0	1	0	1	1	0	1	0	0	0	0	0	0	0	0	0	0	0	0	ID	0	0	1	1	0	0	0	0	0	1	1	0	0	0	0	2	0	0	0
23404-4T	8	8	0	0	0	0	0	0	0	2	0	1	0	1	1	0	1	0	0	0	0	0	0	0	0	0	0	0	0	0	ID	0	1	1	0	0	0	0	0	1	1	0	0	0	0	2	0	0	0
23404-2K	8	8	0	0	0	0	0	0	0	2	0	1	0	1	1	0	1	0	0	0	0	0	0	0	0	0	0	0	0	0	0	ID	1	1	0	0	0	0	0	1	1	0	0	0	0	2	0	0	0
61-1	7	7	1	1	1	1	1	1	1	3	1	2	1	2	2	1	2	1	1	1	1	1	1	1	1	1	1	1	1	1	1	1	ID	0	1	1	1	1	1	2	2	1	1	1	1	3	1	1	1
61-2	7	7	1	1	1	1	1	1	1	3	1	2	1	2	2	1	2	1	1	1	1	1	1	1	1	1	1	1	1	1	1	1	0	ID	1	1	1	1	1	2	2	1	1	1	1	3	1	1	1
785	8	8	0	0	0	0	0	0	0	2	0	1	0	1	1	0	1	0	0	0	0	0	0	0	0	0	0	0	0	0	0	0	1	1	ID	0	0	0	0	1	1	0	0	0	0	2	0	0	0
785	8	8	0	0	0	0	0	0	0	2	0	1	0	1	1	0	1	0	0	0	0	0	0	0	0	0	0	0	0	0	0	0	1	1	0	ID	0	0	0	1	1	0	0	0	0	2	0	0	0
913	8	8	0	0	0	0	0	0	0	2	0	1	0	1	1	0	1	0	0	0	0	0	0	0	0	0	0	0	0	0	0	0	1	1	0	0	ID	0	0	1	1	0	0	0	0	2	0	0	0
913	8	8	0	0	0	0	0	0	0	2	0	1	0	1	1	0	1	0	0	0	0	0	0	0	0	0	0	0	0	0	0	0	1	1	0	0	0	ID	0	1	1	0	0	0	0	2	0	0	0
913	8	8	0	0	0	0	0	0	0	2	0	1	0	1	1	0	1	0	0	0	0	0	0	0	0	0	0	0	0	0	0	0	1	1	0	0	0	0	ID	1	1	0	0	0	0	2	0	0	0
25322-205	9	9	1	1	1	1	1	1	1	3	1	2	1	2	2	1	2	1	1	1	1	1	1	1	1	1	1	1	1	1	1	1	2	2	1	1	1	1	1	ID	0	1	1	1	1	3	1	1	1
25322-229	9	9	1	1	1	1	1	1	1	3	1	2	1	2	2	1	2	1	1	1	1	1	1	1	1	1	1	1	1	1	1	1	2	2	1	1	1	1	1	0	ID	1	1	1	1	3	1	1	1
25322-179	8	8	0	0	0	0	0	0	0	2	0	1	0	1	1	0	1	0	0	0	0	0	0	0	0	0	0	0	0	0	0	0	1	1	0	0	0	0	0	1	1	ID	0	0	0	2	0	0	0
23458-5T	8	8	0	0	0	0	0	0	0	2	0	1	0	1	1	0	1	0	0	0	0	0	0	0	0	0	0	0	0	0	0	0	1	1	0	0	0	0	0	1	1	0	ID	0	0	2	0	0	0
23458-4T	8	8	0	0	0	0	0	0	0	2	0	1	0	1	1	0	1	0	0	0	0	0	0	0	0	0	0	0	0	0	0	0	1	1	0	0	0	0	0	1	1	0	0	ID	0	2	0	0	0
23458-2T	8	8	0	0	0	0	0	0	0	2	0	1	0	1	1	0	1	0	0	0	0	0	0	0	0	0	0	0	0	0	0	0	1	1	0	0	0	0	0	1	1	0	0	0	ID	2	0	0	0
22750	10	10	2	2	2	2	2	2	2	2	2	3	2	3	3	2	3	2	2	2	2	2	2	2	2	2	2	2	2	2	2	2	3	3	2	2	2	2	2	3	3	2	2	2	2	ID	2	2	2
22608-1	8	8	0	0	0	0	0	0	0	2	0	1	0	1	1	0	1	0	0	0	0	0	0	0	0	0	0	0	0	0	0	0	1	1	0	0	0	0	0	1	1	0	0	0	0	2	ID	0	0
22608-2T	8	8	0	0	0	0	0	0	0	2	0	1	0	1	1	0	1	0	0	0	0	0	0	0	0	0	0	0	0	0	0	0	1	1	0	0	0	0	0	1	1	0	0	0	0	2	0	ID	0
22608-3T	8	8	0	0	0	0	0	0	0	2	0	1	0	1	1	0	1	0	0	0	0	0	0	0	0	0	0	0	0	0	0	0	1	1	0	0	0	0	0	1	1	0	0	0	0	2	0	0	ID
22608-2	8	8	0	0	0	0	0	0	0	2	0	1	0	1	1	0	1	0	0	0	0	0	0	0	0	0	0	0	0	0	0	0	1	1	0	0	0	0	0	1	1	0	0	0	0	2	0	0	0
22608-1T	8	8	0	0	0	0	0	0	0	2	0	1	0	1	1	0	1	0	0	0	0	0	0	0	0	0	0	0	0	0	0	0	1	1	0	0	0	0	0	1	1	0	0	0	0	2	0	0	0
23589-3	9	9	1	1	1	1	1	1	1	3	1	2	1	2	2	1	2	1	1	1	1	1	1	1	1	1	1	1	1	1	1	1	2	2	1	1	1	1	1	2	2	1	1	1	1	3	1	1	1
23589-4	8	8	0	0	0	0	0	0	0	2	0	1	0	1	1	0	1	0	0	0	0	0	0	0	0	0	0	0	0	0	0	0	1	1	0	0	0	0	0	1	1	0	0	0	0	2	0	0	0
23589-1T	8	8	0	0	0	0	0	0	0	2	0	1	0	1	1	0	1	0	0	0	0	0	0	0	0	0	0	0	0	0	0	0	1	1	0	0	0	0	0	1	1	0	0	0	0	2	0	0	0
23589-1T	8	8	0	0	0	0	0	0	0	2	0	1	0	1	1	0	1	0	0	0	0	0	0	0	0	0	0	0	0	0	0	0	1	1	0	0	0	0	0	1	1	0	0	0	0	2	0	0	0
22224-3K	8	8	0	0	0	0	0	0	0	2	0	1	0	1	1	0	1	0	0	0	0	0	0	0	0	0	0	0	0	0	0	0	1	1	0	0	0	0	0	1	1	0	0	0	0	2	0	0	0
22224-3T	8	8	0	0	0	0	0	0	0	2	0	1	0	1	1	0	1	0	0	0	0	0	0	0	0	0	0	0	0	0	0	0	1	1	0	0	0	0	0	1	1	0	0	0	0	2	0	0	0
22224-2T	8	8	0	0	0	0	0	0	0	2	0	1	0	1	1	0	1	0	0	0	0	0	0	0	0	0	0	0	0	0	0	0	1	1	0	0	0	0	0	1	1	0	0	0	0	2	0	0	0
22224-4T	8	8	0	0	0	0	0	0	0	2	0	1	0	1	1	0	1	0	0	0	0	0	0	0	0	0	0	0	0	0	0	0	1	1	0	0	0	0	0	1	1	0	0	0	0	2	0	0	0
[truncated: 70 more columns]

[truncated: 3 more sheets: NS, NS1, NS2]
